# Supplementary material for: Interactions between Germline and Somatic Mutated Genes in Aggressive Prostate Cancer
Source: Prostate Cancer. 2019 Mar 17;2019:4047680. doi: 10.1155/2019/4047680 (PMC6441536; doi:10.1155/2019/4047680)
Supplement: Supplementary Materials — Table S1B: list of significantly differentially expressed nonsomatic mutated genes associated with aggressive PCa along with estimates of P values, adjusted P values, and log fold change. Table SA: a comprehensive list of single nucleotide polymorphisms (herein called genetic variants). Table S1A: list of significantly differentially expressed somatic mutated genes associated with aggressive PCa. [file 4047680.f1.zip]

Archive with 3 entries (3 files):
- TARUN-HICKS-POJECT2-PCA-Table S1A-SUBMITTED.xlsx
- TARUN-HICKS_PROJECT2-PCA-Table SA-SUBMITTED.xlsx
- TARUN_HICKS-PROJECT2-PCA-Table S1B-SUBMITTED.xlsx
