# Supplementary material for: Interactions between Germline and Somatic Mutated Genes in Aggressive Prostate Cancer
Source: Prostate Cancer. 2019 Mar 17;2019:4047680. doi: 10.1155/2019/4047680 (PMC6441536; doi:10.1155/2019/4047680)
Supplement: Supplementary Materials — Table S1B: list of significantly differentially expressed nonsomatic mutated genes associated with aggressive PCa along with estimates of P values, adjusted P values, and log fold change. Table SA: a comprehensive list of single nucleotide polymorphisms (herein called genetic variants). Table S1A: list of significantly differentially expressed somatic mutated genes associated with aggressive PCa. [file 4047680.f1.zip › TARUN-HICKS-POJECT2-PCA-Table S1A-SUBMITTED.xlsx]

## Sheet: somatic_sign
Table S1A List of significantly differentially expressed somatic mutated genes associated with aggressive PCa along with estimates of p-values, adjusted p-values, log fold change and the frequency of somatic mutation evens in each gene.
Genes	logFC	P.Value	adj.P.Val	frequency of mutations
SPOP	-0.519324	6.36e-27	2.13e-25	29
ATM	-0.277867	0.00260406	0.00452585	13
FOXA1	1.74662	1.81e-33	1.41e-31	12
KMT2C	-0.198833	0.033409	0.0479897	12
LRP1B	-2.52425	7.28e-33	5.18e-31	10
FAT3	-2.58808	6.7e-42	1.69e-39	9
OBSCN	-0.661254	3.37e-05	7.66e-05	9
FREM2	-1.50272	7.45e-13	4.6e-12	8
CSMD3	-0.820642	0.000149778	0.0003123	8
KIF16B	-0.256379	0.013321	0.0205666	8
PCDH18	-1.20824	2.13e-16	2e-15	7
SYNE1	-0.787736	3.26e-08	1.12e-07	7
AHNAK	-0.52156	2.36e-06	6.32e-06	7
PLCB4	0.445203	4.56e-05	0.00010186	7
FAT2	-2.41448	2.86e-33	2.13e-31	6
FAM83B	-3.02961	1.25e-32	8.65e-31	6
DCHS2	-2.30407	9.86e-29	4.08e-27	6
CDH23	-1.50918	2.55e-28	1.01e-26	6
MACF1	-0.396468	3.79e-06	9.9e-06	6
FLG	-1.06896	1.22e-05	2.97e-05	6
PIK3CA	-0.366222	1.4e-05	3.39e-05	6
VPS13D	-0.2929	1.86e-05	4.42e-05	6
HFM1	-0.654114	0.00189159	0.0033621	6
PTPRD	-0.482808	0.01112	0.0173808	6
EPHB1	-2.53883	2.83e-43	9.49e-41	5
KIAA1614	-1.28035	1.76e-27	6.36e-26	5
AHNAK2	-1.92268	2.26e-27	8.04e-26	5
MXRA5	-0.82427	7.59e-08	2.48e-07	5
SACS	-0.620706	2.3e-07	7.04e-07	5
ASH1L	-0.414745	2.99e-05	6.85e-05	5
RYR2	-0.914344	3.96e-05	8.91e-05	5
CTNNB1	-0.21715	0.000166461	0.000344978	5
MT-ND5	-0.434648	0.0090889	0.0144338	5
FZD4	0.25049	0.0290636	0.0421852	5
LRP4	-1.34717	2.2e-27	7.84e-26	4
FILIP1	-1.738	2.31e-26	7.09e-25	4
DOCK3	-1.3653	7.81e-24	1.75e-22	4
TNS1	-1.79701	3.86e-21	6.35e-20	4
TBC1D2	-0.841627	4e-21	6.57e-20	4
SPEG	-1.50631	1.21e-20	1.87e-19	4
FAT4	-1.47746	5.43e-19	7.01e-18	4
APOB	-1.97377	4.8e-18	5.48e-17	4
GRIN2A	-1.87995	9.32e-18	1.03e-16	4
ZFPM2	-1.543	1.63e-17	1.75e-16	4
KLHL2	-0.596616	2.58e-17	2.72e-16	4
DST	-1.14102	9.6e-15	7.48e-14	4
RAG1	-1.11385	3.3e-13	2.13e-12	4
PCDHGA9	-1.30883	3.46e-13	2.23e-12	4
CACNA1C	-0.892725	1.41e-12	8.42e-12	4
IFI16	-0.837102	2.89e-11	1.46e-10	4
DNAH8	2.48176	3.53e-10	1.54e-09	4
ARHGAP32	0.643427	4.06e-10	1.77e-09	4
PTEN	-0.695971	5.42e-10	2.32e-09	4
TRIM28	0.343862	2.71e-09	1.07e-08	4
MYCBP2	-0.655632	3.41e-09	1.32e-08	4
NPAT	-0.434908	6.4e-08	2.12e-07	4
SMAD4	-0.299159	3.63e-07	1.08e-06	4
SALL1	-1.14224	8.31e-07	2.36e-06	4
EPHA3	-0.875777	1.3e-06	3.61e-06	4
ZFHX3	-0.44901	1.59e-06	4.35e-06	4
ZNF521	-0.565949	2.85e-05	6.53e-05	4
TLK1	0.299491	4.81e-05	0.000107186	4
PCDHA1	1.60271	0.000146918	0.00030651	4
DEPDC1	0.815218	0.00031204	0.000621786	4
COL11A1	1.17532	0.000325456	0.00064712	4
VPS13C	-0.35147	0.000340018	0.000674449	4
XPO4	-0.2666	0.000379296	0.000747717	4
KIAA1109	-0.332254	0.00118083	0.00216392	4
TACC2	-0.217351	0.00126777	0.00231106	4
EPB41L5	0.240987	0.00165412	0.0029649	4
CSMD1	-0.8379	0.00324625	0.00556018	4
CHD1	-0.280602	0.00705517	0.0114146	4
PCLO	-0.287565	0.00953808	0.0150848	4
ZFHX4	-0.443887	0.0124431	0.0193047	4
PKHD1	-0.673294	0.0133701	0.0206387	4
PDZD2	-0.306153	0.0166972	0.0253854	4
MTOR	0.196213	0.0259322	0.0380023	4
NYNRIN	-2.15067	2.29e-45	1.1e-42	3
PAQR8	-1.69903	9.87e-39	1.75e-36	3
TGFBR3	-1.66637	2.07e-33	1.6e-31	3
WIF1	-3.12947	1.46e-31	8.9e-30	3
ITSN1	-0.850587	7.17e-29	3.04e-27	3
COL17A1	-2.78333	2.04e-26	6.33e-25	3
ATP2B4	-1.7988	2.9e-25	7.72e-24	3
MKI67	2.17718	6.04e-24	1.38e-22	3
EPB41L3	-1.31257	6.35e-24	1.45e-22	3
NOS1	-2.30023	3.9e-23	8.18e-22	3
CDC20	1.9414	4.14e-23	8.65e-22	3
ZNF536	-1.98873	6.37e-22	1.15e-20	3
IL6ST	-0.958325	4.67e-21	7.63e-20	3
HCFC2	-0.595381	2.61e-20	3.93e-19	3
DOT1L	0.662732	9.52e-18	1.05e-16	3
SCN7A	-1.54976	3.66e-17	3.78e-16	3
LRGUK	1.37316	5.99e-16	5.35e-15	3
FAM196A	-1.35093	1.15e-14	8.85e-14	3
PKHD1L1	-1.3919	1.97e-13	1.32e-12	3
SKIV2L2	-0.471089	4.98e-13	3.14e-12	3
RUNX1T1	-0.930434	5.5e-13	3.45e-12	3
ERBB4	-1.3236	4.7e-12	2.63e-11	3
TIGD3	0.907161	1.63e-11	8.52e-11	3
RNF215	0.515235	4.07e-11	2.02e-10	3
NAV3	-0.976818	6.44e-11	3.1e-10	3
ST3GAL1	-0.81192	7.15e-11	3.42e-10	3
MYO9A	-0.48083	1.2e-10	5.57e-10	3
SRSF2	0.293553	3.58e-10	1.56e-09	3
CUL2	-0.267996	1.37e-09	5.55e-09	3
DIP2A	0.548031	1.6e-09	6.43e-09	3
EGFR	-0.61827	2.04e-09	8.09e-09	3
DNAJC13	-0.420054	2.85e-09	1.12e-08	3
TMEM5	0.34132	3.34e-09	1.3e-08	3
HIST1H2BG	1.47258	7.73e-09	2.88e-08	3
MME	-1.58516	1.37e-08	4.93e-08	3
F8	-0.513437	1.7e-08	6.04e-08	3
SIPA1L3	0.475233	1.85e-08	6.53e-08	3
ACTG1	0.362391	4.59e-08	1.55e-07	3
ARHGEF39	0.626584	6.79e-08	2.24e-07	3
WDR7	-0.425206	7.04e-08	2.31e-07	3
IL4R	-0.462233	8.98e-08	2.91e-07	3
MIA3	0.54561	2.39e-07	7.29e-07	3
DHTKD1	0.447659	2.43e-07	7.41e-07	3
BAZ2B	-0.383816	2.44e-07	7.43e-07	3
ADAMTS13	0.630891	2.55e-07	7.77e-07	3
CMIP	-0.409495	2.8e-07	8.46e-07	3
OTUD4	-0.396387	6.78e-07	1.95e-06	3
HDAC3	0.208851	9.2e-07	2.59e-06	3
ATF7IP	-0.40005	1.13e-06	3.15e-06	3
PHLDB1	-0.505656	2.82e-06	7.5e-06	3
SEL1L3	0.545783	4.16e-06	1.08e-05	3
SSRP1	0.188103	6.09e-06	1.55e-05	3
ARID1B	-0.300403	6.76e-06	1.71e-05	3
ZNF827	-0.491842	9.16e-06	2.27e-05	3
ZNF230	-0.194964	9.68e-06	2.39e-05	3
PPFIA3	0.550289	9.72e-06	2.4e-05	3
TRPM6	-0.749877	1.01e-05	2.49e-05	3
USP37	-0.656657	1.27e-05	3.08e-05	3
PTCHD4	-0.863563	1.56e-05	3.76e-05	3
KMT2A	-0.339308	1.74e-05	4.15e-05	3
TRIP12	-0.269417	2e-05	4.72e-05	3
EFCAB7	-0.236888	2.14e-05	5.01e-05	3
BOD1L1	-0.410841	2.35e-05	5.48e-05	3
RBL2	-0.465429	2.52e-05	5.83e-05	3
ROCK1	-0.388031	3.18e-05	7.25e-05	3
HIPK1	-0.318459	3.54e-05	8.02e-05	3
PKD1	-0.352476	4.35e-05	9.74e-05	3
BRAF	0.276761	4.66e-05	0.00010402	3
PDPR	-0.353281	4.72e-05	0.000105373	3
UBR3	-0.330304	4.73e-05	0.000105592	3
NCOR1	-0.30981	4.82e-05	0.000107298	3
MYL6	-0.397213	4.94e-05	0.000109771	3
FREM1	-0.627834	7.3e-05	0.000158686	3
USP31	-0.30524	8.5e-05	0.000182683	3
MALAT1	0.57056	8.54e-05	0.00018339	3
DNAH2	0.589437	9.32e-05	0.000199233	3
BCL6	-0.412969	9.61e-05	0.000205156	3
APC	-0.379207	0.000116072	0.000245182	3
RPRD2	-0.265078	0.000139126	0.00029088	3
HRAS	0.400134	0.000172564	0.000356943	3
CGNL1	-0.357198	0.000184987	0.00038093	3
PTH2R	-0.891289	0.000204234	0.000418134	3
ABHD8	-0.301593	0.000248976	0.000503085	3
EML5	-0.85081	0.000310418	0.000618955	3
ATP11B	0.383089	0.000331071	0.000657787	3
GAB2	-0.347327	0.000384674	0.00075751	3
KIF13A	-0.258467	0.000396595	0.000778456	3
ZAP70	0.655175	0.00049236	0.00095347	3
MAST1	0.592286	0.000494328	0.000956777	3
DGUOK	0.247817	0.000634687	0.00121303	3
BCORL1	-0.259329	0.000680216	0.00129414	3
LRIG3	-0.328018	0.000681188	0.00129585	3
CNOT1	-0.329426	0.00091662	0.00171105	3
KIAA1324L	-0.563235	0.00105314	0.0019452	3
LILRB5	0.614274	0.00113822	0.00209291	3
CHD4	-0.137844	0.00167192	0.00299389	3
C1S	-0.487624	0.00281045	0.00486072	3
ACAN	0.751984	0.00320805	0.00550037	3
GMIP	0.204482	0.00384323	0.00650647	3
ANKRD28	0.166817	0.00397805	0.0067113	3
TMC1	-0.65013	0.00414204	0.00696819	3
SLC12A6	-0.254937	0.00445013	0.00745104	3
SYNE2	-0.287409	0.004952	0.00822862	3
AQR	-0.183516	0.00564672	0.00928506	3
TRIOBP	-0.17506	0.00653839	0.0106496	3
UTRN	0.283191	0.0122442	0.0190137	3
DIRC2	0.183534	0.013275	0.0205039	3
NCOA1	-0.200171	0.0137628	0.021211	3
PTCH2	0.25899	0.0153291	0.0234428	3
CNOT6L	-0.145574	0.0166395	0.025308	3
GPR158	0.701933	0.0265256	0.0387948	3
HDAC6	0.101507	0.0289392	0.0420212	3
PTPRC	-0.377896	0.0340219	0.0488169	3
AOX1	-2.86162	4.22e-51	4.32e-48	2
SEMA6D	-2.07315	1.99e-44	7.99e-42	2
MPP2	-1.93842	1.01e-42	2.96e-40	2
CLCA2	-3.88158	5.58e-40	1.13e-37	2
SCN5A	-2.07994	3.16e-39	5.88e-37	2
ADRA1A	-2.73537	2.08e-38	3.46e-36	2
PTGS1	-2.18712	3.43e-37	4.76e-35	2
GUCY2C	-2.02685	1.59e-35	1.75e-33	2
TRIM9	-2.03048	1.72e-34	1.59e-32	2
KLHL4	-2.25762	1.15e-33	9.25e-32	2
ZNF516	-1.66786	4.08e-33	2.98e-31	2
CCDC178	-2.1516	1.64e-32	1.12e-30	2
SMOC1	-2.54721	1.81e-32	1.22e-30	2
DUOX2	-2.78095	2.94e-32	1.93e-30	2
MAP1A	-1.70921	1.98e-31	1.17e-29	2
TRGC1	2.61854	2.08e-31	1.22e-29	2
CTTNBP2	-1.59293	2.55e-31	1.47e-29	2
ADRA1D	-2.59346	4.95e-30	2.4e-28	2
ANO4	-1.98117	1.69e-29	7.72e-28	2
NAV2	-1.6091	2.64e-29	1.18e-27	2
PEG3	-1.27073	9.39e-29	3.91e-27	2
CLCNKB	-1.8765	4.11e-28	1.59e-26	2
GLI3	-1.2719	1.44e-27	5.29e-26	2
TSHZ3	-1.19244	8.19e-27	2.69e-25	2
ACACB	-1.16981	2.4e-26	7.34e-25	2
GSTM2	-1.66797	2.52e-26	7.68e-25	2
KANK1	-1.06892	8.35e-26	2.35e-24	2
MYLK	-2.43836	1.32e-25	3.63e-24	2
CPAMD8	-1.74331	2.93e-25	7.8e-24	2
NNT	-1.02393	3.83e-25	1e-23	2
TRPC4	-1.54936	4.29e-25	1.12e-23	2
NRXN3	-1.5024	5.57e-25	1.44e-23	2
ZNF750	-2.16003	9.75e-25	2.45e-23	2
DMD	-1.72405	1.19e-24	2.94e-23	2
JPH2	-1.86067	2.05e-23	4.43e-22	2
TARBP1	1.04379	3.78e-23	7.95e-22	2
ADGRG6	-1.64111	5.88e-23	1.21e-21	2
KIFC1	1.6136	7.89e-23	1.6e-21	2
MAPRE1	-0.451019	1.47e-22	2.88e-21	2
VAV3	-1.29163	1.63e-22	3.18e-21	2
GPR87	-2.59449	2.13e-22	4.12e-21	2
ELF4	-1.14834	1.76e-21	2.98e-20	2
CELSR2	-0.985554	2.14e-21	3.59e-20	2
WSCD2	-1.77099	7.14e-21	1.13e-19	2
ARHGEF19	-1.18548	1.6e-20	2.45e-19	2
TLN1	-0.844363	1.77e-20	2.69e-19	2
HELQ	-0.371676	1.84e-20	2.8e-19	2
TGFB1I1	-1.49462	2.73e-20	4.1e-19	2
DGKD	0.803825	2.78e-20	4.17e-19	2
AGPS	-0.938551	3.4e-20	5.04e-19	2
COL21A1	-1.31207	4.88e-20	7.12e-19	2
PLD1	-1.06022	1.25e-19	1.76e-18	2
SV2A	-1.1316	1.85e-19	2.55e-18	2
PLXNA2	-0.883874	2.67e-19	3.58e-18	2
ROBO1	-1.28854	4.52e-19	5.89e-18	2
AHDC1	-0.678952	1.75e-18	2.1e-17	2
ASTN1	-2.14342	2.16e-18	2.58e-17	2
BYSL	0.624196	2.19e-18	2.61e-17	2
BICD1	1.5382	2.21e-18	2.63e-17	2
C16orf89	-1.62132	5.31e-18	6.03e-17	2
INPP5D	-1.10396	6.7e-18	7.52e-17	2
ACE	-1.07074	7.01e-18	7.85e-17	2
P4HA2	-0.743605	1.25e-17	1.37e-16	2
STK36	0.630811	1.3e-17	1.42e-16	2
BCL11A	-1.58878	2.02e-17	2.15e-16	2
CACNB4	-1.21529	2.12e-17	2.25e-16	2
MAP7D3	-0.87575	2.83e-17	2.96e-16	2
ABCC9	-1.26056	2.96e-17	3.1e-16	2
VARS2	0.598768	3.14e-17	3.28e-16	2
CHD9	-0.777462	3.52e-17	3.64e-16	2
HECW1	-1.91299	4.78e-17	4.84e-16	2
ASPM	1.76294	5.12e-17	5.16e-16	2
EZH1	-0.457747	5.18e-17	5.23e-16	2
MET	-1.25333	7.47e-17	7.38e-16	2
B4GALNT4	1.8816	1.32e-16	1.27e-15	2
TSPAN7	-1.02335	1.47e-16	1.41e-15	2
FMN2	-1.46932	1.67e-16	1.59e-15	2
TELO2	0.734405	2.56e-16	2.39e-15	2
SLIT3	-1.22828	2.99e-16	2.76e-15	2
MUC15	-2.13928	3.08e-16	2.84e-15	2
EVPL	0.626978	3.99e-16	3.63e-15	2
SIX1	1.26418	4.77e-16	4.29e-15	2
CIT	1.06032	8.46e-16	7.4e-15	2
DNAH5	2.19918	8.71e-16	7.6e-15	2
DPYD	-1.07758	9.17e-16	7.99e-15	2
PCDH10	-1.43632	1.5e-15	1.28e-14	2
ZC3H13	-0.694057	3.41e-15	2.79e-14	2
KIF26B	-1.18971	4.03e-15	3.27e-14	2
PLEKHA6	-0.77518	5.38e-15	4.3e-14	2
ILDR2	-1.10287	5.7e-15	4.54e-14	2
JAK1	-0.612611	8.09e-15	6.37e-14	2
SETBP1	-0.853835	1.52e-14	1.16e-13	2
FAS	-0.841107	1.59e-14	1.2e-13	2
MAST2	0.613615	1.69e-14	1.28e-13	2
MTUS1	-0.664172	2.08e-14	1.56e-13	2
CEP85L	-0.67882	2.1e-14	1.57e-13	2
RHBDD1	-0.346887	2.17e-14	1.62e-13	2
CFH	-1.10945	2.43e-14	1.8e-13	2
PNPLA7	0.890216	2.79e-14	2.05e-13	2
PPFIBP1	-0.646863	3.05e-14	2.23e-13	2
NEFM	-2.12474	3.82e-14	2.76e-13	2
WSB2	0.592944	4.29e-14	3.08e-13	2
PEX6	0.621005	4.36e-14	3.13e-13	2
AKAP6	-0.98321	6.79e-14	4.78e-13	2
MMP26	3.05223	1.2e-13	8.17e-13	2
ACACA	0.742064	1.72e-13	1.16e-12	2
ACTA1	-2.42537	2.01e-13	1.34e-12	2
POLQ	1.33837	2.23e-13	1.48e-12	2
REC8	-0.912239	2.53e-13	1.66e-12	2
TG	-1.74276	2.55e-13	1.67e-12	2
DDIT4	-1.06623	2.8e-13	1.83e-12	2
COMP	3.09008	3.32e-13	2.15e-12	2
ATP10D	-0.775249	3.84e-13	2.46e-12	2
SKIV2L	0.351406	4.54e-13	2.88e-12	2
TTBK2	-0.532934	5.52e-13	3.46e-12	2
PRDM15	0.361171	6.34e-13	3.94e-12	2
KANSL1L	-0.565876	7.22e-13	4.46e-12	2
BNC1	-1.75369	8.67e-13	5.33e-12	2
CACNA1D	1.9956	1.08e-12	6.55e-12	2
SRSF1	0.278639	2.45e-12	1.43e-11	2
TRPS1	-0.741972	3.09e-12	1.78e-11	2
FAM98C	0.506272	4e-12	2.26e-11	2
POLG2	0.519833	4.62e-12	2.59e-11	2
CMYA5	-1.03894	4.64e-12	2.6e-11	2
WFS1	-0.618249	5.2e-12	2.9e-11	2
SEMA3E	-1.25321	5.46e-12	3.03e-11	2
TAF15	0.322619	5.55e-12	3.08e-11	2
PRDM16	-1.06324	7.77e-12	4.23e-11	2
HIPK3	-0.493408	8.68e-12	4.71e-11	2
MTMR7	-0.618675	8.98e-12	4.86e-11	2
CKAP2L	1.35925	1.01e-11	5.42e-11	2
THSD4	-1.15389	1.13e-11	6.02e-11	2
FCGBP	-1.43735	1.18e-11	6.3e-11	2
GLI2	-0.954228	1.28e-11	6.78e-11	2
KDM4B	0.445425	1.34e-11	7.1e-11	2
EIF4G1	0.415363	1.54e-11	8.04e-11	2
LRRC49	-0.431386	2.04e-11	1.05e-10	2
PER3	-0.785307	2.44e-11	1.25e-10	2
ANKS3	0.669258	4.32e-11	2.13e-10	2
TRIM31	-1.35756	4.61e-11	2.26e-10	2
ECE2	0.745847	5.28e-11	2.57e-10	2
DNMT3A	0.469145	5.67e-11	2.75e-10	2
FILIP1L	-1.16916	6.46e-11	3.1e-10	2
SLC25A27	1.22438	6.47e-11	3.11e-10	2
TMEM71	-0.907054	7.49e-11	3.58e-10	2
DCLRE1C	-0.379151	9.15e-11	4.32e-10	2
TXNIP	-0.690775	9.34e-11	4.4e-10	2
IPO8	-0.331115	9.51e-11	4.48e-10	2
SSH3	-0.462361	1.01e-10	4.73e-10	2
MPDZ	-0.597734	1.07e-10	5e-10	2
ISM2	-1.39205	1.23e-10	5.71e-10	2
CCDC81	-0.716509	1.35e-10	6.23e-10	2
CDCA2	1.12497	1.61e-10	7.34e-10	2
SLC12A5	1.41916	1.62e-10	7.42e-10	2
COL27A1	-1.0041	1.79e-10	8.11e-10	2
TRAF2	0.455483	1.84e-10	8.36e-10	2
ACAD10	0.412134	3.6e-10	1.57e-09	2
LARP1	0.359728	7.04e-10	2.96e-09	2
HOOK2	0.53634	1.27e-09	5.16e-09	2
NDST2	0.331071	1.43e-09	5.78e-09	2
FES	-0.640122	1.66e-09	6.65e-09	2
VWA8	-0.512531	2.45e-09	9.65e-09	2
MTG2	0.300657	2.47e-09	9.75e-09	2
KIAA2026	-0.431378	2.74e-09	1.08e-08	2
ZNF146	0.389394	3.08e-09	1.2e-08	2
NPHP4	0.410394	3.21e-09	1.25e-08	2
DOPEY2	0.616884	3.41e-09	1.32e-08	2
DSCC1	0.6679	3.82e-09	1.47e-08	2
POLE	0.329454	4.33e-09	1.66e-08	2
SDK1	1.38416	4.46e-09	1.71e-08	2
PRRC2A	0.342794	4.79e-09	1.83e-08	2
MMP9	1.78468	4.94e-09	1.88e-08	2
CNTN2	-1.12459	5.23e-09	1.99e-08	2
AVPR1A	-0.969008	5.25e-09	1.99e-08	2
KIAA0319L	0.429257	5.72e-09	2.16e-08	2
TIAM2	-0.322158	6.87e-09	2.57e-08	2
GRHL3	-0.93215	7.06e-09	2.64e-08	2
CAD	0.371899	7.41e-09	2.77e-08	2
TJP2	-0.440382	7.49e-09	2.8e-08	2
GPI	0.381811	9e-09	3.32e-08	2
FAM71F2	0.890002	9.78e-09	3.59e-08	2
DACT1	-0.762445	1.21e-08	4.39e-08	2
CLK2	0.373374	1.28e-08	4.62e-08	2
TRIM62	0.38968	1.28e-08	4.63e-08	2
SNX31	-1.31834	1.35e-08	4.88e-08	2
TCF7L2	-0.370434	1.43e-08	5.15e-08	2
PEX2	-0.349275	1.49e-08	5.31e-08	2
PFKP	-0.519904	1.66e-08	5.89e-08	2
KIF5A	-0.958628	1.78e-08	6.29e-08	2
ETV3	-0.44895	1.82e-08	6.43e-08	2
HHIP	-1.16946	2.09e-08	7.32e-08	2
CLASRP	0.528935	2.96e-08	1.02e-07	2
ZCCHC14	-0.359844	3.58e-08	1.22e-07	2
DNAH1	0.629092	3.62e-08	1.23e-07	2
CCT6P3	0.508994	4.37e-08	1.48e-07	2
DDX50	-0.203347	4.42e-08	1.49e-07	2
SMPD2	0.543582	4.43e-08	1.5e-07	2
NBEAL2	0.515797	5.25e-08	1.75e-07	2
PTPN9	-0.25197	5.23e-08	1.75e-07	2
PDE8A	-0.284618	6.11e-08	2.03e-07	2
BBS9	-0.252077	6.19e-08	2.05e-07	2
DGKI	-0.766401	8.81e-08	2.86e-07	2
MIIP	0.542157	9.03e-08	2.92e-07	2
CS	0.263961	9.19e-08	2.97e-07	2
MBD1	-0.227999	9.49e-08	3.06e-07	2
TTLL11	-0.292033	1.02e-07	3.28e-07	2
USP12	-0.302351	1.04e-07	3.33e-07	2
SNCAIP	-0.853796	1.05e-07	3.38e-07	2
LAMA3	-0.91673	1.09e-07	3.49e-07	2
IRS1	-0.769785	1.1e-07	3.51e-07	2
TARS2	0.250867	1.2e-07	3.82e-07	2
ZRANB1	-0.461693	1.29e-07	4.1e-07	2
OSBPL3	-0.679611	1.36e-07	4.3e-07	2
ARSB	-0.426151	1.37e-07	4.33e-07	2
SUGP2	0.320102	2.09e-07	6.43e-07	2
GSDMB	0.898655	2.21e-07	6.8e-07	2
LONRF1	-0.440801	2.36e-07	7.21e-07	2
SOX6	-0.689798	2.43e-07	7.41e-07	2
HIST2H2BF	1.13611	3.12e-07	9.38e-07	2
ERCC2	0.318319	4.1e-07	1.21e-06	2
HECTD4	0.490259	4.43e-07	1.3e-06	2
TMEM176A	-0.737673	5.55e-07	1.61e-06	2
L3HYPDH	0.530217	6.23e-07	1.8e-06	2
KAT6B	-0.455711	6.3e-07	1.82e-06	2
IRF8	-0.746585	8.51e-07	2.41e-06	2
ARSE	-0.773253	1.02e-06	2.86e-06	2
ATP8B4	-0.953068	1.32e-06	3.65e-06	2
MOSPD3	0.375882	1.38e-06	3.81e-06	2
COL6A1	-0.703263	1.38e-06	3.82e-06	2
KCTD10	-0.332366	1.43e-06	3.94e-06	2
LTBR	0.310803	1.59e-06	4.35e-06	2
DUS3L	0.360809	1.66e-06	4.55e-06	2
NUDT12	-0.513037	1.8e-06	4.89e-06	2
SUPT5H	0.206977	1.85e-06	5.04e-06	2
RAB37	-0.592331	2.05e-06	5.53e-06	2
ANKRD52	0.349963	2.25e-06	6.04e-06	2
DNER	-1.01385	2.38e-06	6.39e-06	2
PAK6	-0.855652	2.48e-06	6.62e-06	2
NTNG2	-0.81756	2.79e-06	7.43e-06	2
ZBTB32	0.700906	2.98e-06	7.89e-06	2
SETX	-0.329603	3.37e-06	8.88e-06	2
PHF3	-0.334257	3.42e-06	8.99e-06	2
HSPG2	-0.842419	3.54e-06	9.3e-06	2
DHX38	-0.268819	3.57e-06	9.36e-06	2
MYO15A	-0.505475	3.85e-06	1e-05	2
ZNF366	-0.891731	3.87e-06	1.01e-05	2
RYR1	-0.824409	4.17e-06	1.08e-05	2
LCN2	-1.50777	4.16e-06	1.08e-05	2
LIMCH1	-0.437722	4.28e-06	1.11e-05	2
ALOX15	2.17351	4.41e-06	1.14e-05	2
UHRF1BP1L	-0.339982	4.76e-06	1.23e-05	2
HP1BP3	-0.215735	5.11e-06	1.31e-05	2
KIAA1211	-0.870859	5.48e-06	1.4e-05	2
COL6A3	-0.771524	6.12e-06	1.55e-05	2
DLEC1	-0.661206	6.47e-06	1.64e-05	2
XPR1	-0.304486	7.1e-06	1.79e-05	2
USP34	-0.703093	7.58e-06	1.9e-05	2
ALS2CL	-0.639315	7.63e-06	1.91e-05	2
MKS1	0.202547	7.63e-06	1.91e-05	2
COL11A2	0.775627	8.66e-06	2.15e-05	2
PHIP	-0.355878	9.31e-06	2.3e-05	2
PIK3CD	-0.534932	1.03e-05	2.54e-05	2
ESYT2	-0.27043	1.04e-05	2.56e-05	2
KLHL20	-0.415663	1.2e-05	2.93e-05	2
ATF2	-0.27639	1.4e-05	3.39e-05	2
DEPDC5	-0.189066	1.46e-05	3.53e-05	2
CDH24	0.375105	1.63e-05	3.9e-05	2
JUP	0.279403	1.71e-05	4.08e-05	2
DISP1	-0.367466	1.82e-05	4.31e-05	2
LIG1	0.287922	1.88e-05	4.45e-05	2
AKAP8L	0.293369	1.9e-05	4.5e-05	2
TOP3A	0.21393	1.94e-05	4.58e-05	2
LAMB1	-0.586451	2.02e-05	4.76e-05	2
FN1	-0.80782	2.17e-05	5.09e-05	2
KIAA1551	-0.356984	2.25e-05	5.26e-05	2
IFIT2	-0.58523	2.46e-05	5.71e-05	2
SAMD9	-0.605149	2.65e-05	6.12e-05	2
MYO1D	0.304534	2.69e-05	6.2e-05	2
RHOBTB3	-0.449777	3.52e-05	7.99e-05	2
MAOA	0.53005	4.29e-05	9.61e-05	2
SP1	-0.244784	4.33e-05	9.7e-05	2
PTPRG	-0.40325	5.13e-05	0.000113825	2
VAV1	-0.545403	5.44e-05	0.00012013	2
CROCCP2	0.39745	6.05e-05	0.000132796	2
NR1D2	-0.357304	6.76e-05	0.000147726	2
SUCO	-0.309682	6.94e-05	0.000151428	2
NOTCH2NL	-0.54541	7.36e-05	0.000159904	2
UHRF1BP1	0.321471	7.61e-05	0.000164898	2
KL	-1.01389	7.73e-05	0.000167342	2
FUT8	-0.293641	7.78e-05	0.000168348	2
PLEKHS1	0.868888	7.79e-05	0.00016862	2
PDS5B	-0.348215	7.92e-05	0.000171129	2
PRPF40B	-0.269698	7.99e-05	0.000172625	2
CYB5R4	-0.277502	8.25e-05	0.000177697	2
MDM4	0.258434	9.95e-05	0.000211975	2
PASK	0.440777	0.000106137	0.00022528	2
EXOC4	-0.173141	0.000115737	0.000244531	2
DOCK11	-0.45778	0.000119442	0.000251839	2
MBD6	0.213672	0.000120462	0.000253816	2
GAPVD1	-0.189816	0.000121753	0.00025636	2
SRRD	-0.156114	0.000122179	0.00025714	2
DNAH17	0.404958	0.000163622	0.000339477	2
VPS35	-0.208898	0.000175728	0.000363203	2
CD83	-0.378031	0.000177432	0.000366313	2
GRIN3A	1.41508	0.000183748	0.000378505	2
CYC1	0.30191	0.000186536	0.000384034	2
MYSM1	0.367111	0.000194721	0.000399725	2
IFT81	-0.208442	0.000200831	0.000411442	2
TBX3	-0.403362	0.000207547	0.000424398	2
CTNNAL1	0.286792	0.000208719	0.000426565	2
ZNF816	-0.225794	0.000217491	0.000443208	2
ALMS1	-0.268521	0.00022056	0.000449212	2
KRIT1	-0.236191	0.000228177	0.000463599	2
PCDHB2	1.04643	0.000230051	0.00046715	2
TFAP2E	0.482959	0.000233565	0.000473554	2
PAQR4	0.451709	0.000234135	0.000474658	2
AKT1	0.183641	0.000240161	0.000486392	2
LTBP3	-0.357641	0.000244418	0.000494416	2
MS4A14	0.624729	0.000254078	0.000512719	2
KDM3B	-0.240138	0.000259455	0.000522769	2
ZBTB34	0.276783	0.000277663	0.000557444	2
SNX4	0.249429	0.000283936	0.000568922	2
ADCY2	-0.561301	0.0003106	0.000619184	2
ABCC5	0.342417	0.000313169	0.000623833	2
PAPLN	-0.454286	0.000326291	0.00064864	2
MED12	-0.26233	0.00034009	0.000674471	2
LDLR	-0.523031	0.00034048	0.000675099	2
PLK3	-0.452875	0.000343672	0.000681207	2
SCAF8	-0.247696	0.00035142	0.000695743	2
ENPP2	-0.496514	0.000362367	0.000715954	2
CACNA1A	-0.504855	0.000372014	0.000734226	2
UBQLNL	-0.562245	0.000372109	0.000734336	2
SLITRK4	-0.928026	0.000381866	0.000752542	2
KCNH8	1.17604	0.00038229	0.000753298	2
ABCA4	-0.608168	0.000388612	0.000763877	2
URB2	0.283164	0.00041405	0.000810163	2
LRFN3	0.214647	0.000425479	0.000831113	2
DZIP1L	-0.413098	0.000460384	0.000894743	2
CCT4	0.202623	0.000478864	0.000928603	2
CILP	-0.563672	0.000505274	0.000976265	2
RIF1	-0.256665	0.000544556	0.00104816	2
SP3	-0.233986	0.000580956	0.00111484	2
ZNF148	-0.242284	0.00060935	0.0011669	2
SF3A1	-0.17666	0.000634422	0.00121277	2
SHKBP1	-0.226662	0.000643477	0.00122874	2
ZFAT	0.192539	0.000666137	0.00127009	2
KAT6A	-0.340562	0.000721259	0.00136742	2
MTMR3	0.199761	0.000753435	0.00142432	2
PKDREJ	-0.412024	0.000845438	0.00158475	2
PRKD2	0.186591	0.000885119	0.00165476	2
KDM4C	0.147358	0.000897233	0.00167639	2
ZZEF1	-0.222969	0.000923075	0.0017217	2
ANKH	0.371028	0.00103111	0.00190737	2
TYW1	0.149086	0.00105262	0.00194444	2
ZNF799	0.21651	0.00120569	0.0022064	2
PDP1	0.303764	0.00120834	0.00221058	2
ITGA10	0.410933	0.00138506	0.0025122	2
CNOT4	-0.142717	0.00139299	0.00252534	2
KANSL1	-0.202374	0.00143409	0.00259423	2
ANKHD1	0.203438	0.00153862	0.00276999	2
PRMT3	0.194183	0.00162263	0.0029127	2
KEAP1	0.160651	0.00164292	0.00294626	2
GCC1	0.158181	0.00167333	0.00299584	2
FAM171A1	0.289373	0.00176254	0.00314577	2
ADAMTS10	-0.393791	0.00179138	0.00319385	2
RELN	0.7862	0.00181683	0.0032361	2
SHANK2	0.329908	0.00183018	0.00325861	2
ROBO4	-0.359454	0.0018567	0.00330358	2
USP30	-0.141434	0.00198862	0.00352166	2
RPL10A	0.240518	0.00205394	0.00362896	2
BCOR	0.315578	0.00206764	0.00365246	2
THTPA	0.214193	0.00211856	0.00373632	2
NUP188	0.149148	0.00214115	0.00377255	2
LMTK2	0.242888	0.00243049	0.00424581	2
SEZ6L	-0.806041	0.00251934	0.00438938	2
CENPP	0.238362	0.00258617	0.00449815	2
STAT3	-0.212689	0.00277514	0.00480416	2
DYRK1A	-0.141358	0.00279408	0.00483513	2
ALKBH1	-0.127383	0.00281314	0.00486446	2
SACM1L	-0.155523	0.00291331	0.0050254	2
SLC44A5	1.13525	0.00309693	0.00532173	2
PPP1R16A	0.343142	0.00346067	0.00590057	2
HSP90AA1	-0.216719	0.00346506	0.00590749	2
ITFG1	-0.218155	0.00354922	0.00604314	2
VHL	0.22331	0.00358331	0.00609669	2
ENO1	0.224646	0.00368145	0.00625559	2
TTLL3	0.377434	0.00371418	0.00630712	2
CAMTA1	-0.162294	0.00380432	0.00644793	2
ZNF281	0.223619	0.00391924	0.00662604	2
ORMDL1	0.157217	0.0039454	0.00666109	2
RYR3	-0.324745	0.00408315	0.0068798	2
RAB33B	-0.193937	0.00412513	0.00694354	2
SDHC	-0.124999	0.00441991	0.00740387	2
CDC42BPB	-0.187535	0.00468665	0.00782155	2
CDKN1B	-0.179315	0.00473251	0.00788809	2
ACTR3	-0.163544	0.00479966	0.00798917	2
SLC38A11	0.810123	0.00492753	0.00819091	2
DNMT1	0.178561	0.00494283	0.00821414	2
CEBPZ	-0.140548	0.00496653	0.00825128	2
APPBP2	-0.170568	0.0051133	0.00847449	2
WNK1	-0.240825	0.00515857	0.00854413	2
CNTN4	-0.454672	0.0052436	0.00867173	2
ARHGEF11	-0.204311	0.00543133	0.00895967	2
ZNF518B	-0.23921	0.00551966	0.0090948	2
GMPPB	0.239085	0.0055212	0.00909653	2
ARHGAP21	-0.202103	0.00553685	0.00911986	2
FAM83F	-0.383392	0.00556323	0.0091584	2
KIAA0753	-0.139336	0.0057881	0.00950398	2
SHPRH	-0.419464	0.00592936	0.0097212	2
FANCM	-0.192841	0.00597473	0.00978948	2
CASC1	-0.318519	0.00601617	0.00985213	2
GLDC	1.03516	0.00708373	0.0114578	2
CA2	-0.591717	0.00742737	0.0119737	2
GRIP2	-0.459945	0.00873832	0.0139107	2
FNDC1	0.659097	0.00883806	0.0140646	2
SELP	-0.35938	0.00936273	0.0148367	2
ZNF318	-0.1777	0.00958688	0.0151523	2
CD1C	-0.475682	0.0100393	0.0158109	2
ARHGAP26	-0.257655	0.01013	0.0159429	2
ZSCAN31	-0.237671	0.0104517	0.0164113	2
BRD1	0.110048	0.0133212	0.0205666	2
ZNF770	-0.399843	0.0138461	0.0213269	2
NAA20	0.137604	0.0146877	0.0225309	2
CPS1	-0.684316	0.014866	0.0227837	2
ZNF616	0.15193	0.014946	0.0228948	2
IFT122	0.129512	0.0150123	0.022985	2
ZNF134	-0.0971042	0.0157608	0.024067	2
EIF2AK3	0.19176	0.0173587	0.0263	2
BIRC6	-0.224385	0.0182375	0.027516	2
ISLR	-0.33516	0.0202854	0.0303375	2
TENM1	0.764866	0.0211461	0.0315046	2
PHACTR4	-0.122305	0.021563	0.0320816	2
PGBD1	-0.126343	0.0216899	0.032247	2
CEP76	-0.143082	0.0218114	0.0324145	2
CDH6	-0.34088	0.02195	0.0326022	2
CD163	0.407475	0.0230726	0.034143	2
RETSAT	-0.161128	0.0232554	0.0343886	2
COL12A1	0.480127	0.0237098	0.0350072	2
ZNF131	0.118652	0.0239331	0.0353086	2
LOXL3	-0.214749	0.0245383	0.0361348	2
MYLIP	0.157492	0.024755	0.0364219	2
SI	0.888613	0.025043	0.0368046	2
ZSWIM5	-0.161083	0.0265938	0.0388852	2
IL16	-0.305172	0.0267888	0.0391487	2
RIMBP2	-0.498539	0.0281256	0.0409269	2
POLR2B	-0.136616	0.0294462	0.0426969	2
TRIM5	-0.182594	0.0294544	0.0427054	2
ZNF608	-0.308709	0.0296923	0.04303	2
ZNF638	0.087835	0.0299747	0.0434222	2
SPEN	-0.18225	0.0306186	0.0442854	2
C19orf57	-0.217199	0.0321419	0.046343	2
DDX43	-0.605769	0.0333748	0.0479445	2
CA14	-3.01384	1.16e-63	1.07e-59	1
GCNT4	-2.37141	4.85e-57	2.24e-53	1
ANGPT1	-2.66022	3.05e-55	9.36e-52	1
PPARGC1A	-2.57425	3.98e-55	1.05e-51	1
IGSF1	-3.51649	1.75e-54	3.58e-51	1
SLC2A9	-1.97915	3.89e-53	5.51e-50	1
JPH4	-2.81852	3.9e-50	3.42e-47	1
LGR6	-3.13183	3.03e-48	2.07e-45	1
GNAO1	-2.3381	6.57e-48	4.32e-45	1
UBXN10	-2.48202	4.1e-46	2.29e-43	1
STOX2	-1.95619	4.28e-46	2.32e-43	1
MAMLD1	-1.89563	1.03e-44	4.51e-42	1
GNAZ	-1.82861	6.81e-44	2.56e-41	1
CXCR2	-3.0178	1.6e-43	5.79e-41	1
KCTD14	-2.32601	2.39e-43	8.46e-41	1
SRD5A2	-2.73829	3.37e-43	1.11e-40	1
GSTM3	-2.13635	6.52e-43	1.97e-40	1
PDE1C	-2.89481	8.13e-43	2.42e-40	1
STAC	-2.94017	1.46e-42	4.21e-40	1
L3MBTL4	-2.01072	2.45e-42	6.93e-40	1
HRASLS5	-2.64816	9.44e-42	2.32e-39	1
CCBE1	-2.77192	2.85e-41	6.66e-39	1
NRG2	-2.34026	5.39e-41	1.21e-38	1
PYCR1	1.51236	5.41e-41	1.21e-38	1
DUOX1	-2.35505	1.81e-40	3.94e-38	1
ARHGAP20	-2.12546	1.87e-40	4.01e-38	1
ZNF154	-1.75436	2.14e-40	4.48e-38	1
KLHL14	-2.51756	1.9e-39	3.72e-37	1
PLEKHA2	-1.41384	1.15e-37	1.78e-35	1
EPM2A	-0.944961	4.49e-36	5.44e-34	1
CCDC8	-1.7855	7.62e-36	8.94e-34	1
EPHA10	2.22431	1.44e-35	1.62e-33	1
C22orf23	-1.31985	2.02e-35	2.19e-33	1
GSTM5	-1.99575	2.69e-35	2.83e-33	1
ACSS3	-1.67354	4.38e-35	4.41e-33	1
ABHD6	-0.956536	4.62e-35	4.61e-33	1
B3GNT9	-1.40395	5.79e-35	5.74e-33	1
TMEM246	-2.06303	9.45e-35	9.12e-33	1
ADAMTS5	-2.02303	1.14e-34	1.08e-32	1
ST6GALNAC4	-1.43397	1.41e-34	1.33e-32	1
MCC	-1.71474	1.57e-34	1.47e-32	1
NCAM1	-2.35495	4.2e-34	3.6e-32	1
TRPM4	1.72629	5.22e-34	4.41e-32	1
RBP1	-1.73853	1.22e-33	9.81e-32	1
TRIM36	1.78657	1.36e-33	1.08e-31	1
GOLM1	1.93902	1.55e-33	1.22e-31	1
KCNAB1	-1.8928	2.37e-33	1.81e-31	1
STAT5B	-0.654774	2.37e-33	1.81e-31	1
DAB1	-2.32055	3.85e-33	2.83e-31	1
DNAJB4	-1.46322	1.23e-32	8.53e-31	1
MAMDC2	-1.79605	1.65e-32	1.13e-30	1
CCDC85A	-2.13204	3.26e-32	2.12e-30	1
LRRN3	-2.29002	4.03e-32	2.6e-30	1
ANKMY2	-0.638278	2.04e-31	1.2e-29	1
SH3PXD2B	-1.26829	2.44e-31	1.41e-29	1
RBFOX1	-2.73111	2.87e-31	1.65e-29	1
CCDC69	-1.56258	4.64e-31	2.59e-29	1
KCNQ5	-1.95281	5.16e-31	2.85e-29	1
CHST2	-1.6284	5.47e-31	3.02e-29	1
FERMT2	-1.43472	3.2e-30	1.6e-28	1
KLHL13	-1.28773	3.29e-30	1.63e-28	1
SSBP2	-0.832578	3.3e-30	1.63e-28	1
RASL12	-1.92318	3.3e-30	1.63e-28	1
GLDN	-2.21611	3.51e-30	1.72e-28	1
TMEM132A	1.9425	5.05e-30	2.44e-28	1
PRDM8	-2.2926	5.17e-30	2.49e-28	1
ITGA2	-1.58018	8.16e-30	3.9e-28	1
ICA1L	-0.855045	1.1e-29	5.18e-28	1
HJURP	2.75055	1.33e-29	6.13e-28	1
PGAP1	-1.12578	3.16e-29	1.4e-27	1
PPARGC1B	-1.31304	3.2e-29	1.41e-27	1
TMEM184A	1.36865	3.3e-29	1.45e-27	1
FGF7	-1.93422	3.98e-29	1.73e-27	1
MBNL2	-1.35469	4.44e-29	1.93e-27	1
NUP210	1.21381	6.17e-29	2.63e-27	1
CA12	-1.6144	7.04e-29	2.99e-27	1
FGFR2	-2.17421	8.24e-29	3.47e-27	1
MEN1	0.63304	1.05e-28	4.34e-27	1
GTSE1	2.21439	1.47e-28	6.01e-27	1
HOXC4	3.54135	1.78e-28	7.2e-27	1
ROR2	-1.81887	2.86e-28	1.13e-26	1
SERPINB5	-2.56376	3.64e-28	1.42e-26	1
VIT	-2.27496	5.12e-28	1.95e-26	1
PLA2G4A	-1.44916	5.93e-28	2.24e-26	1
TRAF3IP2	-1.08945	1.36e-27	5.01e-26	1
IQCA1	-1.75432	1.46e-27	5.33e-26	1
SCARA5	-2.75913	1.9e-27	6.83e-26	1
HOXB13	1.85883	2.36e-27	8.38e-26	1
FOXQ1	-2.0329	2.85e-27	9.97e-26	1
VWCE	-1.53831	3.21e-27	1.12e-25	1
ANK2	-1.61503	4.34e-27	1.49e-25	1
PCDH9	-1.71956	4.42e-27	1.51e-25	1
PDGFD	-1.31995	4.64e-27	1.58e-25	1
SPON1	-1.83299	4.89e-27	1.65e-25	1
SLC16A4	-1.17681	7.2e-27	2.39e-25	1
PRTFDC1	-1.38379	7.32e-27	2.42e-25	1
ELP3	-0.74473	9.77e-27	3.15e-25	1
TRPM3	-1.91742	1.05e-26	3.38e-25	1
SLC8A1	-1.7781	1.29e-26	4.06e-25	1
LSM11	-0.807442	1.49e-26	4.64e-25	1
CD40	-1.35168	2.25e-26	6.95e-25	1
GJB5	-2.65506	2.32e-26	7.11e-25	1
CKMT2	-1.51199	2.8e-26	8.53e-25	1
MDFIC	-1.1356	2.99e-26	9.04e-25	1
CPEB1	-1.5359	3.43e-26	1.03e-24	1
CDC42EP3	-1.2889	3.45e-26	1.03e-24	1
STARD8	-1.36542	3.82e-26	1.14e-24	1
FER	-0.916428	4.82e-26	1.41e-24	1
CSRP1	-1.76169	5.49e-26	1.6e-24	1
BIRC5	2.40474	5.69e-26	1.65e-24	1
TTYH3	0.982282	7.05e-26	2.01e-24	1
MAGI2	-0.938229	7.82e-26	2.22e-24	1
PDK2	-0.813543	8.11e-26	2.3e-24	1
CHRDL1	-2.46716	8.81e-26	2.48e-24	1
RNASEL	-0.724894	8.88e-26	2.49e-24	1
KSR1	-1.26483	1.62e-25	4.46e-24	1
DCBLD2	-0.903211	1.65e-25	4.51e-24	1
CCSER2	-0.781206	1.93e-25	5.25e-24	1
LPIN1	-0.868603	2.01e-25	5.45e-24	1
KCNJ5	-1.61806	2.77e-25	7.42e-24	1
SPATA6	-1.24879	2.84e-25	7.59e-24	1
SNAPC1	-0.52923	2.97e-25	7.89e-24	1
ZNF804A	-1.96693	3.04e-25	8.07e-24	1
PBX1	-1.06353	4.05e-25	1.06e-23	1
NR3C2	-0.933645	4.29e-25	1.12e-23	1
C11orf70	-1.49618	5.67e-25	1.46e-23	1
ATAD3C	-1.54855	5.68e-25	1.46e-23	1
EIF2AK1	0.633647	5.74e-25	1.48e-23	1
BNC2	-1.44149	1.02e-24	2.54e-23	1
BUB1B	1.74261	1.07e-24	2.67e-23	1
GNB5	-0.742891	1.08e-24	2.69e-23	1
SSX2IP	-0.629145	1.48e-24	3.64e-23	1
TSPAN2	-1.38485	1.55e-24	3.78e-23	1
SLC18A2	-2.5451	1.87e-24	4.52e-23	1
TENM3	-1.56036	2.46e-24	5.87e-23	1
DDO	-1.46348	2.55e-24	6.06e-23	1
ZNF846	-0.632247	2.66e-24	6.31e-23	1
KIF18B	2.27645	3.57e-24	8.38e-23	1
TBC1D1	-1.06377	4.96e-24	1.16e-22	1
PRPH2	-1.62126	5.02e-24	1.17e-22	1
KRT23	-2.71152	5.36e-24	1.24e-22	1
APOBEC3D	-1.50741	5.64e-24	1.3e-22	1
MYOF	-1.69172	5.68e-24	1.31e-22	1
LRRC17	-1.16657	6.24e-24	1.43e-22	1
SRPX	-1.51153	6.69e-24	1.52e-22	1
TP53INP1	1.12488	6.94e-24	1.58e-22	1
EVC2	-1.31112	7.49e-24	1.69e-22	1
TRIP13	1.43855	1.42e-23	3.13e-22	1
CYP27A1	-2.05543	1.63e-23	3.56e-22	1
C14orf159	-1.24966	1.81e-23	3.94e-22	1
ITGA9	-1.40292	2.33e-23	4.99e-22	1
KANK4	-2.02564	3.01e-23	6.4e-22	1
C21orf62	-2.12698	5.77e-23	1.19e-21	1
PI16	-2.7242	5.78e-23	1.19e-21	1
EDNRA	-1.50719	5.96e-23	1.22e-21	1
TTLL12	0.84092	7.04e-23	1.43e-21	1
SLC12A8	1.07406	7.18e-23	1.46e-21	1
RANBP17	0.826968	8e-23	1.62e-21	1
ABCC4	1.76215	8.4e-23	1.69e-21	1
TPX2	1.96992	9.48e-23	1.9e-21	1
ANXA6	-1.34825	9.9e-23	1.98e-21	1
PROM1	-2.33302	1.07e-22	2.13e-21	1
PEAK1	-1.30552	1.09e-22	2.18e-21	1
CCNJL	-1.46741	1.15e-22	2.3e-21	1
PDK4	-2.35076	1.22e-22	2.42e-21	1
CPED1	-1.67204	1.4e-22	2.75e-21	1
CHTF18	1.35146	1.49e-22	2.93e-21	1
PRKCA	-1.33477	2.13e-22	4.11e-21	1
ZDHHC15	-1.47211	2.94e-22	5.6e-21	1
CCDC82	-0.780466	3.11e-22	5.89e-21	1
ZDHHC9	0.782185	3.29e-22	6.21e-21	1
PCSK2	-2.39938	3.57e-22	6.7e-21	1
BDNF	-1.68317	4.11e-22	7.67e-21	1
TEAD1	-1.1212	4.11e-22	7.67e-21	1
RNF217-AS1	-1.0581	4.43e-22	8.23e-21	1
SCARB1	0.761729	5.16e-22	9.52e-21	1
SLC12A7	0.603489	5.56e-22	1.02e-20	1
ACSS1	0.807642	6.79e-22	1.22e-20	1
EPB41L1	-0.65944	7.03e-22	1.26e-20	1
BCAR3	-0.874856	7.06e-22	1.27e-20	1
GNAI2	-0.684594	8.52e-22	1.51e-20	1
ZNF483	-1.10747	1.03e-21	1.8e-20	1
PEG10	-1.85979	1.02e-21	1.8e-20	1
PDLIM5	1.66704	1.36e-21	2.35e-20	1
CYP4F3	-1.88126	1.52e-21	2.6e-20	1
FOXP2	-1.57275	1.84e-21	3.12e-20	1
KIF20A	1.99012	2.45e-21	4.1e-20	1
C2orf40	-1.68119	5.29e-21	8.59e-20	1
DSTN	-0.712308	5.61e-21	9.08e-20	1
TRIM35	-0.672004	6.76e-21	1.08e-19	1
KRT16	-2.44111	8.11e-21	1.28e-19	1
AOC1	-3.27379	8.43e-21	1.32e-19	1
MPHOSPH8	-0.415901	9.33e-21	1.46e-19	1
TACC1	-1.20929	1.07e-20	1.66e-19	1
ZNF485	0.751786	1.15e-20	1.78e-19	1
HOXB2	-1.32073	1.21e-20	1.87e-19	1
SORBS1	-1.92974	1.39e-20	2.14e-19	1
NXPE3	-0.87803	1.42e-20	2.19e-19	1
OXR1	-0.815387	1.52e-20	2.33e-19	1
SLC27A4	0.806358	1.77e-20	2.69e-19	1
HID1	0.796879	1.83e-20	2.78e-19	1
ESRP1	0.796416	1.89e-20	2.87e-19	1
MSI1	1.15086	1.92e-20	2.92e-19	1
PPP1R3B	-0.805195	1.94e-20	2.94e-19	1
LPP	-1.03579	3.2e-20	4.76e-19	1
FZD7	-1.15709	3.29e-20	4.89e-19	1
NKX3-1	1.37722	3.3e-20	4.9e-19	1
MOB3C	-0.615692	3.73e-20	5.51e-19	1
KLHL5	-1.00271	3.82e-20	5.64e-19	1
DPH2	0.60695	3.94e-20	5.8e-19	1
FLRT3	-1.95973	4.01e-20	5.89e-19	1
CELF2	-1.28071	4.04e-20	5.92e-19	1
NAGS	-0.998971	4.4e-20	6.43e-19	1
OGT	0.9271	5.48e-20	7.94e-19	1
ASPN	2.12571	5.93e-20	8.58e-19	1
MRVI1	-1.59099	5.92e-20	8.58e-19	1
RIPK2	0.892267	8.05e-20	1.15e-18	1
FASN	1.42447	8.28e-20	1.18e-18	1
CCDC136	-1.09249	8.48e-20	1.21e-18	1
CES1	-1.72873	8.77e-20	1.25e-18	1
CCDC40	0.94557	1.09e-19	1.55e-18	1
COPZ2	-1.13683	1.14e-19	1.61e-18	1
SLC7A4	-2.74022	1.18e-19	1.66e-18	1
NTRK3	-1.60345	1.2e-19	1.69e-18	1
AMOT	-1.33075	1.41e-19	1.97e-18	1
SNRPA1	0.591005	1.53e-19	2.13e-18	1
ACTRT3	-0.833268	1.67e-19	2.31e-18	1
DUS1L	0.981693	1.78e-19	2.46e-18	1
LAMB3	-2.39744	1.84e-19	2.53e-18	1
PTGS2	-2.25766	2.06e-19	2.81e-18	1
WDR90	0.84616	2.16e-19	2.93e-18	1
SS18L1	0.548871	2.2e-19	2.99e-18	1
CDC45	1.68014	2.45e-19	3.31e-18	1
ZNF423	-1.14546	3.48e-19	4.6e-18	1
WDR48	-0.366808	3.9e-19	5.13e-18	1
CDKL2	-1.68821	4.07e-19	5.32e-18	1
KLK2	1.70929	4.53e-19	5.9e-18	1
ZSCAN22	0.463222	5.62e-19	7.24e-18	1
PLCB1	-0.857709	5.86e-19	7.5e-18	1
BCHE	-1.79716	6.06e-19	7.75e-18	1
ADD1	-0.360572	7.18e-19	9.1e-18	1
CEP55	1.7382	7.63e-19	9.63e-18	1
FAM217B	-0.660314	8.12e-19	1.02e-17	1
ITGA3	-1.02768	8.13e-19	1.02e-17	1
KDELC2	-0.850298	8.47e-19	1.06e-17	1
TYK2	0.436811	8.84e-19	1.11e-17	1
RSAD1	0.498299	9.01e-19	1.12e-17	1
TMOD2	-0.830968	9.1e-19	1.14e-17	1
INPP5B	-0.533642	9.29e-19	1.16e-17	1
NLE1	0.671875	1.04e-18	1.28e-17	1
VILL	-1.35279	1.09e-18	1.35e-17	1
RASGRF2	-0.92611	1.28e-18	1.57e-17	1
ANAPC5	0.50619	1.28e-18	1.57e-17	1
HHAT	-0.975717	1.33e-18	1.62e-17	1
MLC1	-2.13615	1.37e-18	1.67e-17	1
MATR3	1.11918	1.44e-18	1.76e-17	1
FLNA	-1.78398	1.45e-18	1.77e-17	1
ABCD3	-0.571992	1.65e-18	1.99e-17	1
OTX1	2.72076	1.74e-18	2.09e-17	1
PCSK6	1.68722	1.84e-18	2.21e-17	1
EDIL3	-1.27051	1.91e-18	2.29e-17	1
SV2B	-1.91552	2.03e-18	2.43e-17	1
DSC3	-2.00746	2.45e-18	2.91e-17	1
RGL1	-0.966881	2.53e-18	2.99e-17	1
ZIC5	4.83894	2.62e-18	3.1e-17	1
FLNC	-2.16195	2.77e-18	3.26e-17	1
SLC16A7	-1.2538	2.81e-18	3.3e-17	1
PEX3	-0.435189	2.96e-18	3.46e-17	1
PPP2R3A	-0.634952	2.98e-18	3.49e-17	1
NEK7	-0.696191	3e-18	3.5e-17	1
CTNND2	1.53922	3.15e-18	3.67e-17	1
AGL	-0.659587	3.23e-18	3.76e-17	1
PRKD3	-0.704886	3.33e-18	3.88e-17	1
TNS4	-2.523	3.35e-18	3.89e-17	1
GPR75	-1.28717	3.48e-18	4.04e-17	1
GARS	0.54827	5.3e-18	6.02e-17	1
SMAD3	-0.621499	5.34e-18	6.06e-17	1
ANXA4	-0.567536	5.95e-18	6.72e-17	1
SKIDA1	-1.09744	6.89e-18	7.72e-17	1
HSD11B1	-1.44831	6.9e-18	7.72e-17	1
BTG3	-0.822153	7.83e-18	8.71e-17	1
CLN5	-0.534645	9.47e-18	1.05e-16	1
XPO6	0.750745	1.1e-17	1.21e-16	1
SLC22A17	-1.05126	1.26e-17	1.37e-16	1
RAB34	-1.18271	1.32e-17	1.44e-16	1
RAC3	1.32248	1.49e-17	1.61e-16	1
MASP1	-1.8662	1.75e-17	1.87e-16	1
ESPL1	1.4837	2.55e-17	2.69e-16	1
CNTN1	-1.55997	2.61e-17	2.74e-16	1
ZNF783	0.707181	2.66e-17	2.79e-16	1
KLHDC1	-0.676692	3.06e-17	3.19e-16	1
P2RX2	-1.78153	3.16e-17	3.29e-16	1
SPRY3	-1.15793	3.19e-17	3.32e-16	1
SLC44A4	0.870484	3.19e-17	3.32e-16	1
PIP5K1C	-0.525461	3.19e-17	3.32e-16	1
EFNA5	-1.28405	3.35e-17	3.48e-16	1
VIPAS39	-0.31774	3.43e-17	3.55e-16	1
RUSC1	0.645947	3.43e-17	3.55e-16	1
NME1	0.953124	3.48e-17	3.61e-16	1
SORCS2	-1.3121	3.7e-17	3.81e-16	1
ANXA2	-1.19175	3.69e-17	3.81e-16	1
LACC1	-0.762743	3.82e-17	3.93e-16	1
SLFN12	-1.24789	3.95e-17	4.05e-16	1
XG	-1.74241	4.3e-17	4.38e-16	1
ZEB1	-1.06101	4.71e-17	4.78e-16	1
POU5F1B	1.3563	4.94e-17	5e-16	1
2018-03-01	0.931161	4.95e-17	5.01e-16	1
BUB1	1.55854	6.16e-17	6.16e-16	1
ITPR1	-1.53451	6.42e-17	6.41e-16	1
EVA1C	-0.984303	6.69e-17	6.65e-16	1
PTBP1	0.352921	8.13e-17	8e-16	1
APLF	-0.892158	9.03e-17	8.86e-16	1
PCP4	-1.86577	9.18e-17	8.99e-16	1
KIF14	1.83222	9.28e-17	9.07e-16	1
RALGAPA2	1.06785	1.02e-16	9.92e-16	1
ZNF781	-0.902707	1.07e-16	1.04e-15	1
NCCRP1	-1.78827	1.09e-16	1.05e-15	1
LRMP	-1.15385	1.09e-16	1.06e-15	1
COX7A1	-1.34638	1.09e-16	1.06e-15	1
C1orf116	0.964987	1.3e-16	1.25e-15	1
ZFP36L1	-1.04158	1.67e-16	1.59e-15	1
OXSM	0.533559	1.98e-16	1.86e-15	1
VPS36	-0.600647	2.27e-16	2.13e-15	1
DPP8	-0.482705	2.43e-16	2.27e-15	1
DUSP18	-0.633151	2.64e-16	2.46e-15	1
TUBG2	-0.644221	2.88e-16	2.67e-15	1
PDCD5	0.640679	3.16e-16	2.91e-15	1
ACTN4	-0.51674	3.36e-16	3.08e-15	1
CCNL2	1.0158	3.41e-16	3.12e-15	1
ZNF282	0.388958	3.45e-16	3.15e-15	1
B4GALNT1	-1.15926	3.91e-16	3.56e-15	1
ISX	2.18788	4.39e-16	3.97e-15	1
SLITRK2	-1.9904	4.6e-16	4.15e-15	1
MYBBP1A	0.516229	4.64e-16	4.18e-15	1
SOX12	0.737422	4.98e-16	4.47e-15	1
CHD5	-1.2919	6.16e-16	5.48e-15	1
BMPER	-1.79707	6.37e-16	5.66e-15	1
IQGAP1	-0.669901	6.42e-16	5.7e-15	1
STAT5A	-0.646342	6.63e-16	5.88e-15	1
FTO	-0.585789	6.96e-16	6.16e-15	1
ENAH	-0.66555	7.64e-16	6.73e-15	1
RBMS2	-0.638963	7.75e-16	6.81e-15	1
ZNF721	0.471912	7.95e-16	6.98e-15	1
CCT2	0.463885	8.52e-16	7.44e-15	1
CACNA2D3	-1.13592	1.11e-15	9.6e-15	1
SEMA3D	-1.74031	1.26e-15	1.08e-14	1
UCK2	0.808411	1.33e-15	1.14e-14	1
TECPR2	-0.428975	1.55e-15	1.32e-14	1
NOP58	0.450213	1.6e-15	1.36e-14	1
FUT2	-1.4355	1.77e-15	1.49e-14	1
MAST4	-0.849203	2.04e-15	1.71e-14	1
SH3PXD2A	-0.917689	2.21e-15	1.85e-14	1
ZEB2	-1.10608	2.26e-15	1.89e-14	1
TRIM29	-2.45406	2.38e-15	1.98e-14	1
SPARCL1	-1.30115	2.55e-15	2.12e-14	1
MOCOS	-0.754435	3.02e-15	2.5e-14	1
SLC35F4	-1.27056	3.07e-15	2.53e-14	1
MLST8	0.619662	3.24e-15	2.67e-14	1
SH3RF1	1.09851	3.63e-15	2.97e-14	1
TRIM22	-1.11154	3.65e-15	2.98e-14	1
TSHZ2	-0.96244	3.67e-15	2.99e-14	1
FAM181B	-1.21911	4.46e-15	3.6e-14	1
AKAP7	-0.896197	4.7e-15	3.78e-14	1
TOP2A	1.76642	5.06e-15	4.06e-14	1
ALDOC	-0.747508	5.69e-15	4.54e-14	1
SLC5A8	-2.62789	5.92e-15	4.71e-14	1
ZNF300P1	-1.35407	6.17e-15	4.9e-14	1
ZMIZ2	0.428519	7.27e-15	5.75e-14	1
TIPARP	-1.01639	7.58e-15	5.98e-14	1
TIMM13	0.779611	8.29e-15	6.52e-14	1
DOPEY1	-0.678119	8.38e-15	6.59e-14	1
KIAA0368	0.40544	9.73e-15	7.57e-14	1
ILF3	0.281011	9.95e-15	7.73e-14	1
RNF149	0.378569	1.03e-14	7.96e-14	1
ITGB4	-1.358	1.09e-14	8.45e-14	1
SDAD1P1	-0.668111	1.14e-14	8.84e-14	1
NADK	0.358139	1.17e-14	9.01e-14	1
CHMP3	-0.36134	1.18e-14	9.07e-14	1
TTLL6	1.10747	1.3e-14	9.97e-14	1
ZMYND11	-0.462134	1.58e-14	1.2e-13	1
HNRNPF	0.460908	1.59e-14	1.21e-13	1
AOC3	-1.2416	1.66e-14	1.26e-13	1
ERBB3	0.724803	1.72e-14	1.3e-13	1
KRT14	-2.08849	1.8e-14	1.35e-13	1
VGF	2.36348	2.01e-14	1.51e-13	1
PTRHD1	0.838707	2.17e-14	1.62e-13	1
GPALPP1	-0.449371	2.2e-14	1.64e-13	1
EVL	0.58131	2.23e-14	1.66e-13	1
MACC1	-1.36419	2.3e-14	1.71e-13	1
SMAD6	-0.808941	2.32e-14	1.72e-13	1
LYST	-0.65331	2.34e-14	1.74e-13	1
CAMK2N2	1.55803	2.45e-14	1.81e-13	1
CCDC171	-0.591932	2.44e-14	1.81e-13	1
PRSS12	-1.36348	2.5e-14	1.85e-13	1
CRHBP	-1.41218	2.71e-14	1.99e-13	1
ECI2	0.712799	2.72e-14	2e-13	1
TM7SF3	-0.623317	2.99e-14	2.19e-13	1
NOL6	0.449357	3.02e-14	2.21e-13	1
TMEM243	-0.634116	3.09e-14	2.25e-13	1
ZNF707	0.560856	3.19e-14	2.33e-13	1
FMO4	-0.738002	3.21e-14	2.34e-13	1
ITGA1	-1.10983	3.51e-14	2.54e-13	1
KLK4	1.32733	3.66e-14	2.65e-13	1
PLAU	-0.924053	3.73e-14	2.7e-13	1
RAB3GAP1	-0.447386	3.73e-14	2.7e-13	1
BLM	0.903979	4.24e-14	3.05e-13	1
ABCG1	0.793478	4.62e-14	3.3e-13	1
EEF2	0.55095	5.4e-14	3.83e-13	1
ARHGEF10L	-0.495124	7.02e-14	4.93e-13	1
SYT7	0.975564	7.16e-14	5.02e-13	1
KDSR	-0.437903	7.29e-14	5.11e-13	1
NELL2	-1.45579	7.6e-14	5.31e-13	1
CHD1L	0.462371	7.94e-14	5.53e-13	1
LIG3	0.578192	8.81e-14	6.1e-13	1
SHC2	1.00211	9.08e-14	6.28e-13	1
TBC1D19	-0.385392	9.69e-14	6.69e-13	1
TBCD	0.432627	1.01e-13	6.99e-13	1
BMPR1A	-0.496054	1.09e-13	7.48e-13	1
RPS6KA5	-0.606732	1.09e-13	7.49e-13	1
DYRK1B	0.545498	1.11e-13	7.59e-13	1
STK35	0.467577	1.18e-13	8.03e-13	1
BEST1	-0.671197	1.22e-13	8.29e-13	1
CPQ	-0.721135	1.23e-13	8.36e-13	1
KLHL30	-1.42747	1.51e-13	1.02e-12	1
KRT18	0.775147	1.67e-13	1.12e-12	1
CSPG4	-1.11995	1.79e-13	1.2e-12	1
APBA2	1.25054	1.89e-13	1.26e-12	1
CCDC180	1.25532	2e-13	1.33e-12	1
ARHGAP39	0.670079	1.99e-13	1.33e-12	1
PIK3C3	-0.366387	2.04e-13	1.36e-12	1
ABCA3	0.653214	2.42e-13	1.59e-12	1
ARPC5L	0.524006	2.52e-13	1.65e-12	1
PYGL	-1.10162	2.64e-13	1.72e-12	1
KLHL15	-0.612951	2.76e-13	1.8e-12	1
UHRF1	1.31117	3.06e-13	1.98e-12	1
CABP4	1.12476	3.16e-13	2.05e-12	1
SNX12	-0.254018	3.45e-13	2.23e-12	1
XK	-1.34001	3.53e-13	2.28e-12	1
FSCN2	0.992328	3.59e-13	2.32e-12	1
DOCK1	-0.62339	3.7e-13	2.38e-12	1
MSN	-0.919512	3.76e-13	2.41e-12	1
THBS3	0.633642	3.77e-13	2.42e-12	1
FCER1A	-1.26892	3.79e-13	2.44e-12	1
IVNS1ABP	-0.505469	3.82e-13	2.45e-12	1
CDK5RAP3	0.656093	3.86e-13	2.47e-12	1
MBNL3	-0.933941	3.87e-13	2.48e-12	1
IER5	-0.886246	4.02e-13	2.57e-12	1
STK32C	0.785388	4.09e-13	2.61e-12	1
GLUL	-0.637737	4.35e-13	2.76e-12	1
HYPK	0.789262	4.39e-13	2.78e-12	1
TCF21	-1.11181	4.38e-13	2.78e-12	1
KLK3	1.42326	4.43e-13	2.81e-12	1
SLC35C2	0.406829	4.78e-13	3.02e-12	1
PTPRZ1	-1.82941	4.85e-13	3.06e-12	1
IL1RL1	-1.52993	4.99e-13	3.14e-12	1
NOA1	0.473814	5.18e-13	3.26e-12	1
FOXB2	3.37595	5.23e-13	3.29e-12	1
AP4E1	-0.441654	5.68e-13	3.56e-12	1
MAP3K11	0.446544	5.89e-13	3.68e-12	1
SLC26A3	-2.43875	6.21e-13	3.87e-12	1
NID1	-1.0763	6.31e-13	3.92e-12	1
MOV10L1	1.94429	6.34e-13	3.94e-12	1
EXT1	-0.465177	6.65e-13	4.12e-12	1
SYT11	-0.953677	6.83e-13	4.23e-12	1
PPP2R5A	-0.374925	8.18e-13	5.03e-12	1
LSR	0.551719	8.3e-13	5.11e-12	1
NID2	-1.09803	8.97e-13	5.5e-12	1
TLR5	-0.659657	9.43e-13	5.77e-12	1
FANCF	0.486541	9.5e-13	5.82e-12	1
PPM1G	0.410251	9.56e-13	5.85e-12	1
CASP1	-0.885193	1e-12	6.11e-12	1
CENPE	1.03432	1.07e-12	6.49e-12	1
FAM71E1	0.836996	1.14e-12	6.9e-12	1
TRMT1	0.629707	1.14e-12	6.9e-12	1
TMEM143	-0.423872	1.15e-12	6.94e-12	1
PRR16	2.18277	1.19e-12	7.16e-12	1
EIF2S3	0.394327	1.21e-12	7.28e-12	1
HSPA12A	-0.771791	1.28e-12	7.72e-12	1
DDX24	-0.331967	1.31e-12	7.88e-12	1
PPP3CA	0.827948	1.36e-12	8.16e-12	1
PRKAR1A	-0.444727	1.47e-12	8.79e-12	1
PIEZO2	-0.994331	1.48e-12	8.82e-12	1
B3GNT3	-1.86424	1.51e-12	8.98e-12	1
NTRK1	-1.17767	1.71e-12	1.01e-11	1
C10orf76	-0.285341	1.76e-12	1.04e-11	1
PPP6R2	0.440136	1.79e-12	1.06e-11	1
FANCD2	0.590946	1.82e-12	1.07e-11	1
BEND3	1.00893	2.06e-12	1.21e-11	1
ADCY3	-0.702862	2.24e-12	1.31e-11	1
KIFC3	-0.781209	2.26e-12	1.32e-11	1
UVSSA	0.721876	2.35e-12	1.37e-11	1
E4F1	0.55105	2.36e-12	1.37e-11	1
WDR75	0.331201	2.39e-12	1.39e-11	1
GZF1	-0.301615	2.42e-12	1.41e-11	1
CCDC57	0.684151	2.47e-12	1.43e-11	1
SPTBN1	-0.732794	2.49e-12	1.44e-11	1
EPB41L2	-0.861736	2.51e-12	1.45e-11	1
PHF14	0.419673	2.55e-12	1.47e-11	1
TSTA3	0.752575	2.74e-12	1.58e-11	1
MAP3K7	-0.389112	2.86e-12	1.65e-11	1
CCDC7	0.6813	2.94e-12	1.69e-11	1
HOXB3	-1.15227	3.01e-12	1.73e-11	1
POU2F2	-0.802234	3.18e-12	1.82e-11	1
NEDD4	-0.725423	3.35e-12	1.92e-11	1
PAK1	-0.703396	3.48e-12	1.98e-11	1
TIMELESS	0.508155	3.51e-12	2e-11	1
MYLK4	-0.646736	3.54e-12	2.02e-11	1
L1CAM	-1.52958	3.57e-12	2.03e-11	1
POLD3	-0.297781	3.65e-12	2.07e-11	1
MPRIP	-0.417606	3.85e-12	2.18e-11	1
SLITRK3	-1.99484	3.91e-12	2.21e-11	1
DCHS1	-1.01763	3.97e-12	2.25e-11	1
MMP11	1.30951	4.02e-12	2.27e-11	1
EGFLAM	-0.876264	4.07e-12	2.29e-11	1
VANGL2	-1.21737	4.06e-12	2.29e-11	1
SLC27A3	-0.627469	4.22e-12	2.38e-11	1
IGF2BP2	-1.14565	4.28e-12	2.41e-11	1
GGA1	0.384465	4.37e-12	2.46e-11	1
CCNE2	0.847771	4.55e-12	2.55e-11	1
DHPS	0.481882	4.7e-12	2.63e-11	1
SP140L	-0.853223	4.83e-12	2.7e-11	1
CD81	-0.581114	5.03e-12	2.8e-11	1
ADCY6	0.539503	5.05e-12	2.81e-11	1
ADAMTS8	-0.944064	5.34e-12	2.97e-11	1
NLRP1	-0.860519	5.85e-12	3.24e-11	1
DGKQ	0.57239	5.91e-12	3.27e-11	1
MAPKAPK5	0.296121	6.13e-12	3.38e-11	1
FAM122A	-0.340493	6.36e-12	3.5e-11	1
ADAMTS9	-0.892518	6.96e-12	3.81e-11	1
IFIT5	-0.616274	7.05e-12	3.86e-11	1
AFAP1L1	-0.721987	7.24e-12	3.96e-11	1
BPHL	0.606545	7.49e-12	4.08e-11	1
TRMT2A	0.550286	8.18e-12	4.45e-11	1
PKP2	-0.587907	8.51e-12	4.62e-11	1
ZNF285	0.515894	8.66e-12	4.7e-11	1
CD82	-0.68144	9.24e-12	4.99e-11	1
XPC	-0.375934	9.55e-12	5.15e-11	1
ALCAM	0.701438	9.7e-12	5.23e-11	1
MCM10	1.33518	9.94e-12	5.35e-11	1
PREX2	-0.883285	1e-11	5.4e-11	1
FAM102B	-0.591543	1.02e-11	5.5e-11	1
HNRNPL	0.268336	1.07e-11	5.75e-11	1
PIBF1	-0.435601	1.09e-11	5.86e-11	1
MYOT	-1.70763	1.13e-11	6.01e-11	1
ITGAX	1.04715	1.2e-11	6.39e-11	1
CCDC115	-0.351472	1.23e-11	6.52e-11	1
MRPL15	0.548135	1.25e-11	6.61e-11	1
MIOS	0.486114	1.26e-11	6.66e-11	1
NAA60	0.562754	1.49e-11	7.81e-11	1
ANAPC2	0.418857	1.5e-11	7.87e-11	1
LZTS3	-0.674961	1.74e-11	9.05e-11	1
KPNA5	-0.537434	1.82e-11	9.41e-11	1
TTC7A	-0.409411	1.81e-11	9.41e-11	1
PGM1	-0.534529	1.96e-11	1.01e-10	1
SMAD9	-0.716152	2.03e-11	1.04e-10	1
DPY19L2P2	-0.936181	2.08e-11	1.07e-10	1
CHFR	0.353183	2.08e-11	1.07e-10	1
CROT	-0.60948	2.07e-11	1.07e-10	1
2018-09-02	-0.315713	2.29e-11	1.18e-10	1
NFE2L1	-0.378529	2.46e-11	1.26e-10	1
MMP10	2.21043	2.66e-11	1.35e-10	1
BMP4	-0.927504	2.67e-11	1.36e-10	1
KIF6	-1.03384	2.74e-11	1.39e-10	1
WWC2	-0.726195	2.78e-11	1.41e-10	1
PLXNB3	0.880737	2.8e-11	1.42e-10	1
NLRP12	1.96081	2.83e-11	1.43e-10	1
CDC14B	-0.707635	2.83e-11	1.43e-10	1
NSDHL	-0.413867	2.89e-11	1.46e-10	1
SGSH	0.433579	2.96e-11	1.49e-10	1
BTN2A3P	-0.708731	3e-11	1.51e-10	1
SIX2	-1.26805	3.08e-11	1.55e-10	1
ZWINT	0.939622	3.14e-11	1.58e-10	1
TMEM145	1.5357	3.3e-11	1.65e-10	1
GYPC	-0.835583	3.34e-11	1.67e-10	1
FADS2	-1.74067	3.36e-11	1.68e-10	1
TSGA10	0.703761	3.67e-11	1.83e-10	1
ARHGEF2	-0.587807	3.91e-11	1.94e-10	1
POLN	0.840301	3.93e-11	1.95e-10	1
TCF4	-0.664293	4.06e-11	2.01e-10	1
ISCU	-0.398264	4.11e-11	2.03e-10	1
XPO7	-0.393866	4.27e-11	2.11e-10	1
SUSD4	-0.847241	4.37e-11	2.15e-10	1
ZDHHC11	1.37245	4.72e-11	2.32e-10	1
EHBP1L1	-0.71917	4.82e-11	2.36e-10	1
MMP16	-1.11314	4.94e-11	2.42e-10	1
RAB24	0.760938	5.16e-11	2.52e-10	1
COL4A4	-0.970275	5.3e-11	2.58e-10	1
PABPC4	0.437521	5.33e-11	2.6e-10	1
SGSM3	0.574423	5.55e-11	2.7e-10	1
SORCS1	-1.3471	5.78e-11	2.8e-10	1
HAUS4	-0.392613	6.21e-11	2.99e-10	1
OPA1	-0.385099	6.2e-11	2.99e-10	1
SLC19A2	0.66797	6.46e-11	3.1e-10	1
MRTO4	0.452877	6.47e-11	3.11e-10	1
INTS5	0.363427	6.51e-11	3.13e-10	1
SLC22A3	-1.51876	6.62e-11	3.17e-10	1
DDX56	0.417828	6.72e-11	3.22e-10	1
SLC6A16	-0.86514	7.69e-11	3.67e-10	1
RHOT1	-0.30976	7.86e-11	3.75e-10	1
SYNPO	-0.888533	8.42e-11	4e-10	1
DPP3	0.446894	8.46e-11	4.01e-10	1
TECPR1	0.708596	8.78e-11	4.15e-10	1
PAXIP1	0.426836	8.81e-11	4.17e-10	1
TAF6L	0.413512	9.42e-11	4.44e-10	1
MCM7	0.469448	9.54e-11	4.49e-10	1
KNDC1	-1.14898	9.68e-11	4.56e-10	1
PCDHGB7	-1.09361	9.73e-11	4.57e-10	1
CCDC110	0.878616	9.93e-11	4.66e-10	1
SLFN5	-0.766392	9.94e-11	4.67e-10	1
ADAM19	-0.885455	1.04e-10	4.86e-10	1
SLCO2A1	-0.866384	1.05e-10	4.89e-10	1
FGFR1OP2	-0.354511	1.07e-10	5.01e-10	1
ATG12	-0.288108	1.12e-10	5.22e-10	1
TTC22	-1.11979	1.13e-10	5.26e-10	1
FZD3	-0.648225	1.15e-10	5.35e-10	1
CYB561A3	0.757789	1.19e-10	5.54e-10	1
MCAT	0.536313	1.22e-10	5.66e-10	1
AXL	-0.793475	1.25e-10	5.77e-10	1
NPDC1	0.713046	1.28e-10	5.92e-10	1
PLEKHM1	-0.37043	1.3e-10	6e-10	1
TRAIP	0.575572	1.32e-10	6.08e-10	1
PSD4	0.454752	1.38e-10	6.36e-10	1
NBPF8	0.892978	1.41e-10	6.46e-10	1
COG6	-0.50414	1.47e-10	6.74e-10	1
ZNF7	0.39801	1.57e-10	7.2e-10	1
CYFIP2	0.56586	1.58e-10	7.23e-10	1
KLHL36	-0.468424	1.61e-10	7.36e-10	1
ZNF76	0.280103	1.62e-10	7.41e-10	1
UTP3	0.305827	1.63e-10	7.45e-10	1
CACNA2D1	-1.09499	1.68e-10	7.64e-10	1
MEGF10	-1.07022	1.68e-10	7.66e-10	1
SLC6A6	-0.730156	1.76e-10	7.99e-10	1
ADRB2	0.857986	1.78e-10	8.09e-10	1
ANTXR2	-0.853754	1.83e-10	8.29e-10	1
OLFML3	-0.941843	1.83e-10	8.29e-10	1
ACSS2	-0.35476	1.86e-10	8.42e-10	1
LAMA4	-0.856299	1.88e-10	8.5e-10	1
FER1L5	-0.980502	1.9e-10	8.6e-10	1
B3GALT4	-0.594818	1.93e-10	8.74e-10	1
CES2	-0.366617	1.95e-10	8.83e-10	1
MEF2C	-0.833517	2.06e-10	9.28e-10	1
EEF1E1	0.524319	2.08e-10	9.37e-10	1
ANKRD13B	0.865571	2.1e-10	9.44e-10	1
RRAGA	-0.291549	2.14e-10	9.62e-10	1
KPNA4	-0.320833	2.15e-10	9.67e-10	1
AP5Z1	0.433938	2.17e-10	9.73e-10	1
NR4A3	-1.57554	2.19e-10	9.83e-10	1
C1orf43	0.343409	2.19e-10	9.85e-10	1
HIST1H2AD	1.34088	2.28e-10	1.02e-09	1
KIAA1217	-0.510899	2.3e-10	1.03e-09	1
RNF220	0.268868	2.31e-10	1.03e-09	1
DDX39B	0.661613	2.32e-10	1.04e-09	1
DNAJC2	0.338092	2.34e-10	1.05e-09	1
GRHL2	0.526501	2.56e-10	1.14e-09	1
KCNT2	-1.28123	2.73e-10	1.21e-09	1
AJAP1	-1.16705	2.76e-10	1.22e-09	1
DNAJB11	0.385652	2.75e-10	1.22e-09	1
RNF144A	0.662465	2.79e-10	1.24e-09	1
TUBGCP3	-0.293526	2.85e-10	1.26e-09	1
BACH2	-0.828297	2.91e-10	1.29e-09	1
PYCARD	-0.843164	2.97e-10	1.31e-09	1
SMYD2	0.606813	3.01e-10	1.33e-09	1
GTF3C1	0.451477	3.06e-10	1.35e-09	1
RSBN1	-0.363276	3.12e-10	1.37e-09	1
TDP2	-0.465671	3.15e-10	1.39e-09	1
PSMG3	0.648669	3.18e-10	1.4e-09	1
ASB1	-0.376684	3.21e-10	1.41e-09	1
GIGYF1	0.429002	3.22e-10	1.42e-09	1
ADAM28	-0.891792	3.35e-10	1.47e-09	1
GNPNAT1	0.622793	3.5e-10	1.53e-09	1
PDCD11	0.385205	3.57e-10	1.56e-09	1
C7	-1.43568	3.6e-10	1.57e-09	1
TRPV6	0.848652	3.61e-10	1.58e-09	1
ARHGAP11A	0.8066	4.02e-10	1.75e-09	1
NAALADL2	0.986777	4.07e-10	1.77e-09	1
DCN	-1.18851	4.21e-10	1.82e-09	1
ENGASE	0.584301	4.35e-10	1.88e-09	1
SSH1	-0.44178	4.4e-10	1.9e-09	1
EARS2	0.361369	4.41e-10	1.91e-09	1
MSH5-SAPCD1	1.08374	4.55e-10	1.97e-09	1
GNA13	-0.457625	4.69e-10	2.03e-09	1
GRIN1	0.888924	4.83e-10	2.08e-09	1
CDH22	-1.56852	4.9e-10	2.11e-09	1
MED4	-0.376139	4.9e-10	2.11e-09	1
GBP2	-0.889725	4.93e-10	2.12e-09	1
PIP5KL1	-0.863817	5.17e-10	2.22e-09	1
PPFIBP2	-0.628048	5.2e-10	2.23e-09	1
LRRC43	-0.872131	5.41e-10	2.32e-09	1
ITGA6	-0.578345	5.56e-10	2.38e-09	1
RBM6	0.559563	5.57e-10	2.38e-09	1
XPO5	0.318437	5.64e-10	2.41e-09	1
CAMK2D	-0.559177	5.91e-10	2.52e-09	1
CNPY2	0.50567	6.01e-10	2.56e-09	1
S100A4	-0.98428	6.05e-10	2.57e-09	1
TBC1D2B	-0.452654	6.12e-10	2.6e-09	1
GFPT2	-0.787435	6.31e-10	2.67e-09	1
NMNAT1	-0.259589	6.57e-10	2.78e-09	1
PLCH2	-0.906132	6.7e-10	2.83e-09	1
ABCC3	-1.06228	6.86e-10	2.89e-09	1
IRGQ	0.362265	6.94e-10	2.92e-09	1
MID1	-0.787246	7.01e-10	2.95e-09	1
EVX1	-1.10683	7.17e-10	3.01e-09	1
PDE3B	0.956296	7.25e-10	3.04e-09	1
TNKS	-0.473679	7.53e-10	3.16e-09	1
AGPAT4	-0.712961	7.68e-10	3.21e-09	1
ZNF292	-0.626089	8.28e-10	3.46e-09	1
ADAMTS15	-0.830728	8.5e-10	3.54e-09	1
KRT86	-1.06875	8.73e-10	3.63e-09	1
USP53	-0.564682	9.37e-10	3.88e-09	1
SLC9B2	-0.773009	9.59e-10	3.96e-09	1
MAN2B1	0.429422	9.69e-10	4.01e-09	1
SPDL1	0.461957	9.84e-10	4.07e-09	1
EXOSC5	0.601055	9.85e-10	4.07e-09	1
KCNN3	-0.889629	9.96e-10	4.11e-09	1
MRPS25	0.409867	1.01e-09	4.18e-09	1
TTC38	0.536997	1.03e-09	4.25e-09	1
PER1	-0.945426	1.07e-09	4.42e-09	1
CRK	-0.305965	1.09e-09	4.47e-09	1
SERINC1	-0.529539	1.1e-09	4.54e-09	1
TFDP2	-0.32512	1.11e-09	4.57e-09	1
C3orf62	0.394967	1.18e-09	4.82e-09	1
GAL3ST3	-1.25974	1.21e-09	4.93e-09	1
TTC13	0.390799	1.23e-09	5.01e-09	1
MCF2L	0.500095	1.24e-09	5.06e-09	1
ACLY	0.591752	1.27e-09	5.19e-09	1
VPS11	-0.269367	1.28e-09	5.21e-09	1
SNX33	-0.31996	1.29e-09	5.27e-09	1
SYPL1	-0.343627	1.31e-09	5.31e-09	1
GRID1	-0.882249	1.39e-09	5.63e-09	1
THSD7B	-1.25368	1.44e-09	5.83e-09	1
STK24	-0.498575	1.5e-09	6.04e-09	1
TBX5	-1.56624	1.53e-09	6.16e-09	1
PRG4	1.15996	1.6e-09	6.45e-09	1
FHIT	0.752339	1.61e-09	6.48e-09	1
CDC6	0.838942	1.61e-09	6.49e-09	1
DOCK4	0.723965	1.64e-09	6.59e-09	1
SHE	-0.680019	1.66e-09	6.68e-09	1
AQP4	-0.988605	1.71e-09	6.85e-09	1
CD207	-1.16053	1.71e-09	6.87e-09	1
ASAP1	-0.573053	1.73e-09	6.94e-09	1
ETV6	-0.425024	1.73e-09	6.94e-09	1
HIST2H2AC	0.880509	1.77e-09	7.1e-09	1
FHOD1	0.478351	1.79e-09	7.15e-09	1
DECR1	0.500787	1.8e-09	7.19e-09	1
CSDE1	-0.282161	1.81e-09	7.24e-09	1
BAIAP2L2	1.67765	1.86e-09	7.43e-09	1
SNX18	-0.399464	1.89e-09	7.52e-09	1
C6orf89	-0.236613	1.99e-09	7.91e-09	1
PRDM2	-0.382888	2.05e-09	8.12e-09	1
TRPV4	-0.974178	2.06e-09	8.18e-09	1
AMIGO2	-0.833433	2.17e-09	8.6e-09	1
SERGEF	0.642571	2.49e-09	9.8e-09	1
PCYOX1L	0.41215	2.64e-09	1.04e-08	1
SIRT7	0.427038	2.69e-09	1.06e-08	1
SLC37A4	-0.48674	2.73e-09	1.07e-08	1
TANK	-0.305889	2.83e-09	1.11e-08	1
TDRD1	3.50289	2.87e-09	1.12e-08	1
TBC1D5	-0.372047	2.95e-09	1.15e-08	1
MTHFR	0.537106	3.04e-09	1.19e-08	1
CYP7B1	-0.738611	3.07e-09	1.2e-08	1
XPOT	0.427108	3.11e-09	1.21e-08	1
ZNF395	-0.380956	3.13e-09	1.22e-08	1
LZTR1	0.325177	3.16e-09	1.23e-08	1
PTN	-1.33725	3.29e-09	1.28e-08	1
AVL9	0.450448	3.48e-09	1.35e-08	1
NAAA	0.639953	3.51e-09	1.36e-08	1
ATP8A1	0.65578	3.93e-09	1.51e-08	1
MED26	0.27635	4.05e-09	1.56e-08	1
RB1	-0.50249	4.27e-09	1.64e-08	1
TLDC1	-0.291248	4.33e-09	1.66e-08	1
CDH2	-1.29494	4.38e-09	1.68e-08	1
MTHFD1L	0.742223	4.77e-09	1.82e-08	1
FBN2	-1.08689	4.84e-09	1.84e-08	1
CYP27B1	0.83808	4.9e-09	1.87e-08	1
CSTF3	0.275723	5.16e-09	1.96e-08	1
APRT	0.701128	5.35e-09	2.03e-08	1
ZNF652	0.514454	5.55e-09	2.1e-08	1
CDH19	-1.61046	5.68e-09	2.15e-08	1
HMGCS1	-0.654812	5.79e-09	2.18e-08	1
SLC22A10	2.09134	5.87e-09	2.21e-08	1
ARAP3	-0.607044	5.9e-09	2.23e-08	1
TPSG1	-0.985162	6.08e-09	2.29e-08	1
NEBL	-0.637832	6.09e-09	2.29e-08	1
HIST1H2BE	1.29321	6.13e-09	2.31e-08	1
SEPHS2	0.361188	6.5e-09	2.44e-08	1
IGFBP6	-1.06358	6.53e-09	2.45e-08	1
ITGA8	-1.224	6.72e-09	2.52e-08	1
HNRNPD	0.245413	6.89e-09	2.58e-08	1
DNA2	0.664556	6.95e-09	2.6e-08	1
GPATCH4	0.381795	6.94e-09	2.6e-08	1
ZNF212	0.263066	7.13e-09	2.67e-08	1
LRRC8B	0.562259	7.91e-09	2.94e-08	1
LUC7L	0.626183	8e-09	2.97e-08	1
CYP2W1	-1.38447	8.23e-09	3.05e-08	1
ARC	-1.24092	8.4e-09	3.11e-08	1
TMTC3	-0.44879	8.71e-09	3.22e-08	1
MAP6	-0.516184	8.98e-09	3.31e-08	1
SHC4	-0.732215	9.02e-09	3.32e-08	1
KCTD8	-1.37936	1.01e-08	3.7e-08	1
HEY2	1.04133	1.02e-08	3.73e-08	1
GAD1	1.15287	1.12e-08	4.08e-08	1
CDK5	0.465561	1.14e-08	4.14e-08	1
B3GAT1	1.51802	1.2e-08	4.35e-08	1
ZNF587	0.427374	1.21e-08	4.4e-08	1
RAP1GAP2	0.774754	1.23e-08	4.47e-08	1
SRMS	1.47779	1.27e-08	4.61e-08	1
FAM174B	0.564106	1.29e-08	4.66e-08	1
ACTR5	0.305137	1.35e-08	4.85e-08	1
ATP2C1	0.531799	1.36e-08	4.9e-08	1
PSAT1	0.758265	1.37e-08	4.92e-08	1
SEC61A1	0.389618	1.39e-08	4.99e-08	1
ENOPH1	0.35373	1.39e-08	4.99e-08	1
QKI	-0.523324	1.39e-08	4.99e-08	1
XPNPEP3	0.286182	1.39e-08	5e-08	1
STS	-0.49425	1.44e-08	5.15e-08	1
MYO16	-0.960492	1.46e-08	5.22e-08	1
ZNF579	0.615575	1.47e-08	5.27e-08	1
BTBD7	-0.359218	1.48e-08	5.3e-08	1
LYSMD4	-0.388728	1.49e-08	5.31e-08	1
SGSM1	-0.679507	1.49e-08	5.31e-08	1
RPL7	0.519608	1.55e-08	5.53e-08	1
CPEB4	-0.571232	1.62e-08	5.76e-08	1
RECQL	-0.609666	1.63e-08	5.81e-08	1
HIST1H2AE	1.3205	1.65e-08	5.87e-08	1
SSTR1	1.75739	1.65e-08	5.88e-08	1
WDR13	0.475693	1.69e-08	5.99e-08	1
S100A8	-1.18884	1.73e-08	6.14e-08	1
KLK1	-1.25055	1.73e-08	6.14e-08	1
AOC2	0.761878	1.81e-08	6.39e-08	1
PRKACA	-0.270473	1.82e-08	6.43e-08	1
MKRN1	0.250679	1.88e-08	6.64e-08	1
INTS1	0.379294	1.88e-08	6.64e-08	1
TYW3	-0.269962	1.94e-08	6.82e-08	1
GLI4	0.624065	2.09e-08	7.33e-08	1
CCNG2	0.593968	2.33e-08	8.14e-08	1
AKAP12	-0.88189	2.33e-08	8.14e-08	1
ACVR1C	-0.701227	2.39e-08	8.35e-08	1
ZNF606	0.347562	2.48e-08	8.64e-08	1
GALNT3	0.764674	2.52e-08	8.77e-08	1
FIBP	0.397687	2.62e-08	9.1e-08	1
TNFRSF18	1.1058	2.63e-08	9.14e-08	1
ZKSCAN7	-0.575584	2.64e-08	9.15e-08	1
HIPK4	-0.631611	2.65e-08	9.2e-08	1
POLR1A	0.378559	2.66e-08	9.24e-08	1
FAM155A	-1.10062	2.68e-08	9.3e-08	1
DIMT1	-0.287526	2.69e-08	9.32e-08	1
APOL1	-0.819769	2.71e-08	9.37e-08	1
MYO6	0.885755	2.71e-08	9.38e-08	1
TTC21A	0.545195	2.86e-08	9.86e-08	1
ACP1	0.251343	3.13e-08	1.08e-07	1
KNSTRN	0.507928	3.2e-08	1.1e-07	1
GART	0.321001	3.26e-08	1.12e-07	1
KIF17	-0.651785	3.45e-08	1.18e-07	1
HEATR3	0.376446	3.5e-08	1.2e-07	1
NAB2	-0.503857	3.55e-08	1.21e-07	1
AADAT	0.832858	3.83e-08	1.3e-07	1
ZSCAN25	-0.278514	4.06e-08	1.38e-07	1
SIGLEC1	1.04122	4.3e-08	1.45e-07	1
EPN1	0.412967	4.47e-08	1.51e-07	1
PLOD3	0.369256	4.5e-08	1.52e-07	1
AAMP	0.28949	4.56e-08	1.54e-07	1
SYNE3	-0.668488	4.63e-08	1.56e-07	1
TMEM136	0.535933	4.65e-08	1.56e-07	1
EPHB3	0.652965	4.74e-08	1.59e-07	1
DNASE2B	1.75727	4.77e-08	1.6e-07	1
SLC25A38	0.302909	5.13e-08	1.72e-07	1
GHRHR	1.76563	5.19e-08	1.73e-07	1
ZBTB17	0.333067	5.19e-08	1.74e-07	1
CACNB2	-0.502548	5.29e-08	1.77e-07	1
NVL	0.498025	5.3e-08	1.77e-07	1
SV2C	0.962552	5.41e-08	1.8e-07	1
MPHOSPH10	0.283069	5.46e-08	1.82e-07	1
ZCCHC4	-0.249044	5.48e-08	1.83e-07	1
SLC39A14	-0.445224	5.52e-08	1.84e-07	1
ZWILCH	0.407563	5.8e-08	1.93e-07	1
TFCP2L1	-1.15102	5.9e-08	1.96e-07	1
SCAF1	0.329315	5.99e-08	1.99e-07	1
NLN	0.513837	6.01e-08	2e-07	1
DDX41	0.297051	6.13e-08	2.03e-07	1
HIST1H2BF	1.62202	6.53e-08	2.16e-07	1
CFL1	0.326233	6.56e-08	2.17e-07	1
CALCOCO1	-0.296933	6.73e-08	2.22e-07	1
CATSPERG	0.439278	6.98e-08	2.3e-07	1
MAGED1	0.460985	7.02e-08	2.31e-07	1
CDKN2AIPNL	0.422948	7.39e-08	2.42e-07	1
PLEKHA5	-0.395589	7.42e-08	2.43e-07	1
KRT19	-1.23243	7.59e-08	2.48e-07	1
ZNF215	-0.972278	7.72e-08	2.52e-07	1
RPL11	0.523844	7.91e-08	2.58e-07	1
RASSF9	-0.855822	7.97e-08	2.6e-07	1
TBX1	1.64215	7.97e-08	2.6e-07	1
HNRNPA1	0.30576	8.12e-08	2.64e-07	1
DAPK1	0.776851	8.1e-08	2.64e-07	1
TBL1XR1	0.435097	8.72e-08	2.83e-07	1
UBR1	-0.435601	8.9e-08	2.88e-07	1
EBF2	1.61927	8.98e-08	2.91e-07	1
PPEF1	1.01949	9.3e-08	3.01e-07	1
CSF3	-1.99771	9.78e-08	3.15e-07	1
PRX	-0.416039	1.04e-07	3.33e-07	1
GALNT10	0.475372	1.14e-07	3.65e-07	1
ZNF782	0.409682	1.15e-07	3.66e-07	1
C19orf24	0.645284	1.16e-07	3.69e-07	1
RBMX	0.213108	1.17e-07	3.74e-07	1
ABHD2	0.823734	1.18e-07	3.77e-07	1
SP100	-0.488946	1.19e-07	3.78e-07	1
MRC2	-0.680238	1.19e-07	3.78e-07	1
TCF12	-0.438031	1.19e-07	3.78e-07	1
GPR155	-0.526842	1.19e-07	3.8e-07	1
UBAP2	0.32407	1.21e-07	3.86e-07	1
MMP24	-0.592227	1.23e-07	3.89e-07	1
EPHA7	-0.85509	1.25e-07	3.95e-07	1
ZNF276	0.508917	1.29e-07	4.1e-07	1
MMRN1	-1.03465	1.35e-07	4.26e-07	1
CYP2D6	0.820249	1.38e-07	4.37e-07	1
EPN2	-0.2698	1.46e-07	4.58e-07	1
GIPC3	-0.701212	1.53e-07	4.8e-07	1
NPEPL1	0.674624	1.54e-07	4.83e-07	1
HSPA9	0.282083	1.55e-07	4.86e-07	1
RSPO1	-0.962607	1.55e-07	4.88e-07	1
NELL1	-1.11633	1.59e-07	4.99e-07	1
PPIG	-0.295938	1.65e-07	5.16e-07	1
EIF5	-0.286776	1.71e-07	5.35e-07	1
ADAM23	-0.810259	1.77e-07	5.51e-07	1
DUSP4	-0.978491	1.81e-07	5.65e-07	1
ADAMTS2	0.942227	1.87e-07	5.81e-07	1
INSIG1	-0.710924	1.87e-07	5.82e-07	1
SMC5	-0.338953	1.94e-07	6e-07	1
TTC31	0.220512	1.95e-07	6.05e-07	1
IFI30	0.924887	1.96e-07	6.09e-07	1
TIAM1	-0.60835	2e-07	6.18e-07	1
RTF1	-0.237486	2e-07	6.18e-07	1
GOLGA2	0.328226	2.05e-07	6.34e-07	1
MTMR6	-0.339054	2.07e-07	6.39e-07	1
KCNAB3	0.851988	2.12e-07	6.51e-07	1
CRYBG3	-0.923199	2.12e-07	6.53e-07	1
STK11IP	0.314512	2.14e-07	6.58e-07	1
LYAR	0.357732	2.15e-07	6.61e-07	1
ACVR2A	-0.339331	2.24e-07	6.87e-07	1
TLL1	-0.789637	2.25e-07	6.9e-07	1
PAGR1	0.388835	2.25e-07	6.9e-07	1
VSIG10	0.297917	2.29e-07	7e-07	1
KIF2A	-0.478809	2.35e-07	7.2e-07	1
SDC1	-0.893843	2.5e-07	7.6e-07	1
PTGFRN	-0.369964	2.52e-07	7.67e-07	1
ZNF143	-0.214127	2.63e-07	7.99e-07	1
ARHGAP5	-0.426915	2.64e-07	8.01e-07	1
UAP1L1	0.494311	2.72e-07	8.25e-07	1
VCP	0.273514	2.74e-07	8.28e-07	1
MICAL3	-0.578655	2.88e-07	8.69e-07	1
INHA	0.982779	2.91e-07	8.79e-07	1
HDLBP	0.297462	3.02e-07	9.11e-07	1
FCGRT	-0.511505	3.3e-07	9.88e-07	1
BMP6	1.0585	3.36e-07	1e-06	1
ABCC8	-1.02323	3.4e-07	1.02e-06	1
DPP6	-1.43094	3.44e-07	1.03e-06	1
ADGRG1	-0.497926	3.5e-07	1.04e-06	1
NIM1K	-0.472956	3.5e-07	1.05e-06	1
GLT8D2	-0.604343	3.61e-07	1.08e-06	1
ZNF668	0.326994	3.66e-07	1.09e-06	1
HSPB1	-0.934162	3.67e-07	1.09e-06	1
DIO3	-0.800159	3.7e-07	1.1e-06	1
RPP38	0.266227	3.69e-07	1.1e-06	1
JMJD4	0.382192	3.72e-07	1.11e-06	1
SIN3B	-0.266422	3.74e-07	1.11e-06	1
WDR77	0.312532	3.8e-07	1.13e-06	1
SLC25A46	-0.312832	3.8e-07	1.13e-06	1
AP3B2	-0.681794	3.91e-07	1.16e-06	1
TNC	-0.86922	3.93e-07	1.16e-06	1
FAHD2A	0.314228	4.01e-07	1.19e-06	1
PXDN	0.614906	4.04e-07	1.2e-06	1
MAP3K9	0.496181	4.21e-07	1.24e-06	1
TRIM38	-0.538183	4.27e-07	1.26e-06	1
DMAP1	0.381483	4.35e-07	1.28e-06	1
TNFAIP3	-0.718284	4.34e-07	1.28e-06	1
PARP9	0.506761	4.37e-07	1.29e-06	1
ZNF593	0.668233	4.51e-07	1.32e-06	1
TBC1D7	0.387949	4.52e-07	1.33e-06	1
USP9X	-0.367411	4.55e-07	1.34e-06	1
NPTX1	-0.952903	4.74e-07	1.39e-06	1
PPP2R1B	0.313221	4.75e-07	1.39e-06	1
PLA2G2A	1.76481	4.73e-07	1.39e-06	1
MECR	0.285457	4.97e-07	1.46e-06	1
NXPE4	-1.76615	5.05e-07	1.48e-06	1
CRISP2	-1.60414	5.09e-07	1.49e-06	1
ERLEC1	-0.375873	5.09e-07	1.49e-06	1
SCN3A	-0.835282	5.15e-07	1.5e-06	1
NTM	1.2028	5.28e-07	1.54e-06	1
PPIL4	-0.25289	5.41e-07	1.58e-06	1
DEK	-0.30338	5.72e-07	1.66e-06	1
DTL	0.780705	6e-07	1.74e-06	1
C15orf56	-0.868108	6.16e-07	1.78e-06	1
NUMA1	0.330913	6.14e-07	1.78e-06	1
KIAA0319	-0.994363	6.24e-07	1.8e-06	1
PODN	-0.803621	6.22e-07	1.8e-06	1
HK2	0.725515	6.26e-07	1.81e-06	1
SLC25A23	-0.31333	6.45e-07	1.86e-06	1
EDF1	0.547064	6.53e-07	1.88e-06	1
FRY	-0.550821	6.52e-07	1.88e-06	1
HSPA1L	-0.328484	6.56e-07	1.89e-06	1
FAM120B	-0.253123	6.66e-07	1.92e-06	1
SGCD	-0.886446	6.75e-07	1.94e-06	1
PI4K2A	-0.263431	6.94e-07	1.99e-06	1
DUSP1	-0.857085	7e-07	2.01e-06	1
DDX27	0.201938	7.06e-07	2.02e-06	1
SCAP	0.272594	7.16e-07	2.05e-06	1
SELE	-1.41145	7.28e-07	2.08e-06	1
UGT2B4	2.81438	7.45e-07	2.13e-06	1
CYP4F2	-1.99908	7.48e-07	2.13e-06	1
GAN	-0.40007	7.56e-07	2.16e-06	1
FKBP4	0.422239	7.62e-07	2.17e-06	1
TSC22D4	0.33638	7.94e-07	2.26e-06	1
SCYL1	0.28222	7.98e-07	2.27e-06	1
WDR46	0.295017	8.17e-07	2.32e-06	1
DONSON	0.355985	8.38e-07	2.38e-06	1
CSAD	0.648457	8.41e-07	2.38e-06	1
NDC80	-0.544108	8.94e-07	2.53e-06	1
F5	1.75354	8.96e-07	2.53e-06	1
CROCC	0.453598	9.06e-07	2.56e-06	1
API5	-0.243776	9.08e-07	2.57e-06	1
SBNO1	-0.309771	9.13e-07	2.58e-06	1
MFAP5	-1.20111	9.47e-07	2.66e-06	1
SERPING1	-0.730463	1.01e-06	2.84e-06	1
ZNF365	-0.720761	1.02e-06	2.85e-06	1
SORL1	-0.679261	1.02e-06	2.85e-06	1
EHMT2	0.240138	1.03e-06	2.87e-06	1
ZFYVE26	-0.290413	1.08e-06	3.03e-06	1
TICRR	0.636602	1.16e-06	3.24e-06	1
TWF1	-0.390058	1.2e-06	3.35e-06	1
MBTPS1	-0.267519	1.25e-06	3.45e-06	1
DKK1	-1.21996	1.27e-06	3.51e-06	1
TMEM45A	-0.66078	1.28e-06	3.55e-06	1
GALNT15	-0.76763	1.32e-06	3.65e-06	1
NT5C3A	0.32578	1.32e-06	3.66e-06	1
RAB5C	-0.242181	1.35e-06	3.73e-06	1
SPTAN1	-0.262863	1.38e-06	3.82e-06	1
NXN	-0.349053	1.39e-06	3.83e-06	1
DLG5	-0.647074	1.39e-06	3.84e-06	1
KLHDC9	0.448992	1.42e-06	3.91e-06	1
TUBGCP6	0.350111	1.44e-06	3.96e-06	1
CACNA2D4	-0.508517	1.45e-06	3.98e-06	1
NDUFA10	0.258684	1.48e-06	4.05e-06	1
NUP160	-0.341566	1.49e-06	4.09e-06	1
SLC9A5	0.652526	1.57e-06	4.3e-06	1
ZNF286A	-0.291282	1.59e-06	4.35e-06	1
BAZ1A	0.358014	1.6e-06	4.37e-06	1
EBF4	-0.576206	1.63e-06	4.44e-06	1
CACNB1	-0.566645	1.68e-06	4.58e-06	1
MYLK3	-0.880157	1.71e-06	4.67e-06	1
ZC3H6	-0.308954	1.72e-06	4.68e-06	1
MARS	0.24065	1.72e-06	4.68e-06	1
TTC39B	-0.37567	1.73e-06	4.71e-06	1
SLC7A5	-0.796796	1.82e-06	4.95e-06	1
ATXN1	-0.504043	1.83e-06	4.96e-06	1
MT-CO2	0.621682	1.87e-06	5.07e-06	1
CHRDL2	-1.02805	1.88e-06	5.11e-06	1
EVI5	-0.291648	1.88e-06	5.11e-06	1
PSMA1	0.2325	1.91e-06	5.17e-06	1
BACE1	-0.346127	1.92e-06	5.2e-06	1
ZNF83	0.411444	1.93e-06	5.24e-06	1
FAM126A	-0.457931	1.95e-06	5.27e-06	1
WDR31	-0.31607	2.02e-06	5.47e-06	1
C14orf79	0.391564	2.03e-06	5.48e-06	1
SLC27A5	0.585139	2.03e-06	5.49e-06	1
NWD1	0.596652	2.03e-06	5.49e-06	1
EEA1	-0.390318	2.18e-06	5.86e-06	1
SPATA20	0.393079	2.35e-06	6.29e-06	1
EIF2B1	0.189831	2.43e-06	6.51e-06	1
RIC3	-0.725937	2.45e-06	6.56e-06	1
CCDC148	-0.452795	2.47e-06	6.6e-06	1
UBALD2	0.43452	2.49e-06	6.66e-06	1
ZDBF2	-0.606545	2.49e-06	6.67e-06	1
UNC5A	2.17514	2.52e-06	6.74e-06	1
DYNC1LI2	-0.589338	2.52e-06	6.74e-06	1
ZFYVE1	-0.199841	2.57e-06	6.84e-06	1
KMT2E	-0.430517	2.69e-06	7.18e-06	1
LIMK1	0.266542	2.9e-06	7.69e-06	1
CDK19	0.802184	2.93e-06	7.79e-06	1
SEZ6L2	0.66898	2.97e-06	7.86e-06	1
ARHGAP31	-0.517932	2.98e-06	7.89e-06	1
OSR1	-0.688391	3.06e-06	8.1e-06	1
ARMC5	0.40945	3.06e-06	8.11e-06	1
ARHGAP11B	0.550086	3.14e-06	8.29e-06	1
DRP2	-0.739349	3.14e-06	8.3e-06	1
LARS	0.222246	3.15e-06	8.33e-06	1
MTA1	0.295011	3.15e-06	8.33e-06	1
BBS12	-0.382192	3.16e-06	8.35e-06	1
BMPR1B	0.632171	3.17e-06	8.38e-06	1
KBTBD3	-0.266798	3.18e-06	8.39e-06	1
NGLY1	0.234166	3.19e-06	8.43e-06	1
ORC3	-0.27749	3.31e-06	8.73e-06	1
IRF9	0.665879	3.34e-06	8.81e-06	1
ALDH1B1	-0.408554	3.38e-06	8.88e-06	1
TRANK1	-0.536915	3.39e-06	8.92e-06	1
GUCY1A2	-0.673571	3.48e-06	9.14e-06	1
SNX29	-0.320573	3.48e-06	9.14e-06	1
GPC6	-0.624295	3.48e-06	9.15e-06	1
HERPUD1	-0.509448	3.6e-06	9.44e-06	1
TAOK2	0.208513	3.64e-06	9.54e-06	1
NKTR	0.422672	3.69e-06	9.65e-06	1
FBXO16	-0.382864	4.05e-06	1.05e-05	1
RFK	0.34198	4.07e-06	1.06e-05	1
PACS1	0.280247	4.09e-06	1.06e-05	1
SCNN1B	-1.05634	4.12e-06	1.07e-05	1
ETFA	0.316502	4.11e-06	1.07e-05	1
ZC3H3	0.305973	4.22e-06	1.09e-05	1
RTKN	0.426734	4.21e-06	1.09e-05	1
FOXN1	-0.885354	4.34e-06	1.13e-05	1
SLC34A2	-1.62015	4.37e-06	1.13e-05	1
ZNF319	-0.264535	4.36e-06	1.13e-05	1
ATP9B	-0.249503	4.37e-06	1.13e-05	1
TAGAP	-0.737321	4.47e-06	1.16e-05	1
CMTR2	-0.373852	4.49e-06	1.16e-05	1
FAM227B	-0.270775	4.57e-06	1.18e-05	1
C2orf42	-0.15726	4.56e-06	1.18e-05	1
MCM3AP	0.265642	4.62e-06	1.19e-05	1
ANKRD34B	3.08748	4.67e-06	1.21e-05	1
ZNF841	0.410811	4.76e-06	1.23e-05	1
ARRDC3	-0.541913	4.88e-06	1.26e-05	1
TRIM68	0.572459	5.03e-06	1.29e-05	1
USP28	-0.325079	5.08e-06	1.3e-05	1
ATPAF2	0.282385	5.15e-06	1.32e-05	1
LAMA2	-0.694903	5.24e-06	1.34e-05	1
ENOX1	0.570485	5.31e-06	1.36e-05	1
C9orf139	0.6826	5.34e-06	1.37e-05	1
SLC22A4	-0.622515	5.58e-06	1.42e-05	1
DHX32	0.284862	5.59e-06	1.43e-05	1
HYAL1	-0.441774	5.67e-06	1.45e-05	1
BOLA3	0.360763	5.76e-06	1.47e-05	1
ESYT1	-0.248792	5.79e-06	1.47e-05	1
BBS4	0.573905	5.85e-06	1.49e-05	1
IFT27	0.310176	6.01e-06	1.53e-05	1
PLB1	-0.366407	6.22e-06	1.58e-05	1
SUPV3L1	0.214447	6.26e-06	1.59e-05	1
ESCO2	0.818004	6.4e-06	1.62e-05	1
TBCK	-0.272905	6.45e-06	1.63e-05	1
SFT2D1	0.284053	6.53e-06	1.65e-05	1
NBEAP1	2.39017	6.74e-06	1.7e-05	1
LILRB3	0.609344	6.75e-06	1.71e-05	1
MCOLN1	0.250791	6.98e-06	1.76e-05	1
IRX3	-0.546712	7.09e-06	1.79e-05	1
HSP90AB1	0.234432	7.38e-06	1.85e-05	1
PCDHGB6	-0.65561	7.58e-06	1.9e-05	1
TBC1D22B	0.291041	7.66e-06	1.92e-05	1
LRP2	-0.952659	7.84e-06	1.96e-05	1
ANKRD44	-0.402575	7.91e-06	1.98e-05	1
CEACAM1	-0.801446	8.12e-06	2.02e-05	1
GAL3ST1	-0.740128	8.27e-06	2.06e-05	1
SDCBP2	-0.641635	8.27e-06	2.06e-05	1
ACCS	0.582956	8.33e-06	2.07e-05	1
SLC16A3	-0.520609	8.3e-06	2.07e-05	1
VAPA	-0.197497	8.37e-06	2.08e-05	1
SOX13	-0.293486	8.48e-06	2.11e-05	1
CEACAM6	-1.20811	8.62e-06	2.14e-05	1
HAP1	-0.728929	8.88e-06	2.2e-05	1
ZIK1	-0.646477	8.95e-06	2.22e-05	1
DNAH11	-0.827961	9.28e-06	2.3e-05	1
MAP1S	0.279345	9.86e-06	2.43e-05	1
CPT1C	-0.531409	1.02e-05	2.52e-05	1
YEATS2	0.27785	1.02e-05	2.52e-05	1
CAPN12	-0.622677	1.03e-05	2.54e-05	1
DACH2	-1.38437	1.04e-05	2.55e-05	1
ZKSCAN1	0.344042	1.03e-05	2.55e-05	1
PRMT6	0.394393	1.04e-05	2.56e-05	1
CHERP	0.211962	1.04e-05	2.56e-05	1
HSPH1	-0.394437	1.05e-05	2.59e-05	1
UNC13B	0.448401	1.07e-05	2.62e-05	1
ARHGAP25	-0.505259	1.08e-05	2.64e-05	1
FBXO21	-0.261391	1.12e-05	2.75e-05	1
PMM1	0.433134	1.16e-05	2.84e-05	1
SH3D19	-0.35042	1.16e-05	2.84e-05	1
HS6ST1	-0.332382	1.17e-05	2.85e-05	1
STAG1	-0.463596	1.19e-05	2.9e-05	1
ANKRD12	-0.327378	1.2e-05	2.94e-05	1
NUMB	-0.202573	1.22e-05	2.97e-05	1
CAPZB	-0.241144	1.23e-05	2.99e-05	1
MFSD6	-0.430406	1.23e-05	3e-05	1
MAP7D2	-0.787989	1.27e-05	3.09e-05	1
ATP10A	0.648013	1.29e-05	3.14e-05	1
STRN3	-0.261761	1.29e-05	3.14e-05	1
RSPRY1	-0.233905	1.29e-05	3.14e-05	1
TEK	-0.534397	1.3e-05	3.16e-05	1
SHC1	-0.222228	1.3e-05	3.16e-05	1
SLC20A1	0.302162	1.32e-05	3.22e-05	1
LIMK2	-0.323415	1.33e-05	3.22e-05	1
GLUD2	-0.646215	1.41e-05	3.41e-05	1
FDFT1	-0.452041	1.41e-05	3.41e-05	1
ZNF287	-0.225181	1.42e-05	3.44e-05	1
COL4A3BP	-0.346263	1.44e-05	3.49e-05	1
CDYL	-0.225242	1.45e-05	3.51e-05	1
CACNA1B	-1.09131	1.46e-05	3.53e-05	1
ZSWIM3	0.293649	1.49e-05	3.59e-05	1
PCDHGB1	1.20326	1.53e-05	3.67e-05	1
ENC1	0.543218	1.54e-05	3.7e-05	1
GABRE	-0.912238	1.54e-05	3.71e-05	1
TSG101	0.176645	1.54e-05	3.71e-05	1
SLC16A13	-0.457415	1.55e-05	3.74e-05	1
SP4	-0.331828	1.55e-05	3.74e-05	1
DIO1	1.40851	1.62e-05	3.87e-05	1
MAPKAPK3	0.318138	1.61e-05	3.87e-05	1
ZNF347	-0.216491	1.64e-05	3.93e-05	1
TEAD2	-0.498501	1.68e-05	4.01e-05	1
RIOK1	0.198842	1.68e-05	4.02e-05	1
DCAF4	0.202613	1.71e-05	4.07e-05	1
COQ7	0.20508	1.71e-05	4.07e-05	1
LRRC7	1.09177	1.74e-05	4.14e-05	1
KIF5B	-0.295322	1.74e-05	4.14e-05	1
TMEM189	-0.295795	1.82e-05	4.32e-05	1
PNKD	0.422564	1.86e-05	4.41e-05	1
C6orf62	0.200777	1.86e-05	4.42e-05	1
ANKRD13A	-0.268359	1.89e-05	4.48e-05	1
SOBP	-0.552461	1.9e-05	4.5e-05	1
GTDC1	-0.295999	1.91e-05	4.52e-05	1
ASXL2	-0.388552	1.94e-05	4.58e-05	1
SH3GLB2	0.398761	1.95e-05	4.6e-05	1
SUMF2	-0.305107	1.97e-05	4.64e-05	1
APEH	0.286589	1.99e-05	4.68e-05	1
MYO7B	-0.598609	1.99e-05	4.69e-05	1
ZNF689	-0.193174	1.99e-05	4.69e-05	1
NCOA5	0.163662	2e-05	4.71e-05	1
LTBP1	-0.609299	2.02e-05	4.74e-05	1
SEMA3F	-0.488933	2.04e-05	4.79e-05	1
TRAPPC8	-0.334178	2.05e-05	4.82e-05	1
LRRK1	-0.443237	2.1e-05	4.92e-05	1
RWDD2A	0.389489	2.11e-05	4.95e-05	1
COL14A1	-0.762124	2.11e-05	4.95e-05	1
NSMAF	0.282978	2.16e-05	5.07e-05	1
C9orf85	0.228172	2.18e-05	5.11e-05	1
CXCL1	-1.16397	2.2e-05	5.14e-05	1
GRM2	0.611637	2.26e-05	5.28e-05	1
ZNF341	0.208038	2.29e-05	5.35e-05	1
HLTF	0.345638	2.29e-05	5.35e-05	1
NDEL1	-0.233551	2.31e-05	5.39e-05	1
MID2	-0.368501	2.33e-05	5.42e-05	1
ZNF93	0.32657	2.37e-05	5.52e-05	1
WDR3	0.324531	2.38e-05	5.54e-05	1
HIVEP2	-0.355566	2.42e-05	5.61e-05	1
PCDHGA10	-0.949083	2.43e-05	5.64e-05	1
LINC00173	0.950001	2.45e-05	5.69e-05	1
PPP1CA	0.282062	2.48e-05	5.75e-05	1
KMT2B	0.237092	2.49e-05	5.78e-05	1
GNB1L	0.397724	2.5e-05	5.79e-05	1
PIK3R5	0.569476	2.52e-05	5.84e-05	1
EPDR1	-0.460562	2.54e-05	5.88e-05	1
HNRNPA0	0.196362	2.61e-05	6.03e-05	1
GBP3	-0.823036	2.62e-05	6.06e-05	1
SLC38A2	-0.293696	2.64e-05	6.08e-05	1
PPARG	-0.708611	2.67e-05	6.16e-05	1
BMI1	-0.243547	2.73e-05	6.3e-05	1
METTL18	0.257369	2.78e-05	6.4e-05	1
NBEAL1	-0.471003	2.78e-05	6.4e-05	1
SPECC1	0.446697	2.78e-05	6.4e-05	1
PNRC1	-0.303542	2.79e-05	6.41e-05	1
CA8	-0.938433	2.79e-05	6.42e-05	1
KCNC4	-0.529393	2.82e-05	6.49e-05	1
AP4B1	0.215838	2.84e-05	6.53e-05	1
LYSMD3	-0.378614	2.97e-05	6.8e-05	1
DAGLA	-0.459727	3.01e-05	6.89e-05	1
POLG	0.201654	3.01e-05	6.89e-05	1
ATRX	-0.354673	3.03e-05	6.92e-05	1
HDAC9	-0.791879	3.04e-05	6.94e-05	1
ZNF777	0.185561	3.13e-05	7.15e-05	1
TAF6	-0.23872	3.13e-05	7.15e-05	1
TUBB4A	1.6143	3.26e-05	7.43e-05	1
ZNF551	-0.327369	3.27e-05	7.43e-05	1
R3HCC1L	-0.228993	3.27e-05	7.44e-05	1
ARFGEF2	-0.392893	3.31e-05	7.53e-05	1
ELMO3	0.461332	3.32e-05	7.56e-05	1
FBN3	-0.8207	3.33e-05	7.58e-05	1
POLR1B	0.302743	3.35e-05	7.62e-05	1
SLC8B1	0.27097	3.36e-05	7.64e-05	1
ABCA8	-0.658019	3.44e-05	7.82e-05	1
RANBP6	-0.226815	3.47e-05	7.88e-05	1
MTCH2	0.241401	3.48e-05	7.9e-05	1
PIK3R2	0.523201	3.5e-05	7.94e-05	1
HIPK2	0.496733	3.5e-05	7.94e-05	1
SNX19	-0.229881	3.51e-05	7.96e-05	1
DDX17	0.240769	3.54e-05	8.03e-05	1
KLK14	1.34881	3.55e-05	8.05e-05	1
DNM1L	-0.204151	3.55e-05	8.05e-05	1
BMPR2	-0.359031	3.62e-05	8.2e-05	1
ZNF839	0.232543	3.68e-05	8.33e-05	1
CDC27	-0.212067	3.7e-05	8.36e-05	1
CIRBP	0.297834	3.77e-05	8.52e-05	1
SPINK5	-0.950752	3.81e-05	8.6e-05	1
SLC11A1	0.479531	3.88e-05	8.74e-05	1
SF3A3	-0.138336	4.01e-05	9.03e-05	1
PIK3AP1	0.520831	4.06e-05	9.12e-05	1
ZNF404	0.340383	4.07e-05	9.14e-05	1
ALDH1L1	-0.840247	4.12e-05	9.26e-05	1
PRKAB1	-0.196367	4.13e-05	9.28e-05	1
PCDHB8	1.53824	4.43e-05	9.92e-05	1
HTATSF1	-0.165006	4.44e-05	9.93e-05	1
RBL1	-0.287154	4.54e-05	0.000101431	1
GOLGA2P5	0.509955	4.56e-05	0.00010196	1
METTL23	0.205733	4.75e-05	0.000105875	1
LINC00969	0.52438	4.75e-05	0.000105924	1
NUPR1	0.569315	4.82e-05	0.000107298	1
ZNF181	0.233666	4.83e-05	0.000107486	1
ZNF512	-0.409394	4.91e-05	0.000109185	1
METTL14	-0.186784	4.98e-05	0.00011064	1
FBXO6	0.297146	4.99e-05	0.000110851	1
CNKSR3	0.416711	5.03e-05	0.000111716	1
SERINC3	-0.170194	5.06e-05	0.000112197	1
FBN1	-0.617607	5.15e-05	0.000114106	1
CHRD	0.740823	5.15e-05	0.000114135	1
PCNT	0.248423	5.15e-05	0.0001142	1
ASCC3	-0.37337	5.2e-05	0.000115247	1
RCL1	0.233707	5.25e-05	0.000116207	1
DHX40	-0.191003	5.5e-05	0.000121516	1
INPP5E	0.25738	5.6e-05	0.000123621	1
INTS6	-0.301512	5.69e-05	0.000125426	1
UNC5D	-1.4439	5.75e-05	0.000126755	1
NOTCH4	-0.409307	5.81e-05	0.000127859	1
PACS2	0.213777	5.95e-05	0.00013094	1
TPM4	-0.312665	6.01e-05	0.00013203	1
ALYREF	0.279221	6.02e-05	0.000132177	1
PSMC6	0.162365	6.05e-05	0.000132833	1
MIS12	-0.2129	6.11e-05	0.000134126	1
HAPLN1	-1.32166	6.25e-05	0.000137156	1
CLCN5	0.36369	6.4e-05	0.00014033	1
FMO1	-0.619529	6.45e-05	0.000141224	1
PPP2R5E	-0.189365	6.48e-05	0.000141909	1
ALG14	0.284912	6.65e-05	0.00014543	1
TMEM192	0.278008	6.78e-05	0.000148115	1
CDC37	0.25323	6.81e-05	0.000148683	1
MDC1	-0.22232	7.01e-05	0.000152803	1
STOX1	-0.536695	7.09e-05	0.000154499	1
NFIL3	-0.488621	7.12e-05	0.000155075	1
TDRD6	0.924014	7.2e-05	0.000156755	1
KIF5C	0.462834	7.26e-05	0.000157885	1
JADE1	-0.385857	7.3e-05	0.000158688	1
GBP4	-0.567464	7.35e-05	0.000159609	1
PPRC1	0.265977	7.52e-05	0.000163132	1
VGLL3	-1.29379	7.72e-05	0.000167067	1
ATG14	-0.165602	7.97e-05	0.000172078	1
STK4	-0.264874	8.11e-05	0.000174807	1
NR2F1	-0.547742	8.11e-05	0.000174842	1
GBA2	0.226543	8.17e-05	0.00017594	1
MUC6	-1.95542	8.28e-05	0.000178167	1
WSB1	0.364738	8.45e-05	0.000181573	1
EFHC1	0.326102	8.73e-05	0.000187293	1
MRPS9	0.227904	8.93e-05	0.00019132	1
NIPBL	-0.261773	9.1e-05	0.000194734	1
SLX4	0.235946	9.25e-05	0.000197791	1
UBA7	-0.4831	9.26e-05	0.000198044	1
IKZF2	-0.4031	9.51e-05	0.000203239	1
MEOX2	-0.828365	9.56e-05	0.000204213	1
IRAK2	-0.415767	9.67e-05	0.000206348	1
CCL14	-0.745363	9.87e-05	0.000210271	1
CETP	0.647722	9.93e-05	0.000211437	1
ZNF585B	-0.1719	9.96e-05	0.000212024	1
MIPOL1	0.297209	9.99e-05	0.000212647	1
PCDHB16	0.986953	0.000102462	0.000217857	1
ZNF549	0.205655	0.00010428	0.000221594	1
POMGNT1	0.246507	0.000105646	0.000224393	1
RFC3	0.410568	0.000105915	0.000224914	1
[truncated: 615 more rows]
