# Supplementary material for: Interactions between Germline and Somatic Mutated Genes in Aggressive Prostate Cancer
Source: Prostate Cancer. 2019 Mar 17;2019:4047680. doi: 10.1155/2019/4047680 (PMC6441536; doi:10.1155/2019/4047680)
Supplement: Supplementary Materials — Table S1B: list of significantly differentially expressed nonsomatic mutated genes associated with aggressive PCa along with estimates of P values, adjusted P values, and log fold change. Table SA: a comprehensive list of single nucleotide polymorphisms (herein called genetic variants). Table S1A: list of significantly differentially expressed somatic mutated genes associated with aggressive PCa. [file 4047680.f1.zip › TARUN-HICKS_PROJECT2-PCA-Table SA-SUBMITTED.xlsx]

## Sheet: PROSTATE_SNP_GENES
Supplementary Table SA. A comprehensive list of single nucleotide polymorphisms (herein called genetic variants) and associated genes associated with increased risk of developing prostate cancer, and published GWAS reports denoted by the PubMed ID and actual reference from which the data was extracted.
Gene symbol	SNP_ID	REGION	GWAS P-Value	Data source	PUBMEDID	FIRST AUTHOR	DATE	JOURNAL
2018-03-08	rs76934034	10q11.22	1e-08	GWASTABLE	25217961	Al Olama AA	2014-09-14	Nat Genet
ABLIM1	rs10885582	10q25.3	4e-06	GWASTABLE	22219177	Tao S	2012-01-04	Carcinogenesis
ACOXL	rs3789080	2q13	4e-06	GWASTABLE	22219177	Tao S	2012-01-04	Carcinogenesis
ACTBL2	rs10940579	5q11.2	4e-06	GWASTABLE	22219177	Tao S	2012-01-04	Carcinogenesis
ACTC1	rs543686	15q14	4e-06	GWASTABLE	22219177	Tao S	2012-01-04	Carcinogenesis
ADAM15	rs1218582	1q21.3	2e-08	GWASTABLE	23535732	Eeles RA	2013-04-01	Nat Genet
ADAMTS12	rs2548035	q35	5.11x10-5	literature	19117981	Sun J, Zheng SL, Wiklund F, Isaacs SD, Li G, Wiley KE. Et al. Sequence variants at 22q13 are associated with prostate cancer risk. Cancer Res. 2009 Jan 1;69(1):10-5.
ADCY5	rs11708067	3q21.1	0.03	literature	23193118	Machiela MJ, Lindstr≈m S, Allen NE, Haiman CA, Albanes D, Barricarte A, et al. Association of type 2 diabetes susceptibility variants with advanced prostate cancer risk in the Breast and Prostate Cancer Cohort Consortium. Am J Epidemiol. 2012 Dec 15;176(12):1121-9.
ADNP	rs12480328	20q13.13	5e-11	GWASTABLE	25217961	Al Olama AA	2014-09-14	Nat Genet
AKR1C3	rs4881400	10p15-p14	0.03	literature	22542949	Kwon EM, Holt SK, Fu R, Kolb S, Williams G, Stanford JL, Ostrander EA. Androgen metabolism and JAK/STAT pathway genes and prostate cancer risk. Cancer Epidemiol. 2012 Aug;36(4):347-53.
AMIGO2	rs2711721	12q13.11 x 22q13.2	2e-06	GWASTABLE	22219177	Tao S	2012-01-04	Carcinogenesis
ANK2	rs7694725	4q25 x 8q24.21	2e-06	GWASTABLE	22219177	Tao S	2012-01-04	Carcinogenesis
ANP32D	rs4489787	12q13.11 x 17q12	1e-06	GWASTABLE	22219177	Tao S	2012-01-04	Carcinogenesis
ANXA13	rs13258681	8q24.13 x 11p15.5	4e-06	GWASTABLE	22219177	Tao S	2012-01-04	Carcinogenesis
AR	rs5919432	Xq12	1e-08	GWASTABLE	21743467	Kote-Jarai Z	2011-07-10	Nat Genet
ARL15	rs792017	5p15.2	5.4x10-19	literature	18264097	Eeles RA, Kote-Jarai Z, Giles GG, Olama AA, Guy M, Jugurnauth SK, Mulholland S, Leongamornlert DA, et al. Multiple newly identified loci associated with prostate cancer susceptibility. Nat Genet. 2008 Mar;40(3):316-21.
ARMC4	rs2492906	10p12.1	1e-08	GWASTABLE	28139693	Hoffmann TJ	2017-01-31	Nat Commun
ATF7IP	rs3213764	12p13.1	2e-09	GWASTABLE	23359319	Jin G	2013-01-01	Neoplasia
ATP5SL	rs11672691	19q13.2	1e-08	GWASTABLE	23065704	Amin Al Olama A	2012-10-12	Hum Mol Genet
BAI3	rs9351730	6q12 x 6q25.3	5e-06	GWASTABLE	22219177	Tao S	2012-01-04	Carcinogenesis
BAIAP2L1	rs9649213	7q21.3 x 10q26.13	1e-06	GWASTABLE	22219177	Tao S	2012-01-04	Carcinogenesis
BCL11A	rs2556375	2p16.1	6e-19	GWASTABLE	28139693	Hoffmann TJ	2017-01-31	Nat Commun
BIK	rs5759167	22q13.31	3.01x10-3	literature	19767753	Eeles RA, Kote-Jarai Z, Al Olama AA, Giles GG, Guy M, Severi G, Muir K. et al. Identification of seven new prostate cancer susceptibility loci through a genome-wide association study. Nat Genet. 2009 Oct;41(10):1116-21.
BIK	rs5759167	22q13.31	1.30x10-12	literature	21390317	Lindstrom S, Schumacher F, Siddiq A, Travis RC, Campa D, et al. Characterizing associations and SNP-environment interactions for GWAS-identified prostate cancer risk markers--results from BPC3. PLoS One. 2011 Feb 24;6(2):e17142.
BIK	rs5759167	22q13.31	9.39x10-7	literature	22459122	Tsilidis KK, Travis RC, Appleby PN, Allen NE, Lindstrom S, Schumacher FR, et al. Interactions between genome-wide significant genetic variants and circulating concentrations of insulin-like growth factor 1, sex hormones, and binding proteins in relation to prostate cancer risk in the National Cancer Institute Breast and Prostate Cancer Cohort Consortium. Am J Epidemiol. 2012 May 1;175(9):926-35.
BIK	rs5759167	22q13.2	1e-16	GWASTABLE	25939597	Berndt SI	2015-05-05	Nat Commun
BIK	rs742134	22q13.31	6e-06	nggri	22923026	Cheng I, Chen GK, Nakagawa H, Evaluating genetic risk for prostate cancer among Japanese and Latinos. 2012 Nov;21(11):2048-58
BIK	rs742134	22q13.31	5.6x10-9	literature	21743057	Schumacher FR, Berndt SI, Siddiq A, Jacobs KB. Et al. Genome-wide association study identifies new prostate cancer susceptibility loci. Hum Mol Genet. 2011 Oct 1;20(19):3867-75.
BMP5	rs3734444	6p12.1	<0.04	literature	22844442	Huang SP, Bao BY, Hour TC, Huang CY, Yu CC, Liu CC, Lee YC, Huang CN, Pao JB, Huang CH. Genetic variants in CASP3, BMP5, and IRS2 genes may influence survival in prostate cancer patients receiving androgen-deprivation therapy. PLoS One. 2012;7(7):e41219.
BMPR1A	rs11597689	10q22.3	0.03	literature	22844442	Huang SP, Bao BY, Hour TC, Huang CY, Yu CC, Liu CC, Lee YC, Huang CN, Pao JB, Huang CH. Genetic variants in CASP3, BMP5, and IRS2 genes may influence survival in prostate cancer patients receiving androgen-deprivation therapy. PLoS One. 2012;7(7):e41219.
BOD1	rs6869841	5q35.2	5e-08	GWAS Database	23535732	Eeles RA1, Olama AA, Benlloch S, Saunders EJ et al. Identification of 23 new prostate cancer susceptibility loci using the iCOGS custom genotyping array. Nat Genet. 2013 Apr;45(4):385-91, 391e1-2. doi: 10.1038/ng.2560.
BOK	rs3771570	2q37.3	5e-09	GWASTABLE	23535732	Eeles RA	2013-04-01	Nat Genet
BRCA1	rs1799950	17q21.31	0.01	literature	18073375	Duggan D, Zheng SL, Knowlton M, Benitez D, Dimitrov L, Wiklund F, Robbins C. et al. Two genome-wide association studies of aggressive prostate cancer implicate putative prostate tumor suppressor gene DAB2IP. J Natl Cancer Inst. 2007 Dec 19;99(24):1836-44.
C14ORF118	rs3813546	14q24.3	7.42x10-4	literature	21960693	Feng J, Sun J, Kim ST, Lu Y, Wang Z, Zhang Z, Gronberg H, Isaacs WB, Zheng SL, Xu J. A genome-wide survey over the ChIP-on-chip identified androgen receptor-binding genomic regions identifies a novel prostate cancer susceptibility locus at 12q13.13. Cancer Epidemiol Biomarkers Prev. 2011 Nov;20(11):2396-403.
C16orf78	rs8057939	16q12.1	5e-06	GWASTABLE	22219177	Tao S	2012-01-04	Carcinogenesis
C18orf34	rs6507016	18q12.1	4e-06	GWASTABLE	22219177	Tao S	2012-01-04	Carcinogenesis
C2ORF43	rs13385191	2p24.1	7.5x10-8	literature	22132073	Batra J, Lose F, O'Mara T, Marquart L, Stephens C, Alexander K, Srinivasan S, Eeles RA, Easton DF, Al Olama AA, Kote-Jarai Z, Guy M, Muir K, Lophatananon A, Rahman AA, Neal DE, Hamdy FC, Donovan JL, Chambers S, Gardiner RA, Aitken J, Yaxley J, Kedda MA, Clements JA, Spurdle AB. Association between Prostinogen (KLK15) genetic variants and prostate cancer risk and aggressiveness in Australia and a …
C2orf43	rs13385191	2p24.1	8e-08	nggri	22923026	Cheng I, Chen GK, Nakagawa H, Evaluating genetic risk for prostate cancer among Japanese and Latinos. 2012 Nov;21(11):2048-58
C2ORF43	rs13385191	2p24.1	0.01	literature	22056502	Lindstr≈m S, Schumacher FR, Campa D, Albanes D, Andriole G, Berndt SI, et al. Replication of five prostate cancer loci identified in an Asian population--results from the NCI Breast and Prostate Cancer Cohort Consortium (BPC3). Cancer Epidemiol Biomarkers Prev. 2012 Jan;21(1):212-6.
C2ORF43	rs13385191	2p24.1	0.01	literature	22056501	Lindstr≈m S, Schumacher FR, Campa D, Albanes D, Andriole G. Replication of five prostate cancer loci identified in an Asian population--results from the NCI Breast and Prostate Cancer Cohort Consortium (BPC3). Cancer Epidemiol Biomarkers Prev. 2012 Jan;21(1):212-6.
C2orf43	rs13385191	2p24.1	0.01	literature	21390317	Lindstrom S, Schumacher F, Siddiq A, Travis RC, Campa D, et al. Characterizing associations and SNP-environment interactions for GWAS-identified prostate cancer risk markers--results from BPC3. PLoS One. 2011 Feb 24;6(2):e17142.
C2ORF43	rs13385191	2p24.1	8.60x10-5	literature	22662242	Long QZ, Du YF, Ding XY, Li X, Song WB, Yang Y, Zhang P, Zhou JP, Liu XG. Replication and fine mapping for association of the C2orf43, FOXP4, GPRC6A and RFX6 genes with prostate cancer in the Chinese population. PLoS One. 2012;7(5):e37866.
C2orf43	rs13385191	2p24.1	7.5x10-8	literature	20676098	Takata R, Akamatsu S, Kubo M, Takahashi A et al. Genome-wide association study identifies five new susceptibility loci for prostate cancer in the Japanese population. Nat Genet. 2010 Sep;42(9):751-4.
C2orf43	rs13385191	2p24.1	5e-06	GWASTABLE	26443449	Wang M	2015-10-07	Nat Commun
C2ORF43	rs340623	2p24.1	3.8x10-3	literature	21637779	Haiman CA, Chen GK, Blot WJ, Strom SS, Berndt SI, Kittles RA. Et al. Characterizing genetic risk at known prostate cancer susceptibility loci in African Americans. PLoS Genet. 2011 May;7(5):e1001387.
C2orf48	rs11902236	2p25.1	3e-08	GWASTABLE	23535732	Eeles RA	2013-04-01	Nat Genet
C7orf66	rs10277209	7q31.1	4e-06	GWASTABLE	22219177	Tao S	2012-01-04	Carcinogenesis
C9orf123	rs12682851	9p24.1	2e-06	GWASTABLE	22219177	Tao S	2012-01-04	Carcinogenesis
C9orf3	rs3802458	9q22	4e-06	erdisfanct/nggri	20932654	Kerns SL, Ostrer H, Stock R, Genome-wide association study to identify single nucleotide polymorphisms (SNPs) associated with the development of erectile dysfunction in African-American men after radiotherapy for prostate cancer. 2010 Dec 1;78(5):1292-300.
C9ORF46	rs1535453	9p24.1	6.84x10-5	literature	19117981	Sun J, Zheng SL, Wiklund F, Isaacs SD, Li G, Wiley KE. Et al. Sequence variants at 22q13 are associated with prostate cancer risk. Cancer Res. 2009 Jan 1;69(1):10-5.
CASC19	rs138042437	8q24.21	2e-08	GWASTABLE	27262462	Teerlink CC	2016-06-04	Hum Genet
CASC8	rs4506170	8q24.21	2e-09	GWASTABLE	27262462	Teerlink CC	2016-06-04	Hum Genet
CASP3	rs4862396	4q34	0.04	literature	22844442	Huang SP, Bao BY, Hour TC, Huang CY, Yu CC, Liu CC, Lee YC, Huang CN, Pao JB, Huang CH. Genetic variants in CASP3, BMP5, and IRS2 genes may influence survival in prostate cancer patients receiving androgen-deprivation therapy. PLoS One. 2012;7(7):e41219.
CCDC88C	rs17127296	14q32.12	9.00x10-5	literature	19117981	Sun J, Zheng SL, Wiklund F, Isaacs SD, Li G, Wiley KE. Et al. Sequence variants at 22q13 are associated with prostate cancer risk. Cancer Res. 2009 Jan 1;69(1):10-5.
CCHCR1	rs130067	6p21.3	3.2x10-8	literature	18708398	Kote-Jarai Z, Easton DF, Stanford JL, Ostrander EA, Schleutker J, Ingles SA, et al. Multiple novel prostate cancer predisposition loci confirmed by an international study: the PRACTICAL Consortium. Cancer Epidemiol Biomarkers Prev. 2008 Aug;17(8):2052-61.
CCHCR1	rs130067	6p21.33	3e-08	GWASTABLE	21743467	Kote-Jarai Z	2011-07-10	Nat Genet
CD180	rs7717572	5q13.1 x 3p12.1	3e-06	GWASTABLE	22219177	Tao S	2012-01-04	Carcinogenesis
CD200R1L	rs1002979	3q13.2 x 2q31.1	3e-06	GWASTABLE	22219177	Tao S	2012-01-04	Carcinogenesis
CDH13	rs11861609	16q23.3	0.0007	literature	19767753	Eeles RA, Kote-Jarai Z, Al Olama AA, Giles GG, Guy M, Severi G, Muir K, Identification of seven new prostate cancer susceptibility loci through a genome-wide association study. Nat Genet. 2009 Oct;41(10):1116-21.
CDH13	rs4782780	16q23.3	1.1x10-6	literature	19767753	Eeles RA, Kote-Jarai Z, Al Olama AA, Giles GG, Guy M, Severi G, Muir K, Identification of seven new prostate cancer susceptibility loci through a genome-wide association study. Nat Genet. 2009 Oct;41(10):1116-21.
CDKAL1	rs12198220	6p22.3	2e-07	GWASTABLE	25939597	Berndt SI	2015-05-05	Nat Commun
CDKN2A	rs10811661	9p21	0.04	literature	23193118	Machiela MJ, Lindstr≈m S, Allen NE, Haiman CA, Albanes D, Barricarte A, et al. Association of type 2 diabetes susceptibility variants with advanced prostate cancer risk in the Breast and Prostate Cancer Cohort Consortium. Am J Epidemiol. 2012 Dec 15;176(12):1121-9.
CDKN2B	rs17694493	9p21.3	1e-06	GWASTABLE	25217961	Al Olama AA	2014-09-14	Nat Genet
CEP152	rs784411	15q21.1 x 11q13.3	1e-07	GWASTABLE	22219177	Tao S	2012-01-04	Carcinogenesis
CHEK2	rs78554043	22q12.1	8e-10	GWASTABLE	29117387	Conti DV	2017-08-01	J Natl Cancer Inst
CHL1	rs12485321	3p26.3 x 7q21.3	3e-06	GWASTABLE	22219177	Tao S	2012-01-04	Carcinogenesis
CHMP2B	rs2660753	3p12.1	0.007	literature	22549899	Bensen JT, Xu Z, Smith GJ, Mohler JL, Fontham ET, Taylor JA. Genetic polymorphism and prostate cancer aggressiveness: a case-only study of 1,536 GWAS and candidate SNPs in African-Americans and European-Americans. Prostate. 2013 Jan;73(1):11-22.
CHST9	rs6983561	18q12.1	0.003	literature	21557267	Liu M, Suzuki M, Arai T, Sawabe M, Enomoto Y, Nishimatsu H, Kume H, Homma Y, Kitamura T. A replication study examining three common single-nucleotide polymorphisms and the risk of prostate cancer in a Japanese population. Prostate. 2011 Jul;71(10):1023-32.
CLDN11	rs10936632	3q26.2	7e-22	GWASTABLE	21743467	Kote-Jarai Z	2011-07-10	Nat Genet
CNGB3	rs4961199	8q21.3	2.79x10-2	literature	18264096	Thomas G, Jacobs KB, Yeager M, Kraft P, Wacholder S, Orr N, Yu K, Chatterjee N, et al. Multiple loci identified in a genome-wide association study of prostate cancer. Nat Genet. 2008 Mar;40(3):310-5.
CNNM2	rs3850699	10q24.32	5e-10	GWASTABLE	23535732	Eeles RA	2013-04-01	Nat Genet
CNTN6	rs6763848	3p26.3 x 22q13.1	4e-06	GWASTABLE	22219177	Tao S	2012-01-04	Carcinogenesis
COMMD3	rs116940348	10p12.31	1e-14	GWAS Database	28139693	Hoffmann TJ1,2, Passarelli MN1, Graff RE1, Emami NC1, Sakoda LC3, Jorgenson E3, Habel LA3, Shan J3, Ranatunga DK3, Quesenberry CP3, Chao CR4, Ghai NR4, Aaronson D5, Presti J5, Nordström T6, Wang Z7, Berndt SI7, Chanock SJ7, Mosley JD8, Klein RJ9,10,11,12, Middha M9,10,11,12, Lilja H10,11,12, Melander O13, Kvale MN2, Kwok PY2, Schaefer C3, Risch N1,2,3, Van Den Eeden SK3,14, Witte JS1,2,14. Genome…
COX18	rs10009409	4q13.3	2e-10	GWASTABLE	25217961	Al Olama AA	2014-09-14	Nat Genet
COX18	rs1894292	4q13.3	5e-13	GWASTABLE	23535732	Eeles RA	2013-04-01	Nat Genet
CPNE3	rs4961199	8q21	0.01	literature	21390317	Lindstrom S, Schumacher F, Siddiq A, Travis RC, Campa D, et al. Characterizing associations and SNP-environment interactions for GWAS-identified prostate cancer risk markers--results from BPC3. PLoS One. 2011 Feb 24;6(2):e17142.
CPNE3	rs4961199	8q21	2.79x10-2	literature	18264096	Thomas G, Jacobs KB, Yeager M, Kraft P, Wacholder S, Orr N, Yu K, Chatterjee N, et al. Multiple loci identified in a genome-wide association study of prostate cancer. Nat Genet. 2008 Mar;40(3):310-5.
CTBP2	rs4962416	10q26.13	1.05x10-7	literature	21372204	Ciampa J, Yeager M, Amundadottir L, Jacobs K, Kraft P, Chung C, et al. Large-scale exploration of gene-gene interactions in prostate cancer using a multistage genome-wide association study. Cancer Res. 2011 May 1;71(9):3287-95.
CTBP2	rs4962416	10q26.13	0.03	literature	20460480	Gallagher DJ, Vijai J, Cronin AM, Bhatia J, Vickers AJ. Et al. Susceptibility loci associated with prostate cancer progression and mortality. Clin Cancer Res. 2010 May 15;16(10):2819-32.
CTBP2	rs4962416	10q26.13	7.85x10-3	literature	20564319	Kim ST, Cheng Y, Hsu FC, Jin T, Kader AK, Zheng SL, Isaacs WB, Xu J, Sun J. Prostate cancer risk-associated variants reported from genome-wide association studies: meta-analysis and their contribution to genetic Variation. Prostate. 2010 Dec 1;70(16):1729-38.
CTBP2	rs4962416	10q26.13	2e-07	nggri	21743467	Kote-Jarai Z, Olama AA, Giles GG Seven prostate cancer susceptibility loci identified by a multi-stage genome-wide association study.2011 Jul 10;43(8):785-91
CTBP2	rs4962416	10q26.13	7.92x10-5	literature	21390317	Lindstrom S, Schumacher F, Siddiq A, Travis RC, Campa D, et al. Characterizing associations and SNP-environment interactions for GWAS-identified prostate cancer risk markers--results from BPC3. PLoS One. 2011 Feb 24;6(2):e17142.
CTBP2	rs4962416	10q26.13	0.004	literature	20690139	Liu H, Wang B, Han C. Meta-analysis of genome-wide and replication association studies on prostate cancer. Prostate. 2011 Feb 1;71(2):209-24.
CTBP2	rs4962416	10q26.13	0.05	literature	22459122	Tsilidis KK, Travis RC, Appleby PN, Allen NE, Lindstrom S, Schumacher FR, et al. Interactions between genome-wide significant genetic variants and circulating concentrations of insulin-like growth factor 1, sex hormones, and binding proteins in relation to prostate cancer risk in the National Cancer Institute Breast and Prostate Cancer Cohort Consortium. Am J Epidemiol. 2012 May 1;175(9):926-35.
CTBP2	rs4962416	10q26.13	6.0x10-3	literature	19116992	Wiklund F, Zheng SL, Sun J, Adami HO, Lilja H, Hsu FC, et al. Association of reported prostate cancer risk alleles with PSA levels among men without a diagnosis of prostate cancer. Prostate. 2009 Mar 1;69(4):419-27.
CTBP2	rs4962416	10q26.13	2e-07	GWASTABLE	18264096	Thomas G	2008-02-10	Nat Genet
CTDSPL	rs9311171	3p21.3	2e-06	nggri	21743467	Kote-Jarai Z, Olama AA, Giles GG Seven prostate cancer susceptibility loci identified by a multi-stage genome-wide association study.2011 Jul 10;43(8):785-91
CTDSPL	rs9311171	3p22.2	2e-06	GWASTABLE	17903305	Murabito JM	2007-09-19	BMC Med Genet
CWC22	rs16867225 x rs1859962	2q31.3 x 17q24.3	3e-06	GWASTABLE	22219177	Tao S	2012-01-04	Carcinogenesis
CYP17A1	rs10786712	10q24.3	0.03	literature	22542949	Kwon EM, Holt SK, Fu R, Kolb S, Williams G, Stanford JL, Ostrander EA. Androgen metabolism and JAK/STAT pathway genes and prostate cancer risk. Cancer Epidemiol. 2012 Aug;36(4):347-53.
CYP21A2	rs3096702	6p21.32	5e-09	GWASTABLE	23535732	Eeles RA	2013-04-01	Nat Genet
DAB21P	rs1571801	9p21	2.01x10-3	literature	21372204	Ciampa J, Yeager M, Amundadottir L, Jacobs K, Kraft P, Chung C, et al. Large-scale exploration of gene-gene interactions in prostate cancer using a multistage genome-wide association study. Cancer Res. 2011 May 1;71(9):3287-95.
DAB21P	rs1571801	9p21	1.46x10-3	literature	18073375	Duggan D, Zheng SL, Knowlton M, Benitez D, Dimitrov L, Wiklund F, Robbins C. et al. Two genome-wide association studies of aggressive prostate cancer implicate putative prostate tumor suppressor gene DAB2IP. J Natl Cancer Inst. 2007 Dec 19;99(24):1836-44.
DAB2IP	rs1571801		0.03	literature	22077888	McGuire BB, Helfand BT, Kundu S, Hu Q, Banks JA, Cooper P, Catalona WJ. Association of prostate cancer risk alleles with unfavourable pathological characteristics in potential candidates for active surveillance. BJU Int. 2012 Aug;110(3):338-43.
DBIL5P	rs684232	17p13.3	5e-15	GWASTABLE	23535732	Eeles RA	2013-04-01	Nat Genet
DDHD1	rs8008270	14q22.1	2e-14	GWASTABLE	23535732	Eeles RA	2013-04-01	Nat Genet
DERL1	rs13259131	8q24.13	5.25x10-5	literature	21960693	Feng J, Sun J, Kim ST, Lu Y, Wang Z, Zhang Z, Gronberg H, Isaacs WB, Zheng SL, Xu J. A genome-wide survey over the ChIP-on-chip identified androgen receptor-binding genomic regions identifies a novel prostate cancer susceptibility locus at 12q13.13. Cancer Epidemiol Biomarkers Prev. 2011 Nov;20(11):2396-403.
DLEU1	rs202346	13q14.3	3e-22	GWASTABLE	28139693	Hoffmann TJ	2017-01-31	Nat Commun
DNAH12	rs1916284 x rs12418451	3p14.3 x 11q13.3	1e-06	GWASTABLE	22219177	Tao S	2012-01-04	Carcinogenesis
DNAH5	rs4463179 x rs887391	5p15.2 x 19q13.2	2e-06	GWASTABLE	22219177	Tao S	2012-01-04	Carcinogenesis
EBF2	rs11135910	8p21.2	8e-11	GWASTABLE	23535732	Eeles RA	2013-04-01	Nat Genet
EEFSEC	rs10934853	3q21.3	0.001	literature	19767754	Gudmundsson J, Sulem P, Gudbjartsson DF, Blondal T, Gylfason A, Agnarsson BA. Et al. Genome-wide association and replication studies identify four variants associated with prostate cancer susceptibility. Nat Genet. 2009 Oct;41(10):1122-6.
EEFSEC	rs10934853	3q21.3	7.43x10-5	literature	20564319	Kim ST, Cheng Y, Hsu FC, Jin T, Kader AK, Zheng SL, Isaacs WB, Xu J, Sun J. Prostate cancer risk-associated variants reported from genome-wide association studies: meta-analysis and their contribution to genetic Variation. Prostate. 2010 Dec 1;70(16):1729-38.
EEFSEC	rs10934853	3q21.3	3e-10	nggri	21743057	Schumacher FR, Berndt SI, Siddiq A, Genome-wide association study identifies new prostate cancer susceptibility loci. 2011 Oct 1;20(19):3867-75.
EEFSEC	rs4857841	3q21.3	6.79x10-6	literature	21372204	Ciampa J, Yeager M, Amundadottir L, Jacobs K, Kraft P, Chung C, et al. Large-scale exploration of gene-gene interactions in prostate cancer using a multistage genome-wide association study. Cancer Res. 2011 May 1;71(9):3287-95.
EEFSEC	rs4857841	3q21.3	3.30x10-3	literature	19767754	Gudmundsson J, Sulem P, Gudbjartsson DF, Blondal T, Gylfason A, Agnarsson BA. Et al. Genome-wide association and replication studies identify four variants associated with prostate cancer susceptibility. Nat Genet. 2009 Oct;41(10):1122-6.
EEFSEC	rs4857841	3q21.3	2.32x10-8	literature	21390317	Lindstrom S, Schumacher F, Siddiq A, Travis RC, Campa D, et al. Characterizing associations and SNP-environment interactions for GWAS-identified prostate cancer risk markers--results from BPC3. PLoS One. 2011 Feb 24;6(2):e17142.
EEFSEC	rs4857841	3q21.3	0.001	literature	22459122	Tsilidis KK, Travis RC, Appleby PN, Allen NE, Lindstrom S, Schumacher FR, et al. Interactions between genome-wide significant genetic variants and circulating concentrations of insulin-like growth factor 1, sex hormones, and binding proteins in relation to prostate cancer risk in the National Cancer Institute Breast and Prostate Cancer Cohort Consortium. Am J Epidemiol. 2012 May 1;175(9):926-35.
EHBP1	rs17432497	2p15	6.49x10-3	literature	21372204	Ciampa J, Yeager M, Amundadottir L, Jacobs K, Kraft P, Chung C, et al. Large-scale exploration of gene-gene interactions in prostate cancer using a multistage genome-wide association study. Cancer Res. 2011 May 1;71(9):3287-95.
EHBP1	rs2430386	2p15	9e-12	GWASTABLE	25939597	Berndt SI	2015-05-05	Nat Commun
EHBP1	rs2710646	2p15	2.5x10-3	literature	19767754	Gudmundsson J, Sulem P, Gudbjartsson DF, Blondal T, Gylfason A, Agnarsson BA. Et al. Genome-wide association and replication studies identify four variants associated with prostate cancer susceptibility. Nat Genet. 2009 Oct;41(10):1122-6.
EHBP1	rs2710646	2p15	0.002	literature	20690139	Liu H, Wang B, Han C. Meta-analysis of genome-wide and replication association studies on prostate cancer. Prostate. 2011 Feb 1;71(2):209-24.
EHBP1	rs2710647	2p15	3.56x10-2	literature	19767753	Eeles RA, Kote-Jarai Z, Al Olama AA, Giles GG, Guy M, Severi G, Muir K. et al. Identification of seven new prostate cancer susceptibility loci through a genome-wide association study. Nat Genet. 2009 Oct;41(10):1116-21.
EHBP1	rs2710647	2p15	2.8x10-5	literature	21637779	Haiman CA, Chen GK, Blot WJ, Strom SS, Berndt SI, Kittles RA. Et al. Characterizing genetic risk at known prostate cancer susceptibility loci in African Americans. PLoS Genet. 2011 May;7(5):e1001387.
EHBP1	rs6545977	2p15	5e-07	GWASTABLE	19767753	Eeles RA	2009-09-20	Nat Genet
EHBP1	rs721048	2p15	4.7x10-5	literature	19567509	Breyer JP, McReynolds KM, Yaspan BL, Bradley KM, Dupont WD, Smith JR. Genetic variants and prostate cancer risk: candidate replication and exploration of viral restriction genes. Cancer Epidemiol Biomarkers Prev. 2009 Jul;18(7):2137-44.
EHBP1	rs721048	2p15	0.02	literature	21637779	Haiman CA, Chen GK, Blot WJ, Strom SS, Berndt SI, Kittles RA. Et al. Characterizing genetic risk at known prostate cancer susceptibility loci in African Americans. PLoS Genet. 2011 May;7(5):e1001387.
EHBP1	rs721048	2p15	1.22x10-5	literature	20564319	Kim ST, Cheng Y, Hsu FC, Jin T, Kader AK, Zheng SL, Isaacs WB, Xu J, Sun J. Prostate cancer risk-associated variants reported from genome-wide association studies: meta-analysis and their contribution to genetic Variation. Prostate. 2010 Dec 1;70(16):1729-38.
EHBP1	rs721048	2p15	2.47x10-5	literature	21390317	Lindstrom S, Schumacher F, Siddiq A, Travis RC, Campa D, et al. Characterizing associations and SNP-environment interactions for GWAS-identified prostate cancer risk markers--results from BPC3. PLoS One. 2011 Feb 24;6(2):e17142.
EHBP1	rs721048	2p15	0.04	literature	21756274	Liu F, Hsing AW, Wang X, Shao Q, Qi J, Ye Y, Wang Z, Chen H, Gao X, et al. Systematic confirmation study of reported prostate cancer risk-associated single nucleotide polymorphisms in Chinese men. Cancer Sci. 2011 Oct;102(10):1916-20.
EHBP1	rs721048	2p15	8e-09	nggri	21743057	Schumacher FR, Berndt SI, Siddiq A, Genome-wide association study identifies new prostate cancer susceptibility loci. 2011 Oct 1;20(19):3867-75.
EHBP1	rs721048	2p15	0.02	literature	22459122	Tsilidis KK, Travis RC, Appleby PN, Allen NE, Lindstrom S, Schumacher FR, et al. Interactions between genome-wide significant genetic variants and circulating concentrations of insulin-like growth factor 1, sex hormones, and binding proteins in relation to prostate cancer risk in the National Cancer Institute Breast and Prostate Cancer Cohort Consortium. Am J Epidemiol. 2012 May 1;175(9):926-35.
EHBP1	rs721048	2p15	8e-09	GWASTABLE	18264098	Gudmundsson J	2008-02-10	Nat Genet
EHF	rs4378355	11p13	2e-10	GWASTABLE	28139693	Hoffmann TJ	2017-01-31	Nat Commun
EIF2S3	rs6627995	Xp22.11	1e-13	GWASTABLE	28139693	Hoffmann TJ	2017-01-31	Nat Commun
ELA2A	rs2901964	1p36.21	5e-06	erdisfanct/nggri	20932654	Kerns SL, Ostrer H, Stock R, Genome-wide association study to identify single nucleotide polymorphisms (SNPs) associated with the development of erectile dysfunction in African-American men after radiotherapy for prostate cancer. 2010 Dec 1;78(5):1292-300.
ELAC2	rs11545302	17p11.2	1.0x10-5	literature	20086112	Beuten J, Gelfond JA, Franke JL, Shook S, Johnson-Pais TL, Thompson IM, Leach RJ. Single and multivariate associations of MSR1, ELAC2, and RNASEL with prostate cancer in an ethnic diverse cohort of men. Cancer Epidemiol Biomarkers Prev. 2010 Feb;19(2):588-99.
ELAC2	rs17552022	17p11.2	0.03	literature	20086112	Beuten J, Gelfond JA, Franke JL, Shook S, Johnson-Pais TL, Thompson IM, Leach RJ. Single and multivariate associations of MSR1, ELAC2, and RNASEL with prostate cancer in an ethnic diverse cohort of men. Cancer Epidemiol Biomarkers Prev. 2010 Feb;19(2):588-99.
EPHA10	rs731174 x rs4430796	1p34.3 x 17q12	5e-06	GWASTABLE	22219177	Tao S	2012-01-04	Carcinogenesis
ERG	rs2836370	21q22.3	0.01	literature	22844442	Huang SP, Bao BY, Hour TC, Huang CY, Yu CC, Liu CC, Lee YC, Huang CN, Pao JB, Huang CH. Genetic variants in CASP3, BMP5, and IRS2 genes may influence survival in prostate cancer patients receiving androgen-deprivation therapy. PLoS One. 2012;7(7):e41219.
ESR2	rs58262369	14q23.2	6e-10	GWAS Database	26443449	Wang M1,2,3, Takahashi A4, Liu F et al. Large-scale association analysis in Asians identifies new susceptibility loci for prostate cancer. Nat Commun. 2015 Oct 7;6:8469. doi: 10.1038/ncomms9469.
EVC x PPP1R14A	rs735172 x rs887391	4p16.2 x 19q13.2	2e-06	GWASTABLE	22219177	Tao S	2012-01-04	Carcinogenesis
FAM111A-FAM111B	rs1938781	11q12.1	1.10x10-10	literature	22366784	Akamatsu S, Takata R, Haiman CA, Takahashi A, Inoue T, et al. Common variants at 11q12, 10q26 and 3p11.2 are associated with prostate cancer susceptibility in Japanese. Nat Genet. 2012 Feb 26;44(4):426-9.
FAM124A	rs10492519	13q14.3	5.6x10-6	literature	18073375	Duggan D, Zheng SL, Knowlton M, Benitez D, Dimitrov L, Wiklund F, Robbins C. et al. Two genome-wide association studies of aggressive prostate cancer implicate putative prostate tumor suppressor gene DAB2IP. J Natl Cancer Inst. 2007 Dec 19;99(24):1836-44.
FAM82A1	rs6741148	2p22.2	4e-06	erdisfanct/nggri	20932654	Kerns SL, Ostrer H, Stock R, Genome-wide association study to identify single nucleotide polymorphisms (SNPs) associated with the development of erectile dysfunction in African-American men after radiotherapy for prostate cancer. 2010 Dec 1;78(5):1292-300.
FAM84B	rs10505476	8q24.13	0.04	literature	22549899	Bensen JT, Xu Z, Smith GJ, Mohler JL, Fontham ET, Taylor JA. Genetic polymorphism and prostate cancer aggressiveness: a case-only study of 1,536 GWAS and candidate SNPs in African-Americans and European-Americans. Prostate. 2013 Jan;73(1):11-22.
FAM84B	rs13254738	8q24.13	0.03	literature	22549899	Bensen JT, Xu Z, Smith GJ, Mohler JL, Fontham ET, Taylor JA. Genetic polymorphism and prostate cancer aggressiveness: a case-only study of 1,536 GWAS and candidate SNPs in African-Americans and European-Americans. Prostate. 2013 Jan;73(1):11-22.
FAM84B	rs1456305	8q24.13	0.04	literature	22549899	Bensen JT, Xu Z, Smith GJ, Mohler JL, Fontham ET, Taylor JA. Genetic polymorphism and prostate cancer aggressiveness: a case-only study of 1,536 GWAS and candidate SNPs in African-Americans and European-Americans. Prostate. 2013 Jan;73(1):11-22.
FAM84B	rs2293850	8q24.13	0.01	literature	22549899	Bensen JT, Xu Z, Smith GJ, Mohler JL, Fontham ET, Taylor JA. Genetic polymorphism and prostate cancer aggressiveness: a case-only study of 1,536 GWAS and candidate SNPs in African-Americans and European-Americans. Prostate. 2013 Jan;73(1):11-22.
FAM84B	rs6993569	8q24.13	0.03	literature	22549899	Bensen JT, Xu Z, Smith GJ, Mohler JL, Fontham ET, Taylor JA. Genetic polymorphism and prostate cancer aggressiveness: a case-only study of 1,536 GWAS and candidate SNPs in African-Americans and European-Americans. Prostate. 2013 Jan;73(1):11-22.
FARP2	rs3771570	2q37.3	5.22x10-9	literature	23535732	Eeles RA, Olama AA, Benlloch S, Saunders EJ, Leongamornlert DA, Tymrakiewicz M, et al. Identification of 23 new prostate cancer susceptibility loci using the iCOGS custom genotyping array. Nat Genet. 2013 Apr;45(4):385-91.
FBXO34	rs8015211	14q22.1	1.64x10-5	literature	21467234	FitzGerald LM, Kwon EM, Conomos MP, Kolb S, Holt SK, Levine D, Feng Z, Ostrander EA, Stanford JL. Genome-wide association study identifies a genetic variant associated with risk for more aggressive prostate cancer. Cancer Epidemiol Biomarkers Prev. 2011 Jun;20(6):1196-203.
FCHSD1	rs251177	5q31.3	0.0002	literature	18073375	Duggan D, Zheng SL, Knowlton M, Benitez D, Dimitrov L, Wiklund F, Robbins C. et al. Two genome-wide association studies of aggressive prostate cancer implicate putative prostate tumor suppressor gene DAB2IP. J Natl Cancer Inst. 2007 Dec 19;99(24):1836-44.
FERMT2	rs8008270	14q22.1	1.78x10-14	literature	23535732	Eeles RA, Olama AA, Benlloch S, Saunders EJ, Leongamornlert DA, Tymrakiewicz M, et al. Identification of 23 new prostate cancer susceptibility loci using the iCOGS custom genotyping array. Nat Genet. 2013 Apr;45(4):385-91.
FGF10	rs2121875	5p13-p12	4.0x10-8	literature	18708398	Kote-Jarai Z, Easton DF, Stanford JL, Ostrander EA, Schleutker J, Ingles SA, et al. Multiple novel prostate cancer predisposition loci confirmed by an international study: the PRACTICAL Consortium. Cancer Epidemiol Biomarkers Prev. 2008 Aug;17(8):2052-61.
FGF10	rs2121875	5p13-p12	4e-08	nggri	21743057	Schumacher FR, Berndt SI, Siddiq A, Genome-wide association study identifies new prostate cancer susceptibility loci. 2011 Oct 1;20(19):3867-75.
FGF10	rs2121875	5p12	4e-08	GWASTABLE	21743467	Kote-Jarai Z	2011-07-10	Nat Genet
FGFR2	rs10749415	10q26.13, 10q26.12	4e-43	GWASTABLE	28139693	Hoffmann TJ	2017-01-31	Nat Commun
FGFR2	rs10886902	10q26.12	2e-53	GWASTABLE	28139693	Hoffmann TJ	2017-01-31	Nat Commun
FOXP4	rs1983891	6p21.1	7.6x10-8	literature	22132073	Batra J, Lose F, O'Mara T, Marquart L, Stephens C, Alexander K, Srinivasan S, Eeles RA, Easton DF, Al Olama AA, Kote-Jarai Z, Guy M, Muir K, Lophatananon A, Rahman AA, Neal DE, Hamdy FC, Donovan JL, Chambers S, Gardiner RA, Aitken J, Yaxley J, Kedda MA, Clements JA, Spurdle AB. Association between Prostinogen (KLK15) genetic variants and prostate cancer risk and aggressiveness in Australia and a …
FOXP4	rs1983891	6p21.1	0.02	literature	21637779	Haiman CA, Chen GK, Blot WJ, Strom SS, Berndt SI, Kittles RA. Et al. Characterizing genetic risk at known prostate cancer susceptibility loci in African Americans. PLoS Genet. 2011 May;7(5):e1001387.
FOXP4	rs1983891	6p21.1	2.48x10-4	literature	22056501	Lindstr≈m S, Schumacher FR, Campa D, Albanes D, Andriole G. Replication of five prostate cancer loci identified in an Asian population--results from the NCI Breast and Prostate Cancer Cohort Consortium (BPC3). Cancer Epidemiol Biomarkers Prev. 2012 Jan;21(1):212-6.
FOXP4	rs1983891	6p21.1	2.48x10-4	literature	21390317	Lindstrom S, Schumacher F, Siddiq A, Travis RC, Campa D, et al. Characterizing associations and SNP-environment interactions for GWAS-identified prostate cancer risk markers--results from BPC3. PLoS One. 2011 Feb 24;6(2):e17142.
FOXP4	rs1983891	6p21.1	6.22x10-5	literature	22662242	Long QZ, Du YF, Ding XY, Li X, Song WB, Yang Y, Zhang P, Zhou JP, Liu XG. Replication and fine mapping for association of the C2orf43, FOXP4, GPRC6A and RFX6 genes with prostate cancer in the Chinese population. PLoS One. 2012;7(5):e37866.
FOXP4	rs1983891	6p21.1	8e-08	nggri	21743057	Schumacher FR, Berndt SI, Siddiq A, Genome-wide association study identifies new prostate cancer susceptibility loci. 2011 Oct 1;20(19):3867-75.
FOXP4	rs1983891	6p21.1	8e-08	GWASTABLE	20676098	Takata R	2010-08-01	Nat Genet
FREM1	rs1552895	9p22.3	0.002	literature	17876339	Nam RK, Zhang WW, Loblaw DA, Klotz LH, Trachtenberg J, Jewett MA, et al. A genome-wide association screen identifies regions on chromosomes 1q25 and 7p21 as risk loci for sporadic prostate cancer. Prostate Cancer Prostatic Dis. 2008;11(3):241-6.
FSHR	rs2268363	2p21-p16	5e-08	erdisfanct/nggri	20932654	Kerns SL, Ostrer H, Stock R, Genome-wide association study to identify single nucleotide polymorphisms (SNPs) associated with the development of erectile dysfunction in African-American men after radiotherapy for prostate cancer. 2010 Dec 1;78(5):1292-300.
FTO	rs9939609	16q12.2	0.04	literature	23193118	Machiela MJ, Lindstr≈m S, Allen NE, Haiman CA, Albanes D, Barricarte A, et al. Association of type 2 diabetes susceptibility variants with advanced prostate cancer risk in the Breast and Prostate Cancer Cohort Consortium. Am J Epidemiol. 2012 Dec 15;176(12):1121-9.
FYCO1	rs1545985	3p21.3	6.61x10-6	literature	18073375	Duggan D, Zheng SL, Knowlton M, Benitez D, Dimitrov L, Wiklund F, Robbins C. et al. Two genome-wide association studies of aggressive prostate cancer implicate putative prostate tumor suppressor gene DAB2IP. J Natl Cancer Inst. 2007 Dec 19;99(24):1836-44.
FYCO1	rs7652331	3p21.3	4.47x10-4	literature	18073375	Duggan D, Zheng SL, Knowlton M, Benitez D, Dimitrov L, Wiklund F, Robbins C. et al. Two genome-wide association studies of aggressive prostate cancer implicate putative prostate tumor suppressor gene DAB2IP. J Natl Cancer Inst. 2007 Dec 19;99(24):1836-44.
GADD45A	rs3783501	1p31.2	0.03	literature	21373201	Campa D, H?sing A, Stein A, Dostal L, Boeing H, Pischon T, et al. Genetic variability of the mTOR pathway and prostate cancer risk in the European Prospective Investigation on Cancer (EPIC). PLoS One. 2011 Feb 23;6(2):e16914.
GADD45A	rs520820	1p31.2	0.02	literature	21373201	Campa D, H?sing A, Stein A, Dostal L, Boeing H, Pischon T, et al. Genetic variability of the mTOR pathway and prostate cancer risk in the European Prospective Investigation on Cancer (EPIC). PLoS One. 2011 Feb 23;6(2):e16914.
GALNTL6	rs494770	4q34.1	0.01	literature	17876339	Nam RK, Zhang WW, Loblaw DA, Klotz LH, Trachtenberg J, Jewett MA, et al. A genome-wide association screen identifies regions on chromosomes 1q25 and 7p21 as risk loci for sporadic prostate cancer. Prostate Cancer Prostatic Dis. 2008;11(3):241-6.
GGC	RS10187424	7p15-p14	3.1x10-15	literature	21743467	Kote-Jarai Z, Olama AA, Giles GG, Severi G, Schleutker J, Weischer M, Campa D, et al. Seven prostate cancer susceptibility loci identified by a multi-stage genome-wide association study. Nat Genet. 2011 Jul 10;43(8):785-91.
GGCX	rs10187424	2p11.2	3e-15	GWASTABLE	21743467	Kote-Jarai Z	2011-07-10	Nat Genet
GGCX	rs2028898	2p12	1.08x10-7	literature	22366784	Akamatsu S, Takata R, Haiman CA, Takahashi A, Inoue T, et al. Common variants at 11q12, 10q26 and 3p11.2 are associated with prostate cancer susceptibility in Japanese. Nat Genet. 2012 Feb 26;44(4):426-9.
GHR	rs2940919	5p14-p12	3.77x10-4	literature	21960693	Feng J, Sun J, Kim ST, Lu Y, Wang Z, Zhang Z, Gronberg H, Isaacs WB, Zheng SL, Xu J. A genome-wide survey over the ChIP-on-chip identified androgen receptor-binding genomic regions identifies a novel prostate cancer susceptibility locus at 12q13.13. Cancer Epidemiol Biomarkers Prev. 2011 Nov;20(11):2396-403.
GHR	rs2940920	5p14-p12	3.76x10-4	literature	21960693	Feng J, Sun J, Kim ST, Lu Y, Wang Z, Zhang Z, Gronberg H, Isaacs WB, Zheng SL, Xu J. A genome-wide survey over the ChIP-on-chip identified androgen receptor-binding genomic regions identifies a novel prostate cancer susceptibility locus at 12q13.13. Cancer Epidemiol Biomarkers Prev. 2011 Nov;20(11):2396-403.
GLI2	rs11122834	2q14	5e-06	erdisfanct/nggri	20932654	Kerns SL, Ostrer H, Stock R, Genome-wide association study to identify single nucleotide polymorphisms (SNPs) associated with the development of erectile dysfunction in African-American men after radiotherapy for prostate cancer. 2010 Dec 1;78(5):1292-300.
GLIS2	rs9921192	16p13.3	1e-09	GWASTABLE	28139693	Hoffmann TJ	2017-01-31	Nat Commun
GOLPH3L	rs17599629	1q21.3	6e-11	GWASTABLE	25217961	Al Olama AA	2014-09-14	Nat Genet
GPR143	rs2405942	Xp22.2	2e-10	GWASTABLE	23535732	Eeles RA	2013-04-01	Nat Genet
GPRC6A	rs339331	6q22.31	1.6x10-12	literature	22114074	Wang M, Liu F, Hsing AW, Wang X, Shao Q, Qi J, Ye Y, Wang Z, Chen H, et al. Replication and cumulative effects of GWAS-identified genetic variations for prostate cancer in Asians: a case-control study in the ChinaPCa consortium. Carcinogenesis. 2012 Feb;33(2):356-60.
GPRC6A	rs339331	6q22.1	2e-12	GWASTABLE	20676098	Takata R	2010-08-01	Nat Genet
GPRC6A	rs339331	6q22.31	2.8x10-9	literature	22132073	Batra J, Lose F, O'Mara T, Marquart L, Stephens C, Alexander K, Srinivasan S, Eeles RA, Easton DF, Al Olama AA, Kote-Jarai Z, Guy M, Muir K, Lophatananon A, Rahman AA, Neal DE, Hamdy FC, Donovan JL, Chambers S, Gardiner RA, Aitken J, Yaxley J, Kedda MA, Clements JA, Spurdle AB. Association between Prostinogen (KLK15) genetic variants and prostate cancer risk and aggressiveness in Australia and a …
GPRC6A	rs339331	6q22.31	0.001	literature	22056502	Lindstr≈m S, Schumacher FR, Campa D, Albanes D, Andriole G, Berndt SI, et al. Replication of five prostate cancer loci identified in an Asian population--results from the NCI Breast and Prostate Cancer Cohort Consortium (BPC3). Cancer Epidemiol Biomarkers Prev. 2012 Jan;21(1):212-6.
GPRC6A	rs339331	6q22.31	0.002	literature	22056501	Lindstr≈m S, Schumacher FR, Campa D, Albanes D, Andriole G. Replication of five prostate cancer loci identified in an Asian population--results from the NCI Breast and Prostate Cancer Cohort Consortium (BPC3). Cancer Epidemiol Biomarkers Prev. 2012 Jan;21(1):212-6.
GPRC6A	rs339331	6q22.31	0.002	literature	21390317	Lindstrom S, Schumacher F, Siddiq A, Travis RC, Campa D, et al. Characterizing associations and SNP-environment interactions for GWAS-identified prostate cancer risk markers--results from BPC3. PLoS One. 2011 Feb 24;6(2):e17142.
GPRC6A	rs339331	6q22.31	1.42x10-5	literature	22662242	Long QZ, Du YF, Ding XY, Li X, Song WB, Yang Y, Zhang P, Zhou JP, Liu XG. Replication and fine mapping for association of the C2orf43, FOXP4, GPRC6A and RFX6 genes with prostate cancer in the Chinese population. PLoS One. 2012;7(5):e37866.
GTPBP5	rs2427345	20q13.33	4e-08	GWASTABLE	23535732	Eeles RA	2013-04-01	Nat Genet
HAPLN1	rs4466137	5q14.3	3e-06	nggri	21743057	Schumacher FR, Berndt SI, Siddiq A, Genome-wide association study identifies new prostate cancer susceptibility loci. 2011 Oct 1;20(19):3867-75.
HAPLN1	rs4466137	5q14.3	3e-06	GWASTABLE	17903305	Murabito JM	2007-09-19	BMC Med Genet
HERC2	rs6497287	15q13	0.004	literature	21467234	FitzGerald LM, Kwon EM, Conomos MP, Kolb S, Holt SK, Levine D, Feng Z, Ostrander EA, Stanford JL. Genome-wide association study identifies a genetic variant associated with risk for more aggressive prostate cancer. Cancer Epidemiol Biomarkers Prev. 2011 Jun;20(6):1196-203.
HLA-DRB6	rs115306967	6p21.32	3e-09	GWASTABLE	25217961	Al Olama AA	2014-09-14	Nat Genet
HNF1B	rs11263761	17q12	6e-20	GWASTABLE	28139693	Hoffmann TJ	2017-01-31	Nat Commun
HNF1B	rs11649743	17q12	3.54x10-08	literature	21576123	Berndt SI, Sampson J, Yeager M, Jacobs KB, Wang Z, et al. Large-scale fine mapping of the HNF1B locus and prostate cancer risk. Hum Mol Genet. 2011 Aug 15;20(16):3322-9.
HNF1B	rs11649743	17q12	2.70x10-4	literature	21372204	Ciampa J, Yeager M, Amundadottir L, Jacobs K, Kraft P, Chung C, et al. Large-scale exploration of gene-gene interactions in prostate cancer using a multistage genome-wide association study. Cancer Res. 2011 May 1;71(9):3287-95.
HNF1B	rs11649743	17q12	0.04	literature	21637779	Haiman CA, Chen GK, Blot WJ, Strom SS, Berndt SI, Kittles RA. Et al. Characterizing genetic risk at known prostate cancer susceptibility loci in African Americans. PLoS Genet. 2011 May;7(5):e1001387.
HNF1B	rs11649743	17q12	1.19x10-9	literature	20564319	Kim ST, Cheng Y, Hsu FC, Jin T, Kader AK, Zheng SL, Isaacs WB, Xu J, Sun J. Prostate cancer risk-associated variants reported from genome-wide association studies: meta-analysis and their contribution to genetic Variation. Prostate. 2010 Dec 1;70(16):1729-38.
HNF1B	rs11649743	17q12	8.5x10-3	literature	21756274	Liu F, Hsing AW, Wang X, Shao Q, Qi J, Ye Y, Wang Z, Chen H, Gao X, et al. Systematic confirmation study of reported prostate cancer risk-associated single nucleotide polymorphisms in Chinese men. Cancer Sci. 2011 Oct;102(10):1916-20.
HNF1B	rs11649743	17q12	2.58x10-2	literature	18361410	Sun J, Purcell L, Gao Z, Isaacs SD, Wiley KE, Hsu FC, et al. Association between sequence variants at 17q12 and 17q24.3 and prostate cancer risk in European and African Americans. Prostate. 2008 May 15;68(7):691-7.
HNF1B	rs11651052	17q12	3e-10	GWASTABLE	27262462	Teerlink CC	2016-06-04	Hum Genet
HNF1B	rs13192613	6q22.31 x 17q12	3e-06	GWASTABLE	22219177	Tao S	2012-01-04	Carcinogenesis
HNF1B	rs2005705	17q12	2.54x10-23	literature	21576123	Berndt SI, Sampson J, Yeager M, Jacobs KB, Wang Z, et al. Large-scale fine mapping of the HNF1B locus and prostate cancer risk. Hum Mol Genet. 2011 Aug 15;20(16):3322-9.
HNF1B	rs3744763	17q12	1.21x10-08	literature	21576123	Berndt SI, Sampson J, Yeager M, Jacobs KB, Wang Z, et al. Large-scale fine mapping of the HNF1B locus and prostate cancer risk. Hum Mol Genet. 2011 Aug 15;20(16):3322-9.
HNF1B	rs3760511	17q12	4.45x10-15	literature	21576123	Berndt SI, Sampson J, Yeager M, Jacobs KB, Wang Z, et al. Large-scale fine mapping of the HNF1B locus and prostate cancer risk. Hum Mol Genet. 2011 Aug 15;20(16):3322-9.
HNF1B	rs3760511	17q12	8.8x10-4	literature	18361410	Sun J, Purcell L, Gao Z, Isaacs SD, Wiley KE, Hsu FC, et al. Association between sequence variants at 17q12 and 17q24.3 and prostate cancer risk in European and African Americans. Prostate. 2008 May 15;68(7):691-7.
HNF1B	rs4239217	17q12	1.57x10-16	literature	21576123	Berndt SI, Sampson J, Yeager M, Jacobs KB, Wang Z, et al. Large-scale fine mapping of the HNF1B locus and prostate cancer risk. Hum Mol Genet. 2011 Aug 15;20(16):3322-9.
HNF1B	rs4430796	17q12	0.004	literature	20450899	Bao BY, Pao JB, Lin VC, Huang CN, Chang TY. Et al. Individual and cumulative association of prostate cancer susceptibility variants with clinicopathologic characteristics of the disease. Clin Chim Acta. 2010 Sep 6;411(17-18):1232-7.
HNF1B	rs4430796	17q12	1.62x10-24	literature	21576123	Berndt SI, Sampson J, Yeager M, Jacobs KB, Wang Z, et al. Large-scale fine mapping of the HNF1B locus and prostate cancer risk. Hum Mol Genet. 2011 Aug 15;20(16):3322-9.
HNF1B	rs4430796	17q12	0.05	literature	21071540	Chang BL, Spangler E, Gallagher S, Haiman CA, Henderson B, Isaacs W. et al. Validation of genome-wide prostate cancer associations in men of African descent. Cancer Epidemiol Biomarkers Prev. 2011 Jan;20(1):23-32.
HNF1B	rs4430796	17q12	1.85x10-11	literature	21372204	Ciampa J, Yeager M, Amundadottir L, Jacobs K, Kraft P, Chung C, et al. Large-scale exploration of gene-gene interactions in prostate cancer using a multistage genome-wide association study. Cancer Res. 2011 May 1;71(9):3287-95.
HNF1B	rs4430796	17q12	3.2x10-6	literature	19366831	Fitzgerald LM, Kwon EM, Koopmeiners JS, Salinas CA, Stanford JL, Ostrander EA. Analysis of recently identified prostate cancer susceptibility loci in a population-based study: associations with family history and clinical features. Clin Cancer Res. 2009 May 1;15(9):3231-7.
HNF1B	rs4430796	17q12	1e-09	nggri	21467234	FitzGerald LM, Kwon EM, Conomos MP, Genome-wide association study identifies a genetic variant associated with risk for more aggressive prostate cancer. 2011 Jun;20(6):1196-203
HNF1B	rs4430796	17q12	2.00x10-4	literature	22730461	Grisanzio C, Werner L, Takeda D, Awoyemi BC, Pomerantz MM. et al. Genetic and functional analyses implicate the NUDT11, HNF1B, and SLC22A3 genes in prostate cancer pathogenesis. Proc Natl Acad Sci U S A. 2012 Jul 10;109(28):11252-7.
HNF1B	rs4430796	17q12	3x10-10	literature	21160077	Gudmundsson J, Besenbacher S, Sulem P, Gudbjartsson DF, Olafsson I, et al. Genetic correction of PSA values using sequence variants associated with PSA levels. Sci Transl Med. 2010 Dec 15;2(62):62ra92.
HNF1B	rs4430796	17q12	8.3x10-6	literature	19767754	Gudmundsson J, Sulem P, Gudbjartsson DF, Blondal T, Gylfason A, Agnarsson BA. Et al. Genome-wide association and replication studies identify four variants associated with prostate cancer susceptibility. Nat Genet. 2009 Oct;41(10):1122-6.
HNF1B	rs4430796	17q12	0.04	literature	17603485	Gudmundsson J, Sulem P, Steinthorsdottir V, Bergthorsson JT, Thorleifsson G, Manolescu A, Rafnar T, et al. Two variants on chromosome 17 confer prostate cancer risk, and the one in TCF2 protects against type 2 diabetes. Nat Genet. 2007 Aug;39(8):977-83. Epub 2007 Jul 1.
HNF1B	rs4430796	17q12	0.01	literature	22198737	Jin G, Lu L, Cooney KA, Ray AM, Zuhlke KA, Lange EM, Cannon-Albright LA, Camp NJ, et al. 2012. Validation of prostate cancer risk-related loci identified from genome-wide association studies using family-based association analysis: evidence from the International Consortium for Prostate Cancer Genetics (ICPCG). Hum Genet. 2012 Jul;131(7):1095-103.
HNF1B	rs4430796	17q12	1.13x10-25	literature	20564319	Kim ST, Cheng Y, Hsu FC, Jin T, Kader AK, Zheng SL, Isaacs WB, Xu J, Sun J. Prostate cancer risk-associated variants reported from genome-wide association studies: meta-analysis and their contribution to genetic Variation. Prostate. 2010 Dec 1;70(16):1729-38.
HNF1B	rs4430796	17q12	0.001	literature	20690139	Liu H, Wang B, Han C. Meta-analysis of genome-wide and replication association studies on prostate cancer. Prostate. 2011 Feb 1;71(2):209-24.
HNF1B	rs4430796	17q12	0.007	literature	21557267	Liu M, Suzuki M, Arai T, Sawabe M, Enomoto Y, Nishimatsu H, Kume H, Homma Y, Kitamura T. A replication study examining three common single-nucleotide polymorphisms and the risk of prostate cancer in a Japanese population. Prostate. 2011 Jul;71(10):1023-32.
HNF1B	rs4430796	17q12	8e-06	nggri	21743057	Schumacher FR, Berndt SI, Siddiq A, Genome-wide association study identifies new prostate cancer susceptibility loci. 2011 Oct 1;20(19):3867-75.
HNF1B	rs4430796	17q12	5.1x10-4	literature	18361410	Sun J, Purcell L, Gao Z, Isaacs SD, Wiley KE, Hsu FC, et al. Association between sequence variants at 17q12 and 17q24.3 and prostate cancer risk in European and African Americans. Prostate. 2008 May 15;68(7):691-7.
HNF1B	rs4430796	17q12	1e-11	nggri	20676098	Takata R, Akamatsu S, Kubo M, Genome-wide association study identifies five new susceptibility loci for prostate cancer in the Japanese population. 2010 Sep;42(9):751-4.
HNF1B	rs4430796	17q12	9.58x10-10	literature	18264096	Thomas G, Jacobs KB, Yeager M, Kraft P, Wacholder S, Orr N, Yu K, Chatterjee N, et al. Multiple loci identified in a genome-wide association study of prostate cancer. Nat Genet. 2008 Mar;40(3):310-5.
HNF1B	rs4430796	17q12	0.009	literature	21829199	Vijai J, Kirchhoff T, Gallagher D, Hamel N, Guha S, Darvasi A, et al. Genetic architecture of prostate cancer in the Ashkenazi Jewish population. Br J Cancer. 2011 Sep 6;105(6):864-9.
HNF1B	rs4430796	17q12	9.1x10-4	literature	19318432	Waters KM, Le Marchand L, Kolonel LN, Monroe KR, Stram DO, Henderson BE, Haiman CA. Generalizability of associations from prostate cancer genome-wide association studies in multiple populations. Cancer Epidemiol Biomarkers Prev. 2009 Apr;18(4):1285-9.
HNF1B	rs4430796	17q12	7.9x10-5	literature	19116992	Wiklund F, Zheng SL, Sun J, Adami HO, Lilja H, Hsu FC, et al. Association of reported prostate cancer risk alleles with PSA levels among men without a diagnosis of prostate cancer. Prostate. 2009 Mar 1;69(4):419-27.
HNF1B	rs4430796	17q12	4.9x10-5	literature	19726753	Yamada H, Penney KL, Takahashi H, Katoh T, Yamano Y, et al. Replication of prostate cancer risk loci in a Japanese case-control association study. J Natl Cancer Inst. 2009 Oct 7;101(19):1330-6.
HNF1B	rs4430796	17q12	6e-08	GWASTABLE	26443449	Wang M	2015-10-07	Nat Commun
HNF1B	rs4794758	17q12	4.95x10-10	literature	21576123	Berndt SI, Sampson J, Yeager M, Jacobs KB, Wang Z, et al. Large-scale fine mapping of the HNF1B locus and prostate cancer risk. Hum Mol Genet. 2011 Aug 15;20(16):3322-9.
HNF1B	rs7405696	17q12	9.35x10-23	literature	21576123	Berndt SI, Sampson J, Yeager M, Jacobs KB, Wang Z, et al. Large-scale fine mapping of the HNF1B locus and prostate cancer risk. Hum Mol Genet. 2011 Aug 15;20(16):3322-9.
HNF1B	rs7501939	17q12	1.22x10-16	literature	21576123	Berndt SI, Sampson J, Yeager M, Jacobs KB, Wang Z, et al. Large-scale fine mapping of the HNF1B locus and prostate cancer risk. Hum Mol Genet. 2011 Aug 15;20(16):3322-9.
HNF1B	rs7501939	17q12	9e-12	nggri	21602798	Haiman CA, Chen GK, Blot WJ, Genome-wide association study of prostate cancer in men of African ancestry identifies a susceptibility locus at 17q21. 2011 Jun;43(6):570-3.
HNF1B	rs7501939	17q12	0.001	literature	21756274	Liu F, Hsing AW, Wang X, Shao Q, Qi J, Ye Y, Wang Z, Chen H, Gao X, et al. Systematic confirmation study of reported prostate cancer risk-associated single nucleotide polymorphisms in Chinese men. Cancer Sci. 2011 Oct;102(10):1916-20.
HNF1B	rs7501939	17q12	0.001	literature	20690139	Liu H, Wang B, Han C. Meta-analysis of genome-wide and replication association studies on prostate cancer. Prostate. 2011 Feb 1;71(2):209-24.
HNF1B	rs7501939	17q12	2e-06	nggri	21743057	Schumacher FR, Berndt SI, Siddiq A, Genome-wide association study identifies new prostate cancer susceptibility loci. 2011 Oct 1;20(19):3867-75.
HNF1B	rs7501939	17q12	1.8x10-4	literature	18361410	Sun J, Purcell L, Gao Z, Isaacs SD, Wiley KE, Hsu FC, et al. Association between sequence variants at 17q12 and 17q24.3 and prostate cancer risk in European and African Americans. Prostate. 2008 May 15;68(7):691-7.
HNF1B	rs7501939	17q12	1e-12	GWASTABLE	20676098	Takata R	2010-08-01	Nat Genet
HNF1B	rs7501939	17q12	9e-12	GWASTABLE	18264097	Eeles RA	2008-02-10	Nat Genet
HNF1B	rs757210	17q12	1.39x10-15	literature	21576123	Berndt SI, Sampson J, Yeager M, Jacobs KB, Wang Z, et al. Large-scale fine mapping of the HNF1B locus and prostate cancer risk. Hum Mol Genet. 2011 Aug 15;20(16):3322-9.
HNF1B	rs8064454	17q12	8e-29	GWASTABLE	25939597	Berndt SI	2015-05-05	Nat Commun
HOXB13	rs138213197	8q24.21	0.006	literature	22714738	Breyer JP, Avritt TG, McReynolds KM, Dupont WD, Smith JR. Confirmation of the HOXB13 G84E germline mutation in familial prostate cancer. Cancer Epidemiol Biomarkers Prev. 2012 Aug;21(8):1348-53.
HOXB13	rs188140481	8q24.21	6e-34	GWASTABLE	23104005	Gudmundsson J	2012-10-28	Nat Genet
HSD17B3	rs2066485	9q22	0.02	literature	22542949	Kwon EM, Holt SK, Fu R, Kolb S, Williams G, Stanford JL, Ostrander EA. Androgen metabolism and JAK/STAT pathway genes and prostate cancer risk. Cancer Epidemiol. 2012 Aug;36(4):347-53.
HSD17B3	rs2253502	9q22	0.004	literature	22542949	Kwon EM, Holt SK, Fu R, Kolb S, Williams G, Stanford JL, Ostrander EA. Androgen metabolism and JAK/STAT pathway genes and prostate cancer risk. Cancer Epidemiol. 2012 Aug;36(4):347-53.
HSD17B3	rs2257157	9q22	0.03	literature	22542949	Kwon EM, Holt SK, Fu R, Kolb S, Williams G, Stanford JL, Ostrander EA. Androgen metabolism and JAK/STAT pathway genes and prostate cancer risk. Cancer Epidemiol. 2012 Aug;36(4):347-53.
HTR3B	rs11214775	11q23.2	5e-08	GWASTABLE	25217961	Al Olama AA	2014-09-14	Nat Genet
IGF2	rs7127900	11p15.5	3.06x10-1	literature	19767753	Eeles RA, Kote-Jarai Z, Al Olama AA, Giles GG, Guy M, Severi G, Muir K. et al. Identification of seven new prostate cancer susceptibility loci through a genome-wide association study. Nat Genet. 2009 Oct;41(10):1116-21.
IGF2AS	rs7127900	11p15.5	3.06x10-1	literature	19767753	Eeles RA, Kote-Jarai Z, Al Olama AA, Giles GG, Guy M, Severi G, Muir K. et al. Identification of seven new prostate cancer susceptibility loci through a genome-wide association study. Nat Genet. 2009 Oct;41(10):1116-21.
IKZF2	rs7569918	2q13.1	8.85x10-4	literature	21960693	Feng J, Sun J, Kim ST, Lu Y, Wang Z, Zhang Z, Gronberg H, Isaacs WB, Zheng SL, Xu J. A genome-wide survey over the ChIP-on-chip identified androgen receptor-binding genomic regions identifies a novel prostate cancer susceptibility locus at 12q13.13. Cancer Epidemiol Biomarkers Prev. 2011 Nov;20(11):2396-403.
IL16	rs7175701	15q26.3	9.8x10-8	literature	22923025	Batai K, Shah E, Murphy AB, Newsome J, Ruden M, Ahaghotu C, Kittles RA. Fine-mapping of IL16 gene and prostate cancer risk in African Americans. Cancer Epidemiol Biomarkers Prev. 2012 Nov;21(11):2059-68.
IL1RAPL1	rs225061	Xp22.1-p21.3	9.71x10-4	literature	21467234	FitzGerald LM, Kwon EM, Conomos MP, Kolb S, Holt SK, Levine D, Feng Z, Ostrander EA, Stanford JL. Genome-wide association study identifies a genetic variant associated with risk for more aggressive prostate cancer. Cancer Epidemiol Biomarkers Prev. 2011 Jun;20(6):1196-203.
INHBA x NR	rs7789197 x rs1447295	7p14.1 x 8q24.21	3e-06	GWASTABLE	22219177	Tao S	2012-01-04	Carcinogenesis
INS	rs7127900	11p15.5	3.06x10-1	literature	19767753	Eeles RA, Kote-Jarai Z, Al Olama AA, Giles GG, Guy M, Severi G, Muir K. et al. Identification of seven new prostate cancer susceptibility loci through a genome-wide association study. Nat Genet. 2009 Oct;41(10):1116-21.
INSC	rs11605083 x rs7679673	11p15.2 x 4q24	4e-06	GWASTABLE	22219177	Tao S	2012-01-04	Carcinogenesis
IRS2	rs75823044	13q34	6e-12	GWASTABLE	29117387	Conti DV	2017-08-01	J Natl Cancer Inst
IRS2	rs7986346	13q34	<0.04	literature	22844442	Huang SP, Bao BY, Hour TC, Huang CY, Yu CC, Liu CC, Lee YC, Huang CN, Pao JB, Huang CH. Genetic variants in CASP3, BMP5, and IRS2 genes may influence survival in prostate cancer patients receiving androgen-deprivation therapy. PLoS One. 2012;7(7):e41219.
IRX4	rs12653946	5p15.33	3.9x10-18	literature	20676098	Takata R, Akamatsu S, Kubo M, Takahashi A et al. Genome-wide association study identifies five new susceptibility loci for prostate cancer in the Japanese population. Nat Genet. 2010 Sep;42(9):751-4.
IRX4	rs12653946	5p15.33	2e-12	GWASTABLE	26443449	Wang M	2015-10-07	Nat Commun
ITGA6	rs126212278	2q31.1	0.001	literature	21390317	Lindstrom S, Schumacher F, Siddiq A, Travis RC, Campa D, et al. Characterizing associations and SNP-environment interactions for GWAS-identified prostate cancer risk markers--results from BPC3. PLoS One. 2011 Feb 24;6(2):e17142.
ITGA6	rs126212278	2q31.1	0.02	literature	21756274	Liu F, Hsing AW, Wang X, Shao Q, Qi J, Ye Y, Wang Z, Chen H, Gao X, et al. Systematic confirmation study of reported prostate cancer risk-associated single nucleotide polymorphisms in Chinese men. Cancer Sci. 2011 Oct;102(10):1916-20.
ITGA6	rs12621278	2q31.1	6.18x10-1	literature	19767753	Eeles RA, Kote-Jarai Z, Al Olama AA, Giles GG, Guy M, Severi G, Muir K. et al. Identification of seven new prostate cancer susceptibility loci through a genome-wide association study. Nat Genet. 2009 Oct;41(10):1116-21.
ITGA6	rs12621278	2q31.1	0.03	literature	21637779	Haiman CA, Chen GK, Blot WJ, Strom SS, Berndt SI, Kittles RA. Et al. Characterizing genetic risk at known prostate cancer susceptibility loci in African Americans. PLoS Genet. 2011 May;7(5):e1001387.
ITGA6	rs12621278	2q31.1	3.36x10-19	literature	20564319	Kim ST, Cheng Y, Hsu FC, Jin T, Kader AK, Zheng SL, Isaacs WB, Xu J, Sun J. Prostate cancer risk-associated variants reported from genome-wide association studies: meta-analysis and their contribution to genetic Variation. Prostate. 2010 Dec 1;70(16):1729-38.
ITGA6	rs12621278	2q31.1	9e-23	nggri	20676098	Takata R, Akamatsu S, Kubo M, Genome-wide association study identifies five new susceptibility loci for prostate cancer in the Japanese population. 2010 Sep;42(9):751-4.
JAK2	rs10429491	9p24	0.002	literature	22542949	Kwon EM, Holt SK, Fu R, Kolb S, Williams G, Stanford JL, Ostrander EA. Androgen metabolism and JAK/STAT pathway genes and prostate cancer risk. Cancer Epidemiol. 2012 Aug;36(4):347-53.
JAZF1	rs104865567	7p15.2-p15.1	7.87x10-2	literature	18264096	Thomas G, Jacobs KB, Yeager M, Kraft P, Wacholder S, Orr N, Yu K, Chatterjee N, et al. Multiple loci identified in a genome-wide association study of prostate cancer. Nat Genet. 2008 Mar;40(3):310-5.
JAZF1	rs10486567	7p15.2-p15.1	0.04	literature	20450899	Bao BY, Pao JB, Lin VC, Huang CN, Chang TY. Et al. Individual and cumulative association of prostate cancer susceptibility variants with clinicopathologic characteristics of the disease. Clin Chim Acta. 2010 Sep 6;411(17-18):1232-7.
JAZF1	rs10486567	7p15.2-p15.1	0.0002	literature	21071540	Chang BL, Spangler E, Gallagher S, Haiman CA, Henderson B, Isaacs W. et al. Validation of genome-wide prostate cancer associations in men of African descent. Cancer Epidemiol Biomarkers Prev. 2011 Jan;20(1):23-32.
JAZF1	rs10486567	7p15.2-p15.1	2.21x10-7	literature	21372204	Ciampa J, Yeager M, Amundadottir L, Jacobs K, Kraft P, Chung C, et al. Large-scale exploration of gene-gene interactions in prostate cancer using a multistage genome-wide association study. Cancer Res. 2011 May 1;71(9):3287-95.
JAZF1	rs10486567	7p15.2-p15.1	2.83x10-4	literature	21960693	Feng J, Sun J, Kim ST, Lu Y, Wang Z, Zhang Z, Gronberg H, Isaacs WB, Zheng SL, Xu J. A genome-wide survey over the ChIP-on-chip identified androgen receptor-binding genomic regions identifies a novel prostate cancer susceptibility locus at 12q13.13. Cancer Epidemiol Biomarkers Prev. 2011 Nov;20(11):2396-403.
JAZF1	rs10486567	7p15.2-p15.1	8.9x10-4	literature	19366831	Fitzgerald LM, Kwon EM, Koopmeiners JS, Salinas CA, Stanford JL, Ostrander EA. Analysis of recently identified prostate cancer susceptibility loci in a population-based study: associations with family history and clinical features. Clin Cancer Res. 2009 May 1;15(9):3231-7.
JAZF1	rs10486567	7p15.2-p15.1	0.0007	literature	20460480	Gallagher DJ, Vijai J, Cronin AM, Bhatia J, Vickers AJ. Et al. Susceptibility loci associated with prostate cancer progression and mortality. Clin Cancer Res. 2010 May 15;16(10):2819-32.
JAZF1	rs10486567	7p15.2-p15.1	4.4x10-3	literature	19767754	Gudmundsson J, Sulem P, Gudbjartsson DF, Blondal T, Gylfason A, Agnarsson BA. Et al. Genome-wide association and replication studies identify four variants associated with prostate cancer susceptibility. Nat Genet. 2009 Oct;41(10):1122-6.
JAZF1	rs10486567	7p15.2-p15.1	2.9x10-4	literature	21637779	Haiman CA, Chen GK, Blot WJ, Strom SS, Berndt SI, Kittles RA. Et al. Characterizing genetic risk at known prostate cancer susceptibility loci in African Americans. PLoS Genet. 2011 May;7(5):e1001387.
JAZF1	rs10486567	7p15.2-p15.1	7.05x10-14	literature	21390317	Lindstrom S, Schumacher F, Siddiq A, Travis RC, Campa D, et al. Characterizing associations and SNP-environment interactions for GWAS-identified prostate cancer risk markers--results from BPC3. PLoS One. 2011 Feb 24;6(2):e17142.
JAZF1	rs10486567	7p15.2-p15.1	0.001	literature	20690139	Liu H, Wang B, Han C. Meta-analysis of genome-wide and replication association studies on prostate cancer. Prostate. 2011 Feb 1;71(2):209-24.
JAZF1	rs10486567	7p15.2-p15.1	7.79x10-11	literature	20406958	Prokunina-Olsson L, Fu YP, Tang W, Jacobs KB, Hayes RB. et al. Refining the prostate cancer genetic association within the JAZF1 gene on chromosome 7p15.2. Cancer Epidemiol Biomarkers Prev. 2010 May;19(5):1349-55.
JAZF1	rs10486567	7p15.2-p15.1	2e-06	nggri	20676098	Takata R, Akamatsu S, Kubo M, Genome-wide association study identifies five new susceptibility loci for prostate cancer in the Japanese population. 2010 Sep;42(9):751-4.
JAZF1	rs10486567	7p15.2-p15.1	2.14x10-06	literature	18264096	Thomas G, Jacobs KB, Yeager M, Kraft P, Wacholder S, Orr N, Yu K, Chatterjee N, et al. Multiple loci identified in a genome-wide association study of prostate cancer. Nat Genet. 2008 Mar;40(3):310-5.
JAZF1	rs10486567	7p15.2-p15.1	2.15x10-4	literature	22459122	Tsilidis KK, Travis RC, Appleby PN, Allen NE, Lindstrom S, Schumacher FR, et al. Interactions between genome-wide significant genetic variants and circulating concentrations of insulin-like growth factor 1, sex hormones, and binding proteins in relation to prostate cancer risk in the National Cancer Institute Breast and Prostate Cancer Cohort Consortium. Am J Epidemiol. 2012 May 1;175(9):926-35.
JAZF1	rs10486567	7p15.2-p15.1	2.1x10-5	literature	19318432	Waters KM, Le Marchand L, Kolonel LN, Monroe KR, Stram DO, Henderson BE, Haiman CA. Generalizability of associations from prostate cancer genome-wide association studies in multiple populations. Cancer Epidemiol Biomarkers Prev. 2009 Apr;18(4):1285-9.
JAZF1	rs10486567	7p15.2-p15.1	3.0x10-4	literature	19116992	Wiklund F, Zheng SL, Sun J, Adami HO, Lilja H, Hsu FC, et al. Association of reported prostate cancer risk alleles with PSA levels among men without a diagnosis of prostate cancer. Prostate. 2009 Mar 1;69(4):419-27.
JAZF1	rs10486567	7p15.1	4e-19	GWASTABLE	28139693	Hoffmann TJ	2017-01-31	Nat Commun
JAZF1	rs1080784	7p15.2-p15.1	2.96x10-10	literature	20406958	Prokunina-Olsson L, Fu YP, Tang W, Jacobs KB, Hayes RB. et al. Refining the prostate cancer genetic association within the JAZF1 gene on chromosome 7p15.2. Cancer Epidemiol Biomarkers Prev. 2010 May;19(5):1349-55.
JAZF1	rs17156041	7p15.2-p15.1	3.19x10-4	literature	21960693	Feng J, Sun J, Kim ST, Lu Y, Wang Z, Zhang Z, Gronberg H, Isaacs WB, Zheng SL, Xu J. A genome-wide survey over the ChIP-on-chip identified androgen receptor-binding genomic regions identifies a novel prostate cancer susceptibility locus at 12q13.13. Cancer Epidemiol Biomarkers Prev. 2011 Nov;20(11):2396-403.
JAZF1	rs38504	7p15.2-p15.1	1.73x10-6	literature	20406958	Prokunina-Olsson L, Fu YP, Tang W, Jacobs KB, Hayes RB. et al. Refining the prostate cancer genetic association within the JAZF1 gene on chromosome 7p15.2. Cancer Epidemiol Biomarkers Prev. 2010 May;19(5):1349-55.
JAZF1	rs7808935	7p15.2-p15.1	2.6x10-4	literature	21637779	Haiman CA, Chen GK, Blot WJ, Strom SS, Berndt SI, Kittles RA. Et al. Characterizing genetic risk at known prostate cancer susceptibility loci in African Americans. PLoS Genet. 2011 May;7(5):e1001387.
JAZF1	rs864745	7p15.2-p15.1	0.03	literature	23193118	Machiela MJ, Lindstr≈m S, Allen NE, Haiman CA, Albanes D, Barricarte A, et al. Association of type 2 diabetes susceptibility variants with advanced prostate cancer risk in the Breast and Prostate Cancer Cohort Consortium. Am J Epidemiol. 2012 Dec 15;176(12):1121-9.
KCNN3	rs1218582	1q21.3	1.95x10-8	literature	23535732	Eeles RA, Olama AA, Benlloch S, Saunders EJ, Leongamornlert DA, Tymrakiewicz M, et al. Identification of 23 new prostate cancer susceptibility loci using the iCOGS custom genotyping array. Nat Genet. 2013 Apr;45(4):385-91.
KCNQ1	rs231362	11p15.5	0.01	literature	23193118	Machiela MJ, Lindstr≈m S, Allen NE, Haiman CA, Albanes D, Barricarte A, et al. Association of type 2 diabetes susceptibility variants with advanced prostate cancer risk in the Breast and Prostate Cancer Cohort Consortium. Am J Epidemiol. 2012 Dec 15;176(12):1121-9.
KCTD16	rs6580317	5q32	4.66x10-5	literature	19117981	Sun J, Zheng SL, Wiklund F, Isaacs SD, Li G, Wiley KE. Et al. Sequence variants at 22q13 are associated with prostate cancer risk. Cancer Res. 2009 Jan 1;69(1):10-5.
KIAA1211	rs629242	4q12	7.25x10-7	literature	18073375	Duggan D, Zheng SL, Knowlton M, Benitez D, Dimitrov L, Wiklund F, Robbins C. et al. Two genome-wide association studies of aggressive prostate cancer implicate putative prostate tumor suppressor gene DAB2IP. J Natl Cancer Inst. 2007 Dec 19;99(24):1836-44.
KIF13A	rs10456809	6p22.3 x 8q24.21	5e-06	GWASTABLE	22219177	Tao S	2012-01-04	Carcinogenesis
KLF4	rs817826	9q31.2	5e-14	GWASTABLE	23023329	Xu J	2012-09-30	Nat Genet
KLF5	rs9600079	13q22.1	1e-06	GWASTABLE	26443449	Wang M	2015-10-07	Nat Commun
KLK13	rs2736433	19q13.33	0.05	literature	21741862	Lose F, Batra J, O'Mara T, Fahey P, Marquart L, Eeles RA, Easton DF, et al. Common variation in Kallikrein genes KLK5, KLK6, KLK12, and KLK13 and risk of prostate cancer and tumor aggressiveness. Urol Oncol. 2011 Jul 7.
KLK15	rs2659056	19q13.4	2.7x10-4	literature	22132073	Batra J, Lose F, O'Mara T, Marquart L, Stephens C, Alexander K, Srinivasan S, Eeles RA, Easton DF, Al Olama AA, Kote-Jarai Z, Guy M, Muir K, Lophatananon A, Rahman AA, Neal DE, Hamdy FC, Donovan JL, Chambers S, Gardiner RA, Aitken J, Yaxley J, Kedda MA, Clements JA, Spurdle AB. Association between Prostinogen (KLK15) genetic variants and prostate cancer risk and aggressiveness in Australia and a …
KLK15	rs2659056	19q13.4	2.7x10-4	literature	22132074	Batra J, Lose F, O'Mara T, Marquart L, Stephens C, Alexander K, Srinivasan S, Eeles RA, Easton DF, Al Olama AA, Kote-Jarai Z, Guy M, Muir K, Lophatananon A, Rahman AA, Neal DE, Hamdy FC, Donovan JL, Chambers S, Gardiner RA, Aitken J, Yaxley J, Kedda MA, Clements JA, Spurdle AB. Association between Prostinogen (KLK15) genetic variants and prostate cancer risk and aggressiveness in Australia and a …
KLK15	rs2659056	19q13.4	0.01	literature	18264097	Eeles RA, Kote-Jarai Z, Giles GG, Olama AA, Guy M, Jugurnauth SK, Mulholland S, Leongamornlert DA, et al. Multiple newly identified loci associated with prostate cancer susceptibility. Nat Genet. 2008 Mar;40(3):316-21.
KLK15	rs2659056	19q13.4	0.001	literature	20690139	Liu H, Wang B, Han C. Meta-analysis of genome-wide and replication association studies on prostate cancer. Prostate. 2011 Feb 1;71(2):209-24.
KLK15	rs2659056	19q13.4	1.2x10-7	literature	19639606	Zhong H, Prentice RL. Correcting "winner's curse" in odds ratios from genomewide association findings for major complex human diseases. Genet Epidemiol. 2010 Jan;34(1):78-91.
KLK15	rs266849	19q13.4	8.04x10-1	literature	18264097	Eeles RA, Kote-Jarai Z, Giles GG, Olama AA, Guy M, Jugurnauth SK, Mulholland S, Leongamornlert DA, et al. Multiple newly identified loci associated with prostate cancer susceptibility. Nat Genet. 2008 Mar;40(3):316-21.
KLK15	rs266870	19q13.4	0.05	literature	22549899	Bensen JT, Xu Z, Smith GJ, Mohler JL, Fontham ET, Taylor JA. Genetic polymorphism and prostate cancer aggressiveness: a case-only study of 1,536 GWAS and candidate SNPs in African-Americans and European-Americans. Prostate. 2013 Jan;73(1):11-22.
KLK2	rs1354774	19q13.33	6e-20	GWASTABLE	23359319	Jin G	2013-01-01	Neoplasia
KLK2	rs2735839	19q13.33	0.005	literature	22549899	Bensen JT, Xu Z, Smith GJ, Mohler JL, Fontham ET, Taylor JA. Genetic polymorphism and prostate cancer aggressiveness: a case-only study of 1,536 GWAS and candidate SNPs in African-Americans and European-Americans. Prostate. 2013 Jan;73(1):11-22.
KLK2	rs2735839	19q13.33	5.38x10-2	literature	21372204	Ciampa J, Yeager M, Amundadottir L, Jacobs K, Kraft P, Chung C, et al. Large-scale exploration of gene-gene interactions in prostate cancer using a multistage genome-wide association study. Cancer Res. 2011 May 1;71(9):3287-95.
KLK2	rs2735839	19q13.33	0.04	literature	18264097	Eeles RA, Kote-Jarai Z, Giles GG, Olama AA, Guy M, Jugurnauth SK, Mulholland S, Leongamornlert DA, et al. Multiple newly identified loci associated with prostate cancer susceptibility. Nat Genet. 2008 Mar;40(3):316-21.
KLK2	rs2735839	19q13.33	0.009	literature	20690139	Liu H, Wang B, Han C. Meta-analysis of genome-wide and replication association studies on prostate cancer. Prostate. 2011 Feb 1;71(2):209-24.
KLK2	RS2735839?	19q13.33	0.04	literature	19902474	Hooker S, Hernandez W, Chen H, Robbins C, Torres JB, Ahaghotu C, Carpten J, Kittles RA. Replication of prostate cancer risk loci on 8q24, 11q13, 17q12, 19q33, and Xp11 in African Americans. Prostate. 2010 Feb 15;70(3):270-5.
KLK2	rs2739472	19q13.33	8e-10	GWASTABLE	28139693	Hoffmann TJ	2017-01-31	Nat Commun
KLK2	rs6070	19q13.33	4e-16	GWASTABLE	28139693	Hoffmann TJ	2017-01-31	Nat Commun
KLK3	rs1058205	19q13.41	0.004	literature	22549899	Bensen JT, Xu Z, Smith GJ, Mohler JL, Fontham ET, Taylor JA. Genetic polymorphism and prostate cancer aggressiveness: a case-only study of 1,536 GWAS and candidate SNPs in African-Americans and European-Americans. Prostate. 2013 Jan;73(1):11-22.
KLK3	rs1058205	19q13.41	2.8x10-23	literature	21465221	Kote-Jarai Z, Amin Al Olama A, Leongamornlert D, Tymrakiewicz M, et al. Identification of a novel prostate cancer susceptibility variant in the KLK3 gene transcript. Hum Genet. 2011 Jun;129(6):687-94.
KLK3	rs1058205	19q13.41	0.04	literature	22542949	Kwon EM, Holt SK, Fu R, Kolb S, Williams G, Stanford JL, Ostrander EA. Androgen metabolism and JAK/STAT pathway genes and prostate cancer risk. Cancer Epidemiol. 2012 Aug;36(4):347-53.
KLK3	rs1058205	19q13.33	8e-21	GWASTABLE	24919509	Terao C	2014-06-11	J Med Genet
KLK3	rs11665748	19q13.41	3e-54	GWAS Database	28139693	Hoffmann TJ et al 2016
KLK3	rs174776	19q13.41	0.01	literature	22542949	Kwon EM, Holt SK, Fu R, Kolb S, Williams G, Stanford JL, Ostrander EA. Androgen metabolism and JAK/STAT pathway genes and prostate cancer risk. Cancer Epidemiol. 2012 Aug;36(4):347-53.
KLK3	rs17632542	19q13.41	3x10-10	literature	21160077	Gudmundsson J, Besenbacher S, Sulem P, Gudbjartsson DF, Olafsson I, et al. Genetic correction of PSA values using sequence variants associated with PSA levels. Sci Transl Med. 2010 Dec 15;2(62):62ra92.
KLK3	rs17632542	19q13.41	2E-340	GWAS Database	28139693	Hoffmann TJ et al 2016
KLK3	rs17632542	19q13.41	1.6x10-24	literature	21465221	Kote-Jarai Z, Amin Al Olama A, Leongamornlert D, Tymrakiewicz M, et al. Identification of a novel prostate cancer susceptibility variant in the KLK3 gene transcript. Hum Genet. 2011 Jun;129(6):687-94.
KLK3	rs17632542	19q13.33	2e-28	GWASTABLE	24753544	Knipe DW	2014-04-21	Cancer Epidemiol Biomarkers Prev
KLK3	rs17632542	19q13.33	1e-07	GWASTABLE	24740154	Lange EM	2014-04-16	PLoS One
KLK3	rs2659051	19q13.41	9e-21	GWAS Database	25434496	Kim S et al. 2014
KLK3	RS2659056	19q13.41	0.001	literature	21756274	Liu F, Hsing AW, Wang X, Shao Q, Qi J, Ye Y, Wang Z, Chen H, Gao X, et al. Systematic confirmation study of reported prostate cancer risk-associated single nucleotide polymorphisms in Chinese men. Cancer Sci. 2011 Oct;102(10):1916-20.
KLK3	rs2659124	19q13.33	1e-13	GWASTABLE	26034056	Hoffmann TJ	2015-06-01	Cancer Discov
KLK3	rs266849	19q13.41	8.04x10-1	literature	18264097	Eeles RA, Kote-Jarai Z, Giles GG, Olama AA, Guy M, Jugurnauth SK, Mulholland S, Leongamornlert DA, et al. Multiple newly identified loci associated with prostate cancer susceptibility. Nat Genet. 2008 Mar;40(3):316-21.
KLK3	rs266849	19q13.41	4e-17	GWAS Database	28139693	Hoffmann TJ et al 2016
KLK3	rs266849	19q13.41	1.4x10-14	literature	21465221	Kote-Jarai Z, Amin Al Olama A, Leongamornlert D, Tymrakiewicz M, et al. Identification of a novel prostate cancer susceptibility variant in the KLK3 gene transcript. Hum Genet. 2011 Jun;129(6):687-94.
KLK3	rs266849	19q13.41	0.008	literature	21390317	Lindstrom S, Schumacher F, Siddiq A, Travis RC, Campa D, et al. Characterizing associations and SNP-environment interactions for GWAS-identified prostate cancer risk markers--results from BPC3. PLoS One. 2011 Feb 24;6(2):e17142.
KLK3	rs266868	19q13.41	1e-14	GWAS Database	28139693	Hoffmann TJ et al 2016
KLK3	rs266877	19q13.41	0.02	literature	21421545	Penney KL, Schumacher FR, Kraft P, Mucci LA, Sesso HD, Ma J, Niu Y, Cheong JK, Hunter DJ, Stampfer MJ, Hsu SI. Association of KLK3 (PSA) genetic variants with prostate cancer risk and PSA levels. Carcinogenesis. 2011 Jun;32(6):853-9.
KLK3	rs2735839	19q13.41	1.5x10-18	literature	18264097	Eeles RA, Kote-Jarai Z, Giles GG, Olama AA, Guy M, Jugurnauth SK, Mulholland S, Leongamornlert DA, et al. Multiple newly identified loci associated with prostate cancer susceptibility. Nat Genet. 2008 Mar;40(3):316-21.
KLK3	rs2735839	19q13.41	0.04	literature	19366831	Fitzgerald LM, Kwon EM, Koopmeiners JS, Salinas CA, Stanford JL, Ostrander EA. Analysis of recently identified prostate cancer susceptibility loci in a population-based study: associations with family history and clinical features. Clin Cancer Res. 2009 May 1;15(9):3231-7.
KLK3	rs2735839	19q13.41	0.007	literature	20460480	Gallagher DJ, Vijai J, Cronin AM, Bhatia J, Vickers AJ. Et al. Susceptibility loci associated with prostate cancer progression and mortality. Clin Cancer Res. 2010 May 15;16(10):2819-32.
KLK3	rs2735839	19q13.41	0.02	literature	19767754	Gudmundsson J, Sulem P, Gudbjartsson DF, Blondal T, Gylfason A, Agnarsson BA. Et al. Genome-wide association and replication studies identify four variants associated with prostate cancer susceptibility. Nat Genet. 2009 Oct;41(10):1122-6.
KLK3	rs2735839	19q13.41	0.04	literature	19902474	Hooker S, Hernandez W, Chen H, Robbins C, Torres JB, Ahaghotu C, Carpten J, Kittles RA. Replication of prostate cancer risk loci on 8q24, 11q13, 17q12, 19q33, and Xp11 in African Americans. Prostate. 2010 Feb 15;70(3):270-5.
KLK3	rs2735839	19q13.41	8.4x10-7	literature	19434657	Kader AK, Sun J, Isaacs SD, Wiley KE, Yan G, Kim ST, Fedor H, DeMarzo AM, et al. Individual and cumulative effect of prostate cancer risk-associated variants on clinicopathologic variables in 5,895 prostate cancer patients. Prostate. 2009 Aug 1;69(11):1195-205.
KLK3	rs2735839	19q13.41	7.47x10-4	literature	20564319	Kim ST, Cheng Y, Hsu FC, Jin T, Kader AK, Zheng SL, Isaacs WB, Xu J, Sun J. Prostate cancer risk-associated variants reported from genome-wide association studies: meta-analysis and their contribution to genetic Variation. Prostate. 2010 Dec 1;70(16):1729-38.
KLK3	rs2735839	19q13.41	1.1x10-22	literature	21465221	Kote-Jarai Z, Amin Al Olama A, Leongamornlert D, Tymrakiewicz M, et al. Identification of a novel prostate cancer susceptibility variant in the KLK3 gene transcript. Hum Genet. 2011 Jun;129(6):687-94.
KLK3	rs2735839	19q13.41	0.0007	literature	18708398	Kote-Jarai Z, Easton DF, Stanford JL, Ostrander EA, Schleutker J, Ingles SA, et al. Multiple novel prostate cancer predisposition loci confirmed by an international study: the PRACTICAL Consortium. Cancer Epidemiol Biomarkers Prev. 2008 Aug;17(8):2052-61.
KLK3	rs2735839	19q13.41	3.05x10-6	literature	21390317	Lindstrom S, Schumacher F, Siddiq A, Travis RC, Campa D, et al. Characterizing associations and SNP-environment interactions for GWAS-identified prostate cancer risk markers--results from BPC3. PLoS One. 2011 Feb 24;6(2):e17142.
KLK3	rs2735839	19q13.41	6.45x10-37	literature	23269536	Sun J, Tao S, Gao Y, Peng T, Tan A, Zhang H, Yang X, Qin X, Hu Y, et al. Genome-wide association study identified novel genetic variant on SLC45A3 gene associated with serum levels prostate-specific antigen (PSA) in a Chinese population. Hum Genet. 2013 Apr;132(4):423-9.
KLK3	rs2735839	19q13.41	0.05	literature	22459122	Tsilidis KK, Travis RC, Appleby PN, Allen NE, Lindstrom S, Schumacher FR, et al. Interactions between genome-wide significant genetic variants and circulating concentrations of insulin-like growth factor 1, sex hormones, and binding proteins in relation to prostate cancer risk in the National Cancer Institute Breast and Prostate Cancer Cohort Consortium. Am J Epidemiol. 2012 May 1;175(9):926-35.
KLK3	rs2735839	19q13.41	0.05	literature	19116992	Wiklund F, Zheng SL, Sun J, Adami HO, Lilja H, Hsu FC, et al. Association of reported prostate cancer risk alleles with PSA levels among men without a diagnosis of prostate cancer. Prostate. 2009 Mar 1;69(4):419-27.
KLK3	rs2735839	19q13.41	0.01	literature	21456070	Xu Z, Bensen JT, Smith GJ, Mohler JL, Taylor JA. GWAS SNP Replication among African American and European American men in the North Carolina-Louisiana prostate cancer project (PCaP). Prostate. 2011 Jun 1;71(8):881-91.
KLK3	rs2735839	19q13.41	2.4x10-20	literature	19639606	Zhong H, Prentice RL. Correcting "winner's curse" in odds ratios from genomewide association findings for major complex human diseases. Genet Epidemiol. 2010 Jan;34(1):78-91.
KLK3	rs2739472; rs6070; rs11665748; rs17632542; rs266849; rs266868; rs61752561	19q13.41	9e-186	GWAS Database	28139693	Hoffmann TJ et al 2016
KLK3	rs3760722	19q13.41	1.5x10-3	literature	21637779	Haiman CA, Chen GK, Blot WJ, Strom SS, Berndt SI, Kittles RA. Et al. Characterizing genetic risk at known prostate cancer susceptibility loci in African Americans. PLoS Genet. 2011 May;7(5):e1001387.
KLK3	rs61752561	19q13.41	0.0005	literature	20460480	Gallagher DJ, Vijai J, Cronin AM, Bhatia J, Vickers AJ. Et al. Susceptibility loci associated with prostate cancer progression and mortality. Clin Cancer Res. 2010 May 15;16(10):2819-32.
KLK3	rs61752561	19q13.41	2e-25	GWAS Database	28139693	Hoffmann TJ et al 2016
KLK3	rs62113212	19q13.33	6e-09	GWASTABLE	25939597	Berndt SI	2015-05-05	Nat Commun
KLK5	rs268908	19q13.33	0.001	literature	21741862	Lose F, Batra J, O'Mara T, Fahey P, Marquart L, Eeles RA, Easton DF, et al. Common variation in Kallikrein genes KLK5, KLK6, KLK12, and KLK13 and risk of prostate cancer and tumor aggressiveness. Urol Oncol. 2011 Jul 7.
KRT8	rs4919743	12q13.13	3.64x10-4	literature	21960693	Feng J, Sun J, Kim ST, Lu Y, Wang Z, Zhang Z, Gronberg H, Isaacs WB, Zheng SL, Xu J. A genome-wide survey over the ChIP-on-chip identified androgen receptor-binding genomic regions identifies a novel prostate cancer susceptibility locus at 12q13.13. Cancer Epidemiol Biomarkers Prev. 2011 Nov;20(11):2396-403.
KRT8	rs902774	12q13.13	0.003	literature	21743057	Schumacher FR, Berndt SI, Siddiq A, Jacobs KB. Et al. Genome-wide association study identifies new prostate cancer susceptibility loci. Hum Mol Genet. 2011 Oct 1;20(19):3867-75.
LACE1	rs2273669	6q21	8e-09	GWASTABLE	23535732	Eeles RA	2013-04-01	Nat Genet
LILRA3	rs103294	19q13.4	5.34x10-16	literature	23023329	Xu J, Mo Z, Ye D, Wang M, Liu F, Jin G, Xu C, Wang X, et al. Genome-wide association study in Chinese men identifies two new prostate cancer risk loci at 9q31.2 and 19q13.4. Nat Genet. 2012 Nov;44(11):1231-5.
LINC00506	rs17023900	3p12.1	1e-11	GWASTABLE	25939597	Berndt SI	2015-05-05	Nat Commun
LMO4	rs6662386	1p22.3	7e-20	GWASTABLE	28139693	Hoffmann TJ	2017-01-31	Nat Commun
LMTK2	rs6465657	7q22.1	0.007	literature	20450899	Bao BY, Pao JB, Lin VC, Huang CN, Chang TY. Et al. Individual and cumulative association of prostate cancer susceptibility variants with clinicopathologic characteristics of the disease. Clin Chim Acta. 2010 Sep 6;411(17-18):1232-7.
LMTK2	rs6465657	7q22.1	1.1x10-9	literature	18264097	Eeles RA, Kote-Jarai Z, Giles GG, Olama AA, Guy M, Jugurnauth SK, Mulholland S, Leongamornlert DA, et al. Multiple newly identified loci associated with prostate cancer susceptibility. Nat Genet. 2008 Mar;40(3):316-21.
LMTK2	rs6465657	7q22.1	7.9x10-3	literature	19366831	Fitzgerald LM, Kwon EM, Koopmeiners JS, Salinas CA, Stanford JL, Ostrander EA. Analysis of recently identified prostate cancer susceptibility loci in a population-based study: associations with family history and clinical features. Clin Cancer Res. 2009 May 1;15(9):3231-7.
LMTK2	rs6465657	7q22.1	1.42x10-3	literature	20564319	Kim ST, Cheng Y, Hsu FC, Jin T, Kader AK, Zheng SL, Isaacs WB, Xu J, Sun J. Prostate cancer risk-associated variants reported from genome-wide association studies: meta-analysis and their contribution to genetic Variation. Prostate. 2010 Dec 1;70(16):1729-38.
LMTK2	rs6465657	7q22.1	7x10-6	literature	18708398	Kote-Jarai Z, Easton DF, Stanford JL, Ostrander EA, Schleutker J, Ingles SA, et al. Multiple novel prostate cancer predisposition loci confirmed by an international study: the PRACTICAL Consortium. Cancer Epidemiol Biomarkers Prev. 2008 Aug;17(8):2052-61.
LMTK2	rs6465657	7q22.1	1.52x10-7	literature	21390317	Lindstrom S, Schumacher F, Siddiq A, Travis RC, Campa D, et al. Characterizing associations and SNP-environment interactions for GWAS-identified prostate cancer risk markers--results from BPC3. PLoS One. 2011 Feb 24;6(2):e17142.
LMTK2	rs6465657	7q22.1	2e-08	nggri	20676098	Takata R, Akamatsu S, Kubo M, Genome-wide association study identifies five new susceptibility loci for prostate cancer in the Japanese population. 2010 Sep;42(9):751-4.
LMTK2	rs6465657	7q22.1	0.02	literature	22459122	Tsilidis KK, Travis RC, Appleby PN, Allen NE, Lindstrom S, Schumacher FR, et al. Interactions between genome-wide significant genetic variants and circulating concentrations of insulin-like growth factor 1, sex hormones, and binding proteins in relation to prostate cancer risk in the National Cancer Institute Breast and Prostate Cancer Cohort Consortium. Am J Epidemiol. 2012 May 1;175(9):926-35.
LMTK2	rs6465657	7q22.1	0.02	literature	21829199	Vijai J, Kirchhoff T, Gallagher D, Hamel N, Guha S, Darvasi A, et al. Genetic architecture of prostate cancer in the Ashkenazi Jewish population. Br J Cancer. 2011 Sep 6;105(6):864-9.
LMTK2	rs6465657	7q22.1	1.2x10-8	literature	19639606	Zhong H, Prentice RL. Correcting "winner's curse" in odds ratios from genomewide association findings for major complex human diseases. Genet Epidemiol. 2010 Jan;34(1):78-91.
LOC100505495	rs887391	19	3.2x10-7	literature	19318370	Hsu FC, Sun J, Wiklund F, Isaacs SD, Wiley KE, et al. A novel prostate cancer susceptibility locus at 19q13. Cancer Res. 2009 Apr 1;69(7):2720-3.
LOC100505495	rs887391	19	6.86x10-7	literature	20564319	Kim ST, Cheng Y, Hsu FC, Jin T, Kader AK, Zheng SL, Isaacs WB, Xu J, Sun J. Prostate cancer risk-associated variants reported from genome-wide association studies: meta-analysis and their contribution to genetic Variation. Prostate. 2010 Dec 1;70(16):1729-38.
LOC285232	rs2660753	3p12.1	4.88x10-1	literature	18264097	Eeles RA, Kote-Jarai Z, Giles GG, Olama AA, Guy M, Jugurnauth SK, Mulholland S, Leongamornlert DA, et al. Multiple newly identified loci associated with prostate cancer susceptibility. Nat Genet. 2008 Mar;40(3):316-21.
LOC285830	rs2523395	6p22.1 x 8p21.2	2e-06	GWASTABLE	22219177	Tao S	2012-01-04	Carcinogenesis
LOC338694	rs7929962	11q13.3	2e-13	GWASTABLE	25939597	Berndt SI	2015-05-05	Nat Commun
LOC340602	rs5945572	Xp11.22	4e-13	GWASTABLE	18264098	Gudmundsson J	2008-02-10	Nat Genet
LOC63930	rs6089829	20q13.33 x 19q13.33	3e-06	GWASTABLE	22219177	Tao S	2012-01-04	Carcinogenesis
LOC727677	rs13282506	8q24.21	3.8x10-4	literature	21637779	Haiman CA, Chen GK, Blot WJ, Strom SS, Berndt SI, Kittles RA. Et al. Characterizing genetic risk at known prostate cancer susceptibility loci in African Americans. PLoS Genet. 2011 May;7(5):e1001387.
LOC727677	rs1447295	8q24.21	0.01	literature	16682969	Amundadottir LT, Sulem P, Gudmundsson J, Helgason A, Baker A. et al. A common variant associated with prostate cancer in European and African populations. Nat Genet. 2006 Jun;38(6):652-8.
LOC727677	rs1447295	8q24.21	0.01	literature	20450899	Bao BY, Pao JB, Lin VC, Huang CN, Chang TY. Et al. Individual and cumulative association of prostate cancer susceptibility variants with clinicopathologic characteristics of the disease. Clin Chim Acta. 2010 Sep 6;411(17-18):1232-7.
LOC727677	rs1447295	8q24.21	2.9x10-4	literature	19567509	Breyer JP, McReynolds KM, Yaspan BL, Bradley KM, Dupont WD, Smith JR. Genetic variants and prostate cancer risk: candidate replication and exploration of viral restriction genes. Cancer Epidemiol Biomarkers Prev. 2009 Jul;18(7):2137-44.
LOC727677	rs1447295	8q24.21	2.2x10-19	literature	19767754	Gudmundsson J, Sulem P, Gudbjartsson DF, Blondal T, Gylfason A, Agnarsson BA. Et al. Genome-wide association and replication studies identify four variants associated with prostate cancer susceptibility. Nat Genet. 2009 Oct;41(10):1122-6.
LOC727677	rs1447295	8q24.21	6.4x10-18	literature	17603485	Gudmundsson J, Sulem P, Steinthorsdottir V, Bergthorsson JT, Thorleifsson G, Manolescu A, Rafnar T, et al. Two variants on chromosome 17 confer prostate cancer risk, and the one in TCF2 protects against type 2 diabetes. Nat Genet. 2007 Aug;39(8):977-83. Epub 2007 Jul 1.
LOC727677	rs1447295	8q24.21	0.03	literature	19900942	Huang SP, Huang LC, Ting WC, Chen LM, Chang TY, Lu TL, Lan YH, Liu CC, Yang WH, Lee HZ, Hsieh CJ, Bao BY. Prognostic significance of prostate cancer susceptibility variants on prostate-specific antigen recurrence after radical prostatectomy. Cancer Epidemiol Biomarkers Prev. 2009 Nov;18(11):3068-74.
LOC727677	rs1447295	8q24.21	3.82x10-14	literature	20564319	Kim ST, Cheng Y, Hsu FC, Jin T, Kader AK, Zheng SL, Isaacs WB, Xu J, Sun J. Prostate cancer risk-associated variants reported from genome-wide association studies: meta-analysis and their contribution to genetic Variation. Prostate. 2010 Dec 1;70(16):1729-38.
LOC727677	rs1447295	8q24.21	0.04	literature	20978189	Koutros S, Beane Freeman LE, Berndt SI, Andreotti G, Lubin JH, Sandler DP. Et al. Pesticide use modifies the association between genetic variants on chromosome 8q24 and prostate cancer. Cancer Res. 2010 Nov 15;70(22):9224-33.
LOC727677	rs1447295	8q24.21	0.008	literature	22099997	Liu M, Wang J, Xu Y, Wei D, Shi X, Yang Z. Risk loci on chromosome 8q24 are associated with prostate cancer in northern Chinese men. J Urol. 2012 Jan;187(1):315-21.
LOC727677	rs1447295	8q24.21	0.004	literature	22077888	McGuire BB, Helfand BT, Kundu S, Hu Q, Banks JA, Cooper P, Catalona WJ. Association of prostate cancer risk alleles with unfavourable pathological characteristics in potential candidates for active surveillance. BJU Int. 2012 Aug;110(3):338-43.
LOC727677	rs1447295	8q24.21	0.01	literature	18625567	Meyer A, Sch?rmann P, Ghahremani M, Kocak E, Brinkhaus MJ, Bremer M, Karstens JH, Hagemann J, Machtens S, D≈rk T. Association of chromosomal locus 8q24 and risk of prostate cancer: a hospital-based study of German patients treated with brachytherapy. Urol Oncol. 2009 Jul-Aug;27(4):373-6.
LOC727677	rs1447295	8q24.21	2.5x10-5	literature	21557270	Okobia MN, Zmuda JM, Ferrell RE, Patrick AL, Bunker CH. Chromosome 8q24 variants are associated with prostate cancer risk in a high risk population of African ancestry. Prostate. 2011 Jul;71(10):1054-63.
LOC727677	rs1447295	8q24.21	0.001	literature	18483343	Salinas CA, Kwon E, Carlson CS, Koopmeiners JS, et al. Multiple independent genetic variants in the 8q24 region are associated with prostate cancer risk. Cancer Epidemiol Biomarkers Prev. 2008 May;17(5):1203-13.
LOC727677	rs1447295	8q24.21	0.008	literature	19726753	Yamada H, Penney KL, Takahashi H, Katoh T, Yamano Y, et al. Replication of prostate cancer risk loci in a Japanese case-control association study. J Natl Cancer Inst. 2009 Oct 7;101(19):1330-6.
LOC727677	rs1447295	8q24.21	1.53x10-14	literature	17401363	Yeager M, Orr N, Hayes RB, Jacobs KB, Kraft P, Wacholder S, et al. Genome-wide association study of prostate cancer identifies a second risk locus at 8q24. Nat Genet. 2007 May;39(5):645-9.
LOC727677	rs1447295	8q24.21	4e-23	GWASTABLE	26443449	Wang M	2015-10-07	Nat Commun
LOC727677	rs4242382	8q24.21	1e-34	GWASTABLE	25939597	Berndt SI	2015-05-05	Nat Commun
LOC727677	rs6470517	8q24.21	7.6x10-4	literature	19562729	Pal P, Xi H, Guha S, Sun G, Helfand BT, Meeks JJ, Suarez BK, Catalona WJ, Deka R. Common variants in 8q24 are associated with risk for prostate cancer and tumor aggressiveness in men of European ancestry. Prostate. 2009 Oct 1;69(14):1548-56.
LOC729852	rs13225697	7p21.3	0.008	literature	17876339	Nam RK, Zhang WW, Loblaw DA, Klotz LH, Trachtenberg J, Jewett MA, et al. A genome-wide association screen identifies regions on chromosomes 1q25 and 7p21 as risk loci for sporadic prostate cancer. Prostate Cancer Prostatic Dis. 2008;11(3):241-6.
LOC729852	rs2348763	7p21.3	0.01	literature	17876339	Nam RK, Zhang WW, Loblaw DA, Klotz LH, Trachtenberg J, Jewett MA, et al. A genome-wide association screen identifies regions on chromosomes 1q25 and 7p21 as risk loci for sporadic prostate cancer. Prostate Cancer Prostatic Dis. 2008;11(3):241-6.
LRP1B	rs10210358	2q21.2	2e-06	erdisfanct/nggri	20932654	Kerns SL, Ostrer H, Stock R, Genome-wide association study to identify single nucleotide polymorphisms (SNPs) associated with the development of erectile dysfunction in African-American men after radiotherapy for prostate cancer. 2010 Dec 1;78(5):1292-300.
LRRN2	rs4245739	1q32.1	2e-11	GWASTABLE	23535732	Eeles RA	2013-04-01	Nat Genet
MAML3	rs736349	4q28	0.002	literature	18073375	Duggan D, Zheng SL, Knowlton M, Benitez D, Dimitrov L, Wiklund F, Robbins C. et al. Two genome-wide association studies of aggressive prostate cancer implicate putative prostate tumor suppressor gene DAB2IP. J Natl Cancer Inst. 2007 Dec 19;99(24):1836-44.
MDM4	rs4245739	1q32	2.01x10-11	literature	23535732	Eeles RA, Olama AA, Benlloch S, Saunders EJ, Leongamornlert DA, Tymrakiewicz M, et al. Identification of 23 new prostate cancer susceptibility loci using the iCOGS custom genotyping array. Nat Genet. 2013 Apr;45(4):385-91.
MIR4319 x EEFSEC	rs998124 x rs10934853	18q12.3 x 3q21.3	5e-06	GWASTABLE	22219177	Tao S	2012-01-04	Carcinogenesis
MIR622 x NKX3.1	rs16944141 x rs1512268	13q31.3 x 8p21.2	3e-06	GWASTABLE	22219177	Tao S	2012-01-04	Carcinogenesis
MIR656 x EEFSEC	rs2400997 x rs10934853	14q32.31 x 3q21.3	3e-06	GWASTABLE	22219177	Tao S	2012-01-04	Carcinogenesis
MLPH	rs2292884	2q37.2	4e-08	nggri	19767753	Eeles RA, Kote-Jarai Z, Al Olama AA, Identification of seven new prostate cancer susceptibility loci through a genome-wide association study. 2009 Oct;41(10):1116-21
MLPH	rs2292884	2q37.2	0.001	literature	21743467	Kote-Jarai Z, Olama AA, Giles GG, Severi G, Schleutker J, Weischer M, Campa D, et al. Seven prostate cancer susceptibility loci identified by a multi-stage genome-wide association study. Nat Genet. 2011 Jul 10;43(8):785-91.
MLPH	rs2292884	2q37.2	4.3x10-8	literature	21743057	Schumacher FR, Berndt SI, Siddiq A, Jacobs KB. Et al. Genome-wide association study identifies new prostate cancer susceptibility loci. Hum Mol Genet. 2011 Oct 1;20(19):3867-75.
MMP7	rs11568818	11q21-q22	1.56x10-11	literature	23535732	Eeles RA, Olama AA, Benlloch S, Saunders EJ, Leongamornlert DA, Tymrakiewicz M, et al. Identification of 23 new prostate cancer susceptibility loci using the iCOGS custom genotyping array. Nat Genet. 2013 Apr;45(4):385-91.
MMP7	rs12285347	11q22.2	8e-12	GWASTABLE	28139693	Hoffmann TJ	2017-01-31	Nat Commun
MMP8	rs11568818	11q22.2	2e-11	GWASTABLE	23535732	Eeles RA	2013-04-01	Nat Genet
MN1	rs6005451	22q12.1 x 8q24.21	4e-06	GWASTABLE	22219177	Tao S	2012-01-04	Carcinogenesis
MSMB	RS0993994	10q11.2	0.005-0.001, 8.7x10-29	literature	21071540	Chang BL, Spangler E, Gallagher S, Haiman CA, Henderson B, Isaacs W. et al. Validation of genome-wide prostate cancer associations in men of African descent. Cancer Epidemiol Biomarkers Prev. 2011 Jan;20(1):23-32.
MSMB	rs10993994	10q11.2	0.01	literature	21343373	Ahn J, Kibel AS, Park JY, Rebbeck TR, Rennert H, et al. Prostate cancer predisposition loci and risk of metastatic disease and prostate cancer recurrence. Clin Cancer Res. 2011 Mar 1;17(5):1075-81.
MSMB	rs10993994	10q11.2	0.01	literature	20450899	Bao BY, Pao JB, Lin VC, Huang CN, Chang TY. Et al. Individual and cumulative association of prostate cancer susceptibility variants with clinicopathologic characteristics of the disease. Clin Chim Acta. 2010 Sep 6;411(17-18):1232-7.
MSMB	rs10993994	10q11.2	0.02	literature	19336566	Camp NJ, Farnham JM, Wong J, Christensen GB, Thomas A, Cannon-Albright LA. Replication of the 10q11 and Xp11 prostate cancer risk variants: results from a Utah pedigree-based study. Cancer Epidemiol Biomarkers Prev. 2009 Apr;18(4):1290-4.
MSMB	rs10993994	10q11.2	7.7x10-15	literature	19153072	Chang BL, Cramer SD, Wiklund F, Isaacs SD, Stevens VL, et al. Fine mapping association study and functional analysis implicate a SNP in MSMB at 10q11 as a causal variant for prostate cancer risk. Hum Mol Genet. 2009 Apr 1;18(7):1368-75.
MSMB	rs10993994	10q11.2	0.005	literature	21071540	Chang BL, Spangler E, Gallagher S, Haiman CA, Henderson B, Isaacs W. et al. Validation of genome-wide prostate cancer associations in men of African descent. Cancer Epidemiol Biomarkers Prev. 2011 Jan;20(1):23-32.
MSMB	rs10993994	10q11.2	7.47x10-13	literature	21372204	Ciampa J, Yeager M, Amundadottir L, Jacobs K, Kraft P, Chung C, et al. Large-scale exploration of gene-gene interactions in prostate cancer using a multistage genome-wide association study. Cancer Res. 2011 May 1;71(9):3287-95.
MSMB	rs10993994	10q11.2	8.7x10-29	literature	18264097	Eeles RA, Kote-Jarai Z, Giles GG, Olama AA, Guy M, Jugurnauth SK, Mulholland S, Leongamornlert DA, et al. Multiple newly identified loci associated with prostate cancer susceptibility. Nat Genet. 2008 Mar;40(3):316-21.
MSMB	rs10993994	10q11.2	3.7x10-6	literature	19366831	Fitzgerald LM, Kwon EM, Koopmeiners JS, Salinas CA, Stanford JL, Ostrander EA. Analysis of recently identified prostate cancer susceptibility loci in a population-based study: associations with family history and clinical features. Clin Cancer Res. 2009 May 1;15(9):3231-7.
MSMB	rs10993994	10q11.2	3.5x10-6	literature	22887727	FitzGerald LM, Zhang X, Kolb S, Kwon EM, Liew YC, Hurtado-Coll A, Knudsen BS, Ostrander EA, Stanford JL. Investigation of the relationship between prostate cancer and MSMB and NCOA4 genetic variants and protein expression. Hum Mutat. 2013 Jan;34(1):149-56.
MSMB	rs10993994	10q11.2	3x10-10	literature	21160077	Gudmundsson J, Besenbacher S, Sulem P, Gudbjartsson DF, Olafsson I, et al. Genetic correction of PSA values using sequence variants associated with PSA levels. Sci Transl Med. 2010 Dec 15;2(62):62ra92.
MSMB	rs10993994	10q11.2	3.7x10-3	literature	19767754	Gudmundsson J, Sulem P, Gudbjartsson DF, Blondal T, Gylfason A, Agnarsson BA. Et al. Genome-wide association and replication studies identify four variants associated with prostate cancer susceptibility. Nat Genet. 2009 Oct;41(10):1122-6.
MSMB	rs10993994	10q11.2	0.01	literature	21637779	Haiman CA, Chen GK, Blot WJ, Strom SS, Berndt SI, Kittles RA. Et al. Characterizing genetic risk at known prostate cancer susceptibility loci in African Americans. PLoS Genet. 2011 May;7(5):e1001387.
MSMB	rs10993994	10q11.2	0.004	literature	19900942	Huang SP, Huang LC, Ting WC, Chen LM, Chang TY, Lu TL, Lan YH, Liu CC, Yang WH, Lee HZ, Hsieh CJ, Bao BY. Prognostic significance of prostate cancer susceptibility variants on prostate-specific antigen recurrence after radical prostatectomy. Cancer Epidemiol Biomarkers Prev. 2009 Nov;18(11):3068-74.
MSMB	rs10993994	10q11.2	6.70x10-5	literature	22198737	Jin G, Lu L, Cooney KA, Ray AM, Zuhlke KA, Lange EM, Cannon-Albright LA, Camp NJ, et al. 2012. Validation of prostate cancer risk-related loci identified from genome-wide association studies using family-based association analysis: evidence from the International Consortium for Prostate Cancer Genetics (ICPCG). Hum Genet. 2012 Jul;131(7):1095-103.
MSMB	rs10993994	10q11.2	6.80x10-5	literature	20564319	Kim ST, Cheng Y, Hsu FC, Jin T, Kader AK, Zheng SL, Isaacs WB, Xu J, Sun J. Prostate cancer risk-associated variants reported from genome-wide association studies: meta-analysis and their contribution to genetic Variation. Prostate. 2010 Dec 1;70(16):1729-38.
MSMB	rs10993994	10q11.2	1.0x10-17	literature	18708398	Kote-Jarai Z, Easton DF, Stanford JL, Ostrander EA, Schleutker J, Ingles SA, et al. Multiple novel prostate cancer predisposition loci confirmed by an international study: the PRACTICAL Consortium. Cancer Epidemiol Biomarkers Prev. 2008 Aug;17(8):2052-61.
MSMB	rs10993994	10q11.2	5.95x10-25	literature	21390317	Lindstrom S, Schumacher F, Siddiq A, Travis RC, Campa D, et al. Characterizing associations and SNP-environment interactions for GWAS-identified prostate cancer risk markers--results from BPC3. PLoS One. 2011 Feb 24;6(2):e17142.
MSMB	rs10993994	10q11.2	0.04	literature	21756274	Liu F, Hsing AW, Wang X, Shao Q, Qi J, Ye Y, Wang Z, Chen H, Gao X, et al. Systematic confirmation study of reported prostate cancer risk-associated single nucleotide polymorphisms in Chinese men. Cancer Sci. 2011 Oct;102(10):1916-20.
MSMB	rs10993994	10q11.2	0.001	literature	20690139	Liu H, Wang B, Han C. Meta-analysis of genome-wide and replication association studies on prostate cancer. Prostate. 2011 Feb 1;71(2):209-24.
MSMB	rs10993994	10q11.2	9.7x10-19	literature	19383797	Lou H, Yeager M, Li H, Bosquet JG, Hayes RB, Orr N, Yu K, et al. Fine mapping and functional analysis of a common variant in MSMB on chromosome 10q11.2 associated with prostate cancer susceptibility. Proc Natl Acad Sci U S A. 2009 May 12;106(19):7933-8.
MSMB	rs10993994	10q11.2	0.001	literature	22733159	Prostate Cancer Prostatic Dis. 2012 Dec;15(4):365-8. Analysis of prostate cancer association with four single-nucleotide polymorphisms from genome-wide studies and serum phyto-estrogen concentrations. Prostate Cancer Prostatic Dis. 2012 Dec;15(4):365-8.
MSMB	rs10993994	10q11.2	0.0003	literature	22677538	Rinckleb AE, Surowy HM, Luedeke M, Varga D, et al. The prostate cancer risk locus at 10q11 is associated with DNA repair capacity. DNA Repair (Amst). 2012 Aug 1;11(8):693-701.
MSMB	rs10993994	10q11.2	4.62-10-17	literature	23269536	Sun J, Tao S, Gao Y, Peng T, Tan A, Zhang H, Yang X, Qin X, Hu Y, et al. Genome-wide association study identified novel genetic variant on SLC45A3 gene associated with serum levels prostate-specific antigen (PSA) in a Chinese population. Hum Genet. 2013 Apr;132(4):423-9.
MSMB	rs10993994	10q11.2	7.31x10-13	literature	18264096	Thomas G, Jacobs KB, Yeager M, Kraft P, Wacholder S, Orr N, Yu K, Chatterjee N, et al. Multiple loci identified in a genome-wide association study of prostate cancer. Nat Genet. 2008 Mar;40(3):310-5.
MSMB	rs10993994	10q11.2	1e-50	GWAS Database	28139693	Thomas J Hoffman et al. 2016
MSMB	rs10993994	10q11.2	1.27x10-6	literature	22459122	Tsilidis KK, Travis RC, Appleby PN, Allen NE, Lindstrom S, Schumacher FR, et al. Interactions between genome-wide significant genetic variants and circulating concentrations of insulin-like growth factor 1, sex hormones, and binding proteins in relation to prostate cancer risk in the National Cancer Institute Breast and Prostate Cancer Cohort Consortium. Am J Epidemiol. 2012 May 1;175(9):926-35.
MSMB	rs10993994	10q11.2	0.02	literature	21829199	Vijai J, Kirchhoff T, Gallagher D, Hamel N, Guha S, Darvasi A, et al. Genetic architecture of prostate cancer in the Ashkenazi Jewish population. Br J Cancer. 2011 Sep 6;105(6):864-9.
MSMB	rs10993994	10q11.2	3.1x10-3	literature	19318432	Waters KM, Le Marchand L, Kolonel LN, Monroe KR, Stram DO, Henderson BE, Haiman CA. Generalizability of associations from prostate cancer genome-wide association studies in multiple populations. Cancer Epidemiol Biomarkers Prev. 2009 Apr;18(4):1285-9.
MSMB	rs10993994	10q11.2	1.0x10-3	literature	19116992	Wiklund F, Zheng SL, Sun J, Adami HO, Lilja H, Hsu FC, et al. Association of reported prostate cancer risk alleles with PSA levels among men without a diagnosis of prostate cancer. Prostate. 2009 Mar 1;69(4):419-27.
MSMB	rs10993994	10q11.2	0.002	literature	21456070	Xu Z, Bensen JT, Smith GJ, Mohler JL, Taylor JA. GWAS SNP Replication among African American and European American men in the North Carolina-Louisiana prostate cancer project (PCaP). Prostate. 2011 Jun 1;71(8):881-91.
MSMB	rs10993994	10q11.2	8.0x10-24	literature	19639606	Zhong H, Prentice RL. Correcting "winner's curse" in odds ratios from genomewide association findings for major complex human diseases. Genet Epidemiol. 2010 Jan;34(1):78-91.
MSMB	rs10993994	10q11.22	3e-08	GWASTABLE	20676098	Takata R	2010-08-01	Nat Genet
MSMB	rs10993994	10q11.22	3e-26	GWASTABLE	24753544	Knipe DW	2014-04-21	Cancer Epidemiol Biomarkers Prev
MSMB	rs10993994	10q11.22	2e-07	GWASTABLE	24740154	Lange EM	2014-04-16	PLoS One
MSMB	rs10993994	10q11.22	5e-06	GWASTABLE	21743057	Schumacher FR	2011-07-08	Hum Mol Genet
MSMB	rs10993994	10q11.22	4e-08	GWASTABLE	26443449	Wang M	2015-10-07	Nat Commun
MSMB	rs4631830	10q11.2	7e-11	GWAS Database	25434496	Sorium Kim, Chol Shin and Sun Ha Jee et al. 2014
MSMB	rs7075697	10q11.2	1.46x10-9	literature	21960693	Feng J, Sun J, Kim ST, Lu Y, Wang Z, Zhang Z, Gronberg H, Isaacs WB, Zheng SL, Xu J. A genome-wide survey over the ChIP-on-chip identified androgen receptor-binding genomic regions identifies a novel prostate cancer susceptibility locus at 12q13.13. Cancer Epidemiol Biomarkers Prev. 2011 Nov;20(11):2396-403.
MSMB	rs7076948	10q11.2	0.01	literature	19383797	Lou H, Yeager M, Li H, Bosquet JG, Hayes RB, Orr N, Yu K, et al. Fine mapping and functional analysis of a common variant in MSMB on chromosome 10q11.2 associated with prostate cancer susceptibility. Proc Natl Acad Sci U S A. 2009 May 12;106(19):7933-8.
MSMB	rs7904463	10q11.2	0.02	literature	20717903	Wang Y, Ray AM, Johnson EK, Zuhlke KA, Cooney KA, Lange EM. Evidence for an association between prostate cancer and chromosome 8q24 and 10q11 genetic variants in African American men: the Flint Men's Health Study. Prostate. 2011 Feb 15;71(3):225-31.
MSMB	rs7920517	10q11.2	0.01	literature	22303333	Barnholtz-Sloan JS, Raska P, Rebbeck TR, Millikan RC. Replication of GWAS "Hits" by Race for Breast and Prostate Cancers in European Americans and African Americans. Front Genet. 2011;2:37.
MSMB	rs7920517	10q11.2	0.001	literature	21756274	Liu F, Hsing AW, Wang X, Shao Q, Qi J, Ye Y, Wang Z, Chen H, Gao X, et al. Systematic confirmation study of reported prostate cancer risk-associated single nucleotide polymorphisms in Chinese men. Cancer Sci. 2011 Oct;102(10):1916-20.
MSMB	rs7920517	10q11.2	0.001	literature	20690139	Liu H, Wang B, Han C. Meta-analysis of genome-wide and replication association studies on prostate cancer. Prostate. 2011 Feb 1;71(2):209-24.
MSMB	rs7920517	10q11.2	0.02	literature	21829199	Vijai J, Kirchhoff T, Gallagher D, Hamel N, Guha S, Darvasi A, et al. Genetic architecture of prostate cancer in the Ashkenazi Jewish population. Br J Cancer. 2011 Sep 6;105(6):864-9.
MSMB	rs792057	10q11.2	7.2x10-13	literature	19639606	Zhong H, Prentice RL. Correcting "winner's curse" in odds ratios from genomewide association findings for major complex human diseases. Genet Epidemiol. 2010 Jan;34(1):78-91.
MSR1	rs12114368	8p22	0.3	literature	20086112	Beuten J, Gelfond JA, Franke JL, Shook S, Johnson-Pais TL, Thompson IM, Leach RJ. Single and multivariate associations of MSR1, ELAC2, and RNASEL with prostate cancer in an ethnic diverse cohort of men. Cancer Epidemiol Biomarkers Prev. 2010 Feb;19(2):588-99.
MSR1	rs12718376	8p22	0.004	literature	20086112	Beuten J, Gelfond JA, Franke JL, Shook S, Johnson-Pais TL, Thompson IM, Leach RJ. Single and multivariate associations of MSR1, ELAC2, and RNASEL with prostate cancer in an ethnic diverse cohort of men. Cancer Epidemiol Biomarkers Prev. 2010 Feb;19(2):588-99.
MSR1	rs17484273	8p22	0.02	literature	20086112	Beuten J, Gelfond JA, Franke JL, Shook S, Johnson-Pais TL, Thompson IM, Leach RJ. Single and multivariate associations of MSR1, ELAC2, and RNASEL with prostate cancer in an ethnic diverse cohort of men. Cancer Epidemiol Biomarkers Prev. 2010 Feb;19(2):588-99.
MSR1	rs351572	8p22	0.009	literature	20086112	Beuten J, Gelfond JA, Franke JL, Shook S, Johnson-Pais TL, Thompson IM, Leach RJ. Single and multivariate associations of MSR1, ELAC2, and RNASEL with prostate cancer in an ethnic diverse cohort of men. Cancer Epidemiol Biomarkers Prev. 2010 Feb;19(2):588-99.
MSR1	rs4333601	8p22	0.02	literature	20086112	Beuten J, Gelfond JA, Franke JL, Shook S, Johnson-Pais TL, Thompson IM, Leach RJ. Single and multivariate associations of MSR1, ELAC2, and RNASEL with prostate cancer in an ethnic diverse cohort of men. Cancer Epidemiol Biomarkers Prev. 2010 Feb;19(2):588-99.
MSRI	rs2410373	8p22	0.02	literature	17903305	Murabito JM, Rosenberg CL, Finger D, Kreger BE, Levy D, Splansky GL, Antman K, Hwang SJ. A genome-wide association study of breast and prostate cancer in the NHLBI's Framingham Heart Study. BMC Med Genet. 2007 Sep 19;8 Suppl 1:S6.
MSRI	rs9325782	8p22	0.008	literature	17903305	Murabito JM, Rosenberg CL, Finger D, Kreger BE, Levy D, Splansky GL, Antman K, Hwang SJ. A genome-wide association study of breast and prostate cancer in the NHLBI's Framingham Heart Study. BMC Med Genet. 2007 Sep 19;8 Suppl 1:S6.
MTNR1B	rs10830963	11q21-q22	0.03	literature	23193118	Machiela MJ, Lindstr≈m S, Allen NE, Haiman CA, Albanes D, Barricarte A, et al. Association of type 2 diabetes susceptibility variants with advanced prostate cancer risk in the Breast and Prostate Cancer Cohort Consortium. Am J Epidemiol. 2012 Dec 15;176(12):1121-9.
MYC	rs10090154	8q24	0.04	literature	22549899	Bensen JT, Xu Z, Smith GJ, Mohler JL, Fontham ET, Taylor JA. Genetic polymorphism and prostate cancer aggressiveness: a case-only study of 1,536 GWAS and candidate SNPs in African-Americans and European-Americans. Prostate. 2013 Jan;73(1):11-22.
MYC	rs10505477	8q24.21	7e-21	GWASTABLE	28139693	Hoffmann TJ	2017-01-31	Nat Commun
MYC	rs10505477	8q24.21	9e-09	GWASTABLE	24740154	Lange EM	2014-04-16	PLoS One
MYC	rs12547643	8q24	5.62x10-3	literature	20978189	Koutros S, Beane Freeman LE, Berndt SI, Andreotti G, Lubin JH, Sandler DP. Et al. Pesticide use modifies the association between genetic variants on chromosome 8q24 and prostate cancer. Cancer Res. 2010 Nov 15;70(22):9224-33.
MYC	rs1447295	8q24.21	6e-18	GWASTABLE	24753544	Knipe DW	2014-04-21	Cancer Epidemiol Biomarkers Prev
MYC	rs17186926	8q24	6.0x10-3	literature	19562729	Pal P, Xi H, Guha S, Sun G, Helfand BT, Meeks JJ, Suarez BK, Catalona WJ, Deka R. Common variants in 8q24 are associated with risk for prostate cancer and tumor aggressiveness in men of European ancestry. Prostate. 2009 Oct 1;69(14):1548-56.
MYC	rs17464492	8q24	2e-10	GWAS Database	28139693	Thomas J Hoffman et al. 2016
MYC	rs3891248	8q24	0.04	literature	18483343	Salinas CA, Kwon E, Carlson CS, Koopmeiners JS, et al. Multiple independent genetic variants in the 8q24 region are associated with prostate cancer risk. Cancer Epidemiol Biomarkers Prev. 2008 May;17(5):1203-13.
MYC	rs6999921	8q24	0.005	literature	22549899	Bensen JT, Xu Z, Smith GJ, Mohler JL, Fontham ET, Taylor JA. Genetic polymorphism and prostate cancer aggressiveness: a case-only study of 1,536 GWAS and candidate SNPs in African-Americans and European-Americans. Prostate. 2013 Jan;73(1):11-22.
MYEOV	rs10896449	11q13.2	8.30x10-10	literature	21372204	Ciampa J, Yeager M, Amundadottir L, Jacobs K, Kraft P, Chung C, et al. Large-scale exploration of gene-gene interactions in prostate cancer using a multistage genome-wide association study. Cancer Res. 2011 May 1;71(9):3287-95.
MYEOV	rs11228583	11q13.3	2e-07	GWASTABLE	24740154	Lange EM	2014-04-16	PLoS One
MYEOV	rs12270641	11q13.3	1e-11	GWASTABLE	27262462	Teerlink CC	2016-06-04	Hum Genet
MYO6	rs9443189	6q14.1	4e-08	GWASTABLE	25217961	Al Olama AA	2014-09-14	Nat Genet
NAALADL2	rs78943174	3q26.31	4e-08	GWASTABLE	25939597	Berndt SI	2015-05-05	Nat Commun
NCOA4	rs10740051	10q11.2	0.009	literature	20717903	Wang Y, Ray AM, Johnson EK, Zuhlke KA, Cooney KA, Lange EM. Evidence for an association between prostate cancer and chromosome 8q24 and 10q11 genetic variants in African American men: the Flint Men's Health Study. Prostate. 2011 Feb 15;71(3):225-31.
NCOA4	rs10761581	10q11.2	2.0x10-3	literature	19153072	Chang BL, Cramer SD, Wiklund F, Isaacs SD, Stevens VL, et al. Fine mapping association study and functional analysis implicate a SNP in MSMB at 10q11 as a causal variant for prostate cancer risk. Hum Mol Genet. 2009 Apr 1;18(7):1368-75.
NCOA4	rs10994675	10q11.2	0.01	literature	19383797	Lou H, Yeager M, Li H, Bosquet JG, Hayes RB, Orr N, Yu K, et al. Fine mapping and functional analysis of a common variant in MSMB on chromosome 10q11.2 associated with prostate cancer susceptibility. Proc Natl Acad Sci U S A. 2009 May 12;106(19):7933-8.
NCOA4	rs17178655	10q11.2	0.03	literature	22542949	Kwon EM, Holt SK, Fu R, Kolb S, Williams G, Stanford JL, Ostrander EA. Androgen metabolism and JAK/STAT pathway genes and prostate cancer risk. Cancer Epidemiol. 2012 Aug;36(4):347-53.
NCOA4	rs7350420	10q11.2	5.6x10-3	literature	22887727	FitzGerald LM, Zhang X, Kolb S, Kwon EM, Liew YC, Hurtado-Coll A, Knudsen BS, Ostrander EA, Stanford JL. Investigation of the relationship between prostate cancer and MSMB and NCOA4 genetic variants and protein expression. Hum Mutat. 2013 Jan;34(1):149-56.
NCOA4	rs7350420	10q11.2	0.007	literature	22542949	Kwon EM, Holt SK, Fu R, Kolb S, Williams G, Stanford JL, Ostrander EA. Androgen metabolism and JAK/STAT pathway genes and prostate cancer risk. Cancer Epidemiol. 2012 Aug;36(4):347-53.
NCRNA00284	rs9567349	13q14.11 x 2p21	4e-06	GWASTABLE	22219177	Tao S	2012-01-04	Carcinogenesis
NEDD9	rs4713266	6p24.2	3e-09	GWASTABLE	25217961	Al Olama AA	2014-09-14	Nat Genet
NGFR	rs11650494	17q21.32	2e-09	GWASTABLE	23535732	Eeles RA	2013-04-01	Nat Genet
NKX3-1	rs13272392	8p21.2	4e-34	GWASTABLE	28139693	Hoffmann TJ	2017-01-31	Nat Commun
NKX3-1	rs1512268	8p21.2	9.39x10-4	literature	21756274	Liu F, Hsing AW, Wang X, Shao Q, Qi J, Ye Y, Wang Z, Chen H, Gao X, et al. Systematic confirmation study of reported prostate cancer risk-associated single nucleotide polymorphisms in Chinese men. Cancer Sci. 2011 Oct;102(10):1916-20.
NKX3-1	rs1512268	8p21.2	0.007	literature	22459122	Tsilidis KK, Travis RC, Appleby PN, Allen NE, Lindstrom S, Schumacher FR, et al. Interactions between genome-wide significant genetic variants and circulating concentrations of insulin-like growth factor 1, sex hormones, and binding proteins in relation to prostate cancer risk in the National Cancer Institute Breast and Prostate Cancer Cohort Consortium. Am J Epidemiol. 2012 May 1;175(9):926-35.
NKX3-1	rs1512268	8p21.2	3e-30	GWASTABLE	19767753	Eeles RA	2009-09-20	Nat Genet
NKX3-1	rs1512268	8p21.2	4e-11	GWASTABLE	20676098	Takata R	2010-08-01	Nat Genet
NKX3-1	rs1512268	8p21.2	2.92x10-1	literature	19767753	Eeles RA, Kote-Jarai Z, Al Olama AA, Giles GG, Guy M, Severi G, Muir K. et al. Identification of seven new prostate cancer susceptibility loci through a genome-wide association study. Nat Genet. 2009 Oct;41(10):1116-21.
NKX3-1	rs1512268	8p21.2	5.52x10-7	literature	21390317	Lindstrom S, Schumacher F, Siddiq A, Travis RC, Campa D, et al. Characterizing associations and SNP-environment interactions for GWAS-identified prostate cancer risk markers--results from BPC3. PLoS One. 2011 Feb 24;6(2):e17142.
NKX3-1	rs1512268	8p21.2	1e-13	GWASTABLE	26443449	Wang M	2015-10-07	Nat Commun
NKX3-1	rs4872175	8p21.2	0.02	literature	22542949	Kwon EM, Holt SK, Fu R, Kolb S, Williams G, Stanford JL, Ostrander EA. Androgen metabolism and JAK/STAT pathway genes and prostate cancer risk. Cancer Epidemiol. 2012 Aug;36(4):347-53.
NLGN3	rs4844289	Xq13.1	1e-09	GWASTABLE	25217961	Al Olama AA	2014-09-14	Nat Genet
NOL10	rs9287719	2p25.1	3e-08	GWASTABLE	25217961	Al Olama AA	2014-09-14	Nat Genet
NOTCH2	rs10923931	1p13-p11	0.008	literature	23193118	Machiela MJ, Lindstr≈m S, Allen NE, Haiman CA, Albanes D, Barricarte A, et al. Association of type 2 diabetes susceptibility variants with advanced prostate cancer risk in the Breast and Prostate Cancer Cohort Consortium. Am J Epidemiol. 2012 Dec 15;176(12):1121-9.
NOTCH4	rs3096702	6p21.3	4.78x10-9	literature	23535732	Eeles RA, Olama AA, Benlloch S, Saunders EJ, Leongamornlert DA, Tymrakiewicz M, et al. Identification of 23 new prostate cancer susceptibility loci using the iCOGS custom genotyping array. Nat Genet. 2013 Apr;45(4):385-91.
NR2F2 x NR	rs11637980 x rs1447295	15q26.2 x 8q24.21	2e-06	GWASTABLE	22219177	Tao S	2012-01-04	Carcinogenesis
NSMCE2	rs7008482	NSMCE2	0.04	literature	20460480	Gallagher DJ, Vijai J, Cronin AM, Bhatia J, Vickers AJ. Et al. Susceptibility loci associated with prostate cancer progression and mortality. Clin Cancer Res. 2010 May 15;16(10):2819-32.
NSMCE2	rs7008482	NSMCE2	5.0x10-4	literature	17978284	Robbins C, Torres JB, Hooker S, Bonilla C, Hernandez W, Candreva A, Ahaghotu C, Kittles R, Carpten J. Confirmation study of prostate cancer risk variants at 8q24 in African Americans identifies a novel risk locus. Genome Res. 2007 Dec;17(12):1717-22.
NSMCE2	rs7008482	NSMCE2	0.003	literature	21829199	Vijai J, Kirchhoff T, Gallagher D, Hamel N, Guha S, Darvasi A, et al. Genetic architecture of prostate cancer in the Ashkenazi Jewish population. Br J Cancer. 2011 Sep 6;105(6):864-9.
NSMCE2	rs7008482	NSMCE2	0.03	literature	19549807	Xu J, Kibel AS, Hu JJ, Turner AR, Pruett K, Zheng SL. Et al. Prostate cancer risk associated loci in African Americans. Cancer Epidemiol Biomarkers Prev. 2009 Jul;18(7):2145-9.
NUCKS1	rs823123	1q32.1	5e-13	GWAS Database	25434496	Sorium Kim, Chol Shin and Sun Ha Jee et al. 2014
NUDT10	RS5945572	Xp11.22-p11.1		literature	21756274	Liu F, Hsing AW, Wang X, Shao Q, Qi J, Ye Y, Wang Z, Chen H, Gao X, et al. Systematic confirmation study of reported prostate cancer risk-associated single nucleotide polymorphisms in Chinese men. Cancer Sci. 2011 Oct;102(10):1916-20.
NUDT10	rs5945572	Xp11.22-p11.1	0.001	literature	20690139	Liu H, Wang B, Han C. Meta-analysis of genome-wide and replication association studies on prostate cancer. Prostate. 2011 Feb 1;71(2):209-24.
NUDT10	rs5945572	Xp11.22-p11.1	0.02	literature	21071540	Chang BL, Spangler E, Gallagher S, Haiman CA, Henderson B, Isaacs W. et al. Validation of genome-wide prostate cancer associations in men of African descent. Cancer Epidemiol Biomarkers Prev. 2011 Jan;20(1):23-32.
NUDT10	rs5945572	Xp11.22-p11.1	0.05	literature	18264098	Gudmundsson J, Sulem P, Rafnar T, Bergthorsson JT, Manolescu A, et al. Common sequence variants on 2p15 and Xp11.22 confer susceptibility to prostate cancer. Nat Genet. 2008 Mar;40(3):281-3.
NUDT10	rs5945572	Xp11.22-p11.1	0.0049	literature	21829199	Vijai J, Kirchhoff T, Gallagher D, Hamel N, Guha S, Darvasi A, et al. Genetic architecture of prostate cancer in the Ashkenazi Jewish population. Br J Cancer. 2011 Sep 6;105(6):864-9.
NUDT10	rs5945572	Xp11.22-p11.1	2.6x10-4	literature	19318432	Waters KM, Le Marchand L, Kolonel LN, Monroe KR, Stram DO, Henderson BE, Haiman CA. Generalizability of associations from prostate cancer genome-wide association studies in multiple populations. Cancer Epidemiol Biomarkers Prev. 2009 Apr;18(4):1285-9.
nudt10	rs5945619	Xp11.22-p11.1	1.89x10-4	literature	18264097	Eeles RA, Kote-Jarai Z, Giles GG, Olama AA, Guy M, Jugurnauth SK, Mulholland S, Leongamornlert DA, et al. Multiple newly identified loci associated with prostate cancer susceptibility. Nat Genet. 2008 Mar;40(3):316-21.
NUDT10	rs5945619	Xp11.22-p11.1	0.04	literature	21071540	Chang BL, Spangler E, Gallagher S, Haiman CA, Henderson B, Isaacs W. et al. Validation of genome-wide prostate cancer associations in men of African descent. Cancer Epidemiol Biomarkers Prev. 2011 Jan;20(1):23-32.
NUDT10	rs5945619	Xp11.22-p11.1	6.92x10-4	literature	22198737	Jin G, Lu L, Cooney KA, Ray AM, Zuhlke KA, Lange EM, Cannon-Albright LA, Camp NJ, et al. 2012. Validation of prostate cancer risk-related loci identified from genome-wide association studies using family-based association analysis: evidence from the International Consortium for Prostate Cancer Genetics (ICPCG). Hum Genet. 2012 Jul;131(7):1095-103.
NUDT10	rs5945619	Xp11.22-p11.1	2.2x10-8	literature	19639606	Zhong H, Prentice RL. Correcting "winner's curse" in odds ratios from genomewide association findings for major complex human diseases. Genet Epidemiol. 2010 Jan;34(1):78-91.
NUDT10	rs59456619	Xp11.22-p11.1	6.92x10-4	literature	22198737	Jin G, Lu L, Cooney KA, Ray AM, Zuhlke KA, Lange EM, et al. Validation of prostate cancer risk-related loci identified from genome-wide association studies using family-based association analysis: evidence from the International Consortium for Prostate Cancer Genetics (ICPCG). Hum Genet. 2012 Jul;131(7):1095-103.
NUDT11	rs5945572	Xp11.22-p11.1	0.05	literature	19902474	Hooker S, Hernandez W, Chen H, Robbins C, Torres JB, Ahaghotu C, Carpten J, Kittles RA. Replication of prostate cancer risk loci on 8q24, 11q13, 17q12, 19q33, and Xp11 in African Americans. Prostate. 2010 Feb 15;70(3):270-5.
NUDT11	rs5945572	Xp11.22-p11.1	6.17x10-11	literature	21390317	Lindstrom S, Schumacher F, Siddiq A, Travis RC, Campa D, et al. Characterizing associations and SNP-environment interactions for GWAS-identified prostate cancer risk markers--results from BPC3. PLoS One. 2011 Feb 24;6(2):e17142.
NUDT11	rs5945572	Xp11.22-p11.1	3.96x10-4	literature	22459122	Tsilidis KK, Travis RC, Appleby PN, Allen NE, Lindstrom S, Schumacher FR, et al. Interactions between genome-wide significant genetic variants and circulating concentrations of insulin-like growth factor 1, sex hormones, and binding proteins in relation to prostate cancer risk in the National Cancer Institute Breast and Prostate Cancer Cohort Consortium. Am J Epidemiol. 2012 May 1;175(9):926-35.
NUDT11	rs5945619	Xp11.22-p11.1	1.89x10-4, 1.5x10-9	literature	18264097	Eeles RA, Kote-Jarai Z, Giles GG, Olama AA, Guy M, Jugurnauth SK, Mulholland S, Leongamornlert DA, et al. Multiple newly identified loci associated with prostate cancer susceptibility. Nat Genet. 2008 Mar;40(3):316-21.
NUDT11	rs5945619	Xp11.22-p11.1	1.00x10-47	literature	22730461	Grisanzio C, Werner L, Takeda D, Awoyemi BC, Pomerantz MM. et al. Genetic and functional analyses implicate the NUDT11, HNF1B, and SLC22A3 genes in prostate cancer pathogenesis. Proc Natl Acad Sci U S A. 2012 Jul 10;109(28):11252-7.
NUDT11	rs5945619	Xp11.22-p11.1	8.27x10-13	literature	21390317	Lindstrom S, Schumacher F, Siddiq A, Travis RC, Campa D, et al. Characterizing associations and SNP-environment interactions for GWAS-identified prostate cancer risk markers--results from BPC3. PLoS One. 2011 Feb 24;6(2):e17142.
NUDT11	rs5945619	Xp11.22-p11.1	0.001	literature	20690139	Liu H, Wang B, Han C. Meta-analysis of genome-wide and replication association studies on prostate cancer. Prostate. 2011 Feb 1;71(2):209-24.
NUDT11	rs5945619	Xp11.22-p11.1	2.95x10-4	literature	22459122	Tsilidis KK, Travis RC, Appleby PN, Allen NE, Lindstrom S, Schumacher FR, et al. Interactions between genome-wide significant genetic variants and circulating concentrations of insulin-like growth factor 1, sex hormones, and binding proteins in relation to prostate cancer risk in the National Cancer Institute Breast and Prostate Cancer Cohort Consortium. Am J Epidemiol. 2012 May 1;175(9):926-35.
OTUD7A	rs16956801	15q13.1	7.65x10-5	literature	21960693	Feng J, Sun J, Kim ST, Lu Y, Wang Z, Zhang Z, Gronberg H, Isaacs WB, Zheng SL, Xu J. A genome-wide survey over the ChIP-on-chip identified androgen receptor-binding genomic regions identifies a novel prostate cancer susceptibility locus at 12q13.13. Cancer Epidemiol Biomarkers Prev. 2011 Nov;20(11):2396-403.
PARG	rs10993994	10q11.22	1e-15	GWASTABLE	25939597	Berndt SI	2015-05-05	Nat Commun
PARK7	rs6703670	1p36.23	9.09x10-4	literature	21960693	Feng J, Sun J, Kim ST, Lu Y, Wang Z, Zhang Z, Gronberg H, Isaacs WB, Zheng SL, Xu J. A genome-wide survey over the ChIP-on-chip identified androgen receptor-binding genomic regions identifies a novel prostate cancer susceptibility locus at 12q13.13. Cancer Epidemiol Biomarkers Prev. 2011 Nov;20(11):2396-403.
PDGFC	rs10023685	4q32.1	2e-09	GWASTABLE	28139693	Hoffmann TJ	2017-01-31	Nat Commun
PDLIM5	rs12500426	4q22	1.3x10-11	literature	19767753	Eeles RA, Kote-Jarai Z, Al Olama AA, Giles GG, Guy M, Severi G, Muir K, Identification of seven new prostate cancer susceptibility loci through a genome-wide association study. Nat Genet. 2009 Oct;41(10):1116-21.
PDLIM5	rs17021918	4q22	4.2x10-15	literature	19767753	Eeles RA, Kote-Jarai Z, Al Olama AA, Giles GG, Guy M, Severi G, Muir K, Identification of seven new prostate cancer susceptibility loci through a genome-wide association study. Nat Genet. 2009 Oct;41(10):1116-21.
PDLIM5	rs17021918	4q22	1.54x10-15	literature	20564319	Kim ST, Cheng Y, Hsu FC, Jin T, Kader AK, Zheng SL, Isaacs WB, Xu J, Sun J. Prostate cancer risk-associated variants reported from genome-wide association studies: meta-analysis and their contribution to genetic Variation. Prostate. 2010 Dec 1;70(16):1729-38.
PDLIM5	rs17021918	4q22	5.67x10-4	literature	22459122	Tsilidis KK, Travis RC, Appleby PN, Allen NE, Lindstrom S, Schumacher FR, et al. Interactions between genome-wide significant genetic variants and circulating concentrations of insulin-like growth factor 1, sex hormones, and binding proteins in relation to prostate cancer risk in the National Cancer Institute Breast and Prostate Cancer Cohort Consortium. Am J Epidemiol. 2012 May 1;175(9):926-35.
PDLIMS	rs12500426	4q22	0.002	literature	21390317	Lindstrom S, Schumacher F, Siddiq A, Travis RC, Campa D, et al. Characterizing associations and SNP-environment interactions for GWAS-identified prostate cancer risk markers--results from BPC3. PLoS One. 2011 Feb 24;6(2):e17142.
PDLIMS	rs17021918	4q22	5.35x10-5	literature	21390317	Lindstrom S, Schumacher F, Siddiq A, Travis RC, Campa D, et al. Characterizing associations and SNP-environment interactions for GWAS-identified prostate cancer risk markers--results from BPC3. PLoS One. 2011 Feb 24;6(2):e17142.
PEX14	rs636291	1p36.22	2e-08	GWASTABLE	25217961	Al Olama AA	2014-09-14	Nat Genet
PHF19	rs59482735	9q33.2	4e-09	GWASTABLE	28139693	Hoffmann TJ	2017-01-31	Nat Commun
PHF20L1	rs2472537	8q24.22	2.12x10-4	literature	21960693	Feng J, Sun J, Kim ST, Lu Y, Wang Z, Zhang Z, Gronberg H, Isaacs WB, Zheng SL, Xu J. A genome-wide survey over the ChIP-on-chip identified androgen receptor-binding genomic regions identifies a novel prostate cancer susceptibility locus at 12q13.13. Cancer Epidemiol Biomarkers Prev. 2011 Nov;20(11):2396-403.
PHLPP2	rs12051443	16q22.2	3e-08	GWASTABLE	25217961	Al Olama AA	2014-09-14	Nat Genet
PIK3R1	rs13156223	5q13.1	0.04	literature	21373201	Campa D, H?sing A, Stein A, Dostal L, Boeing H, Pischon T, et al. Genetic variability of the mTOR pathway and prostate cancer risk in the European Prospective Investigation on Cancer (EPIC). PLoS One. 2011 Feb 23;6(2):e16914.
PIK3R1	rs706711	5q13.1	0.01	literature	21373201	Campa D, H?sing A, Stein A, Dostal L, Boeing H, Pischon T, et al. Genetic variability of the mTOR pathway and prostate cancer risk in the European Prospective Investigation on Cancer (EPIC). PLoS One. 2011 Feb 23;6(2):e16914.
PKD1L3	rs12597458	16q22.2	1e-07	GWASTABLE	25939597	Berndt SI	2015-05-05	Nat Commun
PKHD1	rs10498792	6p21.2-p12	3e-06	nggri	19767753	Eeles RA, Kote-Jarai Z, Al Olama AA, Identification of seven new prostate cancer susceptibility loci through a genome-wide association study. 2009 Oct;41(10):1116-21
PKHD1	rs10498792	6p12.2	3e-06	GWASTABLE	17903305	Murabito JM	2007-09-19	BMC Med Genet
PKIA	rs2219968 x rs1571801	8q21.13 x 9q33.2	6e-07	GWASTABLE	22219177	Tao S	2012-01-04	Carcinogenesis
PLCL1	rs13398206 x rs10896449	2q33.1 x 11q13.3	4e-06	GWASTABLE	22219177	Tao S	2012-01-04	Carcinogenesis
PLEKHM3	rs6712527	2q33.3	3.76x10-4	literature	21960693	Feng J, Sun J, Kim ST, Lu Y, Wang Z, Zhang Z, Gronberg H, Isaacs WB, Zheng SL, Xu J. A genome-wide survey over the ChIP-on-chip identified androgen receptor-binding genomic regions identifies a novel prostate cancer susceptibility locus at 12q13.13. Cancer Epidemiol Biomarkers Prev. 2011 Nov;20(11):2396-403.
POLR2E	rs3787016	19p13.3	7.22x10-7	literature	21856995	Jin G, Sun J, Isaacs SD, Wiley KE, Kim ST, Chu LW, Zhang Z, Zhao H, Zheng SL, Isaacs WB, Xu J. Human polymorphisms at long non-coding RNAs (lncRNAs) and association with prostate cancer risk. Carcinogenesis. 2011 Nov;32(11):1655-9.
POU5F1B	rs16901979	8q24.21	1e-16	GWASTABLE	26443449	Wang M	2015-10-07	Nat Commun
POU5F1B	rs6983267	8q24.21	7.50x10-6	literature	18264096	Thomas G, Jacobs KB, Yeager M, Kraft P, Wacholder S, Orr N, Yu K, Chatterjee N, et al. Multiple loci identified in a genome-wide association study of prostate cancer. Nat Genet. 2008 Mar;40(3):310-5.
POU5F1P1	rs6998061	8q24.21	0.001	literature	19567509	Breyer JP, McReynolds KM, Yaspan BL, Bradley KM, Dupont WD, Smith JR. Genetic variants and prostate cancer risk: candidate replication and exploration of viral restriction genes. Cancer Epidemiol Biomarkers Prev. 2009 Jul;18(7):2137-44.
PPF1BP2	rs12791447	11p15.4	4e-08	GWAS Database	26443449	Meilin Wang et al. 2015
PPFIA2	rs10778826	12q21.31	0.006	literature	19767753	Eeles RA, Kote-Jarai Z, Al Olama AA, Giles GG, Guy M, Severi G, Muir K, Identification of seven new prostate cancer susceptibility loci through a genome-wide association study. Nat Genet. 2009 Oct;41(10):1116-21.
PPFIBP2	rs12791447	11p15.4	4e-08	GWASTABLE	26443449	Wang M	2015-10-07	Nat Commun
PRDM15	rs6586243	21q22.3	7.79x10-6	literature	19117981	Sun J, Zheng SL, Wiklund F, Isaacs SD, Li G, Wiley KE. Et al. Sequence variants at 22q13 are associated with prostate cancer risk. Cancer Res. 2009 Jan 1;69(1):10-5.
PRKAG2	rs11763144	7q35-q36	0.008	literature	21373201	Campa D, H?sing A, Stein A, Dostal L, Boeing H, Pischon T, et al. Genetic variability of the mTOR pathway and prostate cancer risk in the European Prospective Investigation on Cancer (EPIC). PLoS One. 2011 Feb 23;6(2):e16914.
PRKCI	rs4955720	3q26.3	0.007	literature	21373201	Campa D, H?sing A, Stein A, Dostal L, Boeing H, Pischon T, et al. Genetic variability of the mTOR pathway and prostate cancer risk in the European Prospective Investigation on Cancer (EPIC). PLoS One. 2011 Feb 23;6(2):e16914.
PRKCI	rs546950	3q26.3	0.002	literature	21373201	Campa D, H?sing A, Stein A, Dostal L, Boeing H, Pischon T, et al. Genetic variability of the mTOR pathway and prostate cancer risk in the European Prospective Investigation on Cancer (EPIC). PLoS One. 2011 Feb 23;6(2):e16914.
PRKCI	rs71277158	3q26.2	8e-14	GWASTABLE	25939597	Berndt SI	2015-05-05	Nat Commun
PRNCR1	rs56005245	8q24.21	1e-08	GWASTABLE	27262462	Teerlink CC	2016-06-04	Hum Genet
PRPH	rs10875943	12q12-q13	6.9x10-12	literature	21743467	Kote-Jarai Z, Olama AA, Giles GG, Severi G, Schleutker J, Weischer M, Campa D, et al. Seven prostate cancer susceptibility loci identified by a multi-stage genome-wide association study. Nat Genet. 2011 Jul 10;43(8):785-91.
PTGFRN	rs2806864	1p13.1	6e-07	erdisfanct/nggri	20932654	Kerns SL, Ostrer H, Stock R, Genome-wide association study to identify single nucleotide polymorphisms (SNPs) associated with the development of erectile dysfunction in African-American men after radiotherapy for prostate cancer. 2010 Dec 1;78(5):1292-300.
PTPRU	rs1866967 x rs8102476	1p35.3 x 19q13.2	5e-06	GWASTABLE	22219177	Tao S	2012-01-04	Carcinogenesis
RAB14	rs942152	9q32-q34.11	0.002	literature	18073375	Duggan D, Zheng SL, Knowlton M, Benitez D, Dimitrov L, Wiklund F, Robbins C. et al. Two genome-wide association studies of aggressive prostate cancer implicate putative prostate tumor suppressor gene DAB2IP. J Natl Cancer Inst. 2007 Dec 19;99(24):1836-44.
RACGAP1	rs615382	12q13	0.009	literature	22801071	Ricks-Santi LJ, Apprey V, Mason T, Wilson B, Abbas M, et al. Identification of genetic risk associated with prostate cancer using ancestry informative markers. Prostate Cancer Prostatic Dis. 2012 Dec;15(4):359-64
RAD23B	rs817826	9q31.2	5.45x10-14	literature	23023329	Xu J, Mo Z, Ye D, Wang M, Liu F, Jin G, Xu C, Wang X, et al. Genome-wide association study in Chinese men identifies two new prostate cancer risk loci at 9q31.2 and 19q13.4. Nat Genet. 2012 Nov;44(11):1231-5.
RAD51B	rs7141529	14q23-q24.2	2.77x10-10	literature	23535732	Eeles RA, Olama AA, Benlloch S, Saunders EJ, Leongamornlert DA, Tymrakiewicz M, et al. Identification of 23 new prostate cancer susceptibility loci using the iCOGS custom genotyping array. Nat Genet. 2013 Apr;45(4):385-91.
RAI2	rs16980679	Xp22.13	3e-15	GWASTABLE	28139693	Hoffmann TJ	2017-01-31	Nat Commun
RAL2	rs16980679	Xp22.13	3e-15	GWAS Database	28139693	Thomas J Hoffman et al. 2016
RASA1	rs35148638	5q14.3	6.49x10-9	literature	25939597	Sonja I. Berndt
RFX6	rs12202378	6q22.31	8.8x10-8	literature	21637779	Haiman CA, Chen GK, Blot WJ, Strom SS, Berndt SI, Kittles RA. Et al. Characterizing genetic risk at known prostate cancer susceptibility loci in African Americans. PLoS Genet. 2011 May;7(5):e1001387.
RFX6	rs339331	6q22.31	2e-12	nggri	19767754	Gudmundsson J, Sulem P, Gudbjartsson DF, Genome-wide association and replication studies identify four variants associated with prostate cancer susceptibility. 2009 Oct;41(10):1122-6.
RFX6	rs339331	6q22.31	3.1x10-6	literature	21637779	Haiman CA, Chen GK, Blot WJ, Strom SS, Berndt SI, Kittles RA. Et al. Characterizing genetic risk at known prostate cancer susceptibility loci in African Americans. PLoS Genet. 2011 May;7(5):e1001387.
RFX6	rs339331	6q22.31	4.43x10-5	literature	22099997	Liu M, Wang J, Xu Y, Wei D, Shi X, Yang Z. Risk loci on chromosome 8q24 are associated with prostate cancer in northern Chinese men. J Urol. 2012 Jan;187(1):315-21.
RFX6	rs339331	6q22.31	4.43x10-5	literature	22114074	Wang M, Liu F, Hsing AW, Wang X, Shao Q. et al. Replication and cumulative effects of GWAS-identified genetic variations for prostate cancer in Asians: a case-control study in the ChinaPCa consortium. Carcinogenesis. 2012 Feb;33(2):356-60.
RFX6	rs339331	6q22.1	4e-11	GWASTABLE	26443449	Wang M	2015-10-07	Nat Commun
RGS17	rs1933488	6q25.2	4e-18	GWAS Database	23535732	Al Olama et al. multiple novel 2015
RMST	rs75718479	12q23.1	1e-06	GWAS Database	26443449	Meilin Wang et al. 2015
RNASE9	rs1243647 x rs12418451	14q11.2 x 11q13.3	1e-06	GWASTABLE	22219177	Tao S	2012-01-04	Carcinogenesis
RNASEL	rs486907	1q25	0.004	literature	20086112	Beuten J, Gelfond JA, Franke JL, Shook S, Johnson-Pais TL, Thompson IM, Leach RJ. Single and multivariate associations of MSR1, ELAC2, and RNASEL with prostate cancer in an ethnic diverse cohort of men. Cancer Epidemiol Biomarkers Prev. 2010 Feb;19(2):588-99.
RNASEL	rs627928	1q25	0.03	literature	20086112	Beuten J, Gelfond JA, Franke JL, Shook S, Johnson-Pais TL, Thompson IM, Leach RJ. Single and multivariate associations of MSR1, ELAC2, and RNASEL with prostate cancer in an ethnic diverse cohort of men. Cancer Epidemiol Biomarkers Prev. 2010 Feb;19(2):588-99.
RNASEL	rs682585	1q25	0.007	literature	20086112	Beuten J, Gelfond JA, Franke JL, Shook S, Johnson-Pais TL, Thompson IM, Leach RJ. Single and multivariate associations of MSR1, ELAC2, and RNASEL with prostate cancer in an ethnic diverse cohort of men. Cancer Epidemiol Biomarkers Prev. 2010 Feb;19(2):588-99.
RP1	rs80130819	12q13.11	2e-09	GWASTABLE	25217961	Al Olama AA	2014-09-14	Nat Genet
RRAGB	rs10855058	Xp11.21	1e-08	GWASTABLE	28139693	Hoffmann TJ	2017-01-31	Nat Commun
RSG17	rs1933488		4.34x10-18	literature	23535732	Eeles RA, Olama AA, Benlloch S, Saunders EJ, Leongamornlert DA, Tymrakiewicz M, et al. Identification of 23 new prostate cancer susceptibility loci using the iCOGS custom genotyping array. Nat Genet. 2013 Apr;45(4):385-91.
RUVBL1	rs7641133	3q21	1.0x10-4	literature	21637779	Haiman CA, Chen GK, Blot WJ, Strom SS, Berndt SI, Kittles RA. Et al. Characterizing genetic risk at known prostate cancer susceptibility loci in African Americans. PLoS Genet. 2011 May;7(5):e1001387.
RXRA	rs3118536	9q34	0.02	literature	22844442	Huang SP, Bao BY, Hour TC, Huang CY, Yu CC, Liu CC, Lee YC, Huang CN, Pao JB, Huang CH. Genetic variants in CASP3, BMP5, and IRS2 genes may influence survival in prostate cancer patients receiving androgen-deprivation therapy. PLoS One. 2012;7(7):e41219.
SALL	rs7241993	16q12.1	2.19x10-9	literature	23535732	Eeles RA, Olama AA, Benlloch S, Saunders EJ, Leongamornlert DA, Tymrakiewicz M, et al. Identification of 23 new prostate cancer susceptibility loci using the iCOGS custom genotyping array. Nat Genet. 2013 Apr;45(4):385-91.
SALL3	rs7241993	18q23	2e-09	GWAS Database	23535732	Eeles RA, Olama AA, Benlloch S et al. Identification of 23 new prostate cancer susceptibility loci using the iCOGS custom genotyping array. Nat Genet. 2013 Apr;45(4):385-91, 391e1-2. doi: 10.1038/ng.2560.
SALL3, ATP9B	rs7241993	18q23	2e-09	GWASTABLE	23535732	Eeles RA	2013-04-01	Nat Genet
SERPINA3	rs8023057	14q32.13	2e-15	GWASTABLE	28139693	Hoffmann TJ	2017-01-31	Nat Commun
SHROOM2	rs2405942	Xp22.2	2.37x10-10	literature	23535732	Eeles RA, Olama AA, Benlloch S, Saunders EJ, Leongamornlert DA, Tymrakiewicz M, et al. Identification of 23 new prostate cancer susceptibility loci using the iCOGS custom genotyping array. Nat Genet. 2013 Apr;45(4):385-91.
SIDT1	rs7611694	3q13.31	3.80x10-13	literature	23535732	Eeles RA, Olama AA, Benlloch S, Saunders EJ, Leongamornlert DA, Tymrakiewicz M, et al. Identification of 23 new prostate cancer susceptibility loci using the iCOGS custom genotyping array. Nat Genet. 2013 Apr;45(4):385-91.
SIX1	rs7153648	14q23.1	2e-09	GWASTABLE	25217961	Al Olama AA	2014-09-14	Nat Genet
SLC19A2	rs3737683	1q23.3	1.27x10-4	literature	21960693	Feng J, Sun J, Kim ST, Lu Y, Wang Z, Zhang Z, Gronberg H, Isaacs WB, Zheng SL, Xu J. A genome-wide survey over the ChIP-on-chip identified androgen receptor-binding genomic regions identifies a novel prostate cancer susceptibility locus at 12q13.13. Cancer Epidemiol Biomarkers Prev. 2011 Nov;20(11):2396-403.
SLC19A2	rs3765227	1q23.3	1.26x10-4	literature	21960693	Feng J, Sun J, Kim ST, Lu Y, Wang Z, Zhang Z, Gronberg H, Isaacs WB, Zheng SL, Xu J. A genome-wide survey over the ChIP-on-chip identified androgen receptor-binding genomic regions identifies a novel prostate cancer susceptibility locus at 12q13.13. Cancer Epidemiol Biomarkers Prev. 2011 Nov;20(11):2396-403.
SLC22A1	rs4646284		1.3x10-23	GWAS Database	28139693	Thomas J. Hoffman et al. 2016
SLC22A1	rs651164	6q25.3	1.4x10-13	literature	21743057	Schumacher FR, Berndt SI, Siddiq A, Jacobs KB. Et al. Genome-wide association study identifies new prostate cancer susceptibility loci. Hum Mol Genet. 2011 Oct 1;20(19):3867-75.
SLC22A2	rs4646284G	6q25.3	1e-19	GWASTABLE	26034056	Hoffmann TJ	2015-06-01	Cancer Discov
SLC22A3	rs3123636	6q25.3	3e-09	GWASTABLE	27262462	Teerlink CC	2016-06-04	Hum Genet
SLC22A3	rs4646284	6q25.3	3.2x10-52	GWAS Database	28139693	Thomas J. Hoffman et al. 2016
SLC22A3	rs7758229	6q25.3	4e-12	GWASTABLE	25939597	Berndt SI	2015-05-05	Nat Commun
SLC22A3	rs9364554	6q25.3	5.5x10-10	literature	18264097	Eeles RA, Kote-Jarai Z, Giles GG, Olama AA, Guy M, Jugurnauth SK, Mulholland S, Leongamornlert DA, et al. Multiple newly identified loci associated with prostate cancer susceptibility. Nat Genet. 2008 Mar;40(3):316-21.
SLC22A3	rs9364554	6q25.3	4.4x10-5	literature	19366831	Fitzgerald LM, Kwon EM, Koopmeiners JS, Salinas CA, Stanford JL, Ostrander EA. Analysis of recently identified prostate cancer susceptibility loci in a population-based study: associations with family history and clinical features. Clin Cancer Res. 2009 May 1;15(9):3231-7.
SLC22A3	rs9364554	6q25.3	5.00x10-4	literature	22730461	Grisanzio C, Werner L, Takeda D, Awoyemi BC, Pomerantz MM. et al. Genetic and functional analyses implicate the NUDT11, HNF1B, and SLC22A3 genes in prostate cancer pathogenesis. Proc Natl Acad Sci U S A. 2012 Jul 10;109(28):11252-7.
SLC22A3	rs9364554	6q25.3	6e-10	nggri	19767754	Gudmundsson J, Sulem P, Gudbjartsson DF, Genome-wide association and replication studies identify four variants associated with prostate cancer susceptibility. 2009 Oct;41(10):1122-6.
SLC22A3	rs9364554	6q25.3	8.2x10-4	literature	21637779	Haiman CA, Chen GK, Blot WJ, Strom SS, Berndt SI, Kittles RA. Et al. Characterizing genetic risk at known prostate cancer susceptibility loci in African Americans. PLoS Genet. 2011 May;7(5):e1001387.
SLC22A3	rs9364554	6q25.3	1.91x10-3	literature	20564319	Kim ST, Cheng Y, Hsu FC, Jin T, Kader AK, Zheng SL, Isaacs WB, Xu J, Sun J. Prostate cancer risk-associated variants reported from genome-wide association studies: meta-analysis and their contribution to genetic Variation. Prostate. 2010 Dec 1;70(16):1729-38.
SLC22A3	rs9364554	6q25.3	3x10-6	literature	18708398	Kote-Jarai Z, Easton DF, Stanford JL, Ostrander EA, Schleutker J, Ingles SA, et al. Multiple novel prostate cancer predisposition loci confirmed by an international study: the PRACTICAL Consortium. Cancer Epidemiol Biomarkers Prev. 2008 Aug;17(8):2052-61.
SLC22A3	rs9364554	6q25.3	0.0008	literature	21390317	Lindstrom S, Schumacher F, Siddiq A, Travis RC, Campa D, et al. Characterizing associations and SNP-environment interactions for GWAS-identified prostate cancer risk markers--results from BPC3. PLoS One. 2011 Feb 24;6(2):e17142.
SLC22A3	rs9364554	6q25.3	0.001	literature	20690139	Liu H, Wang B, Han C. Meta-analysis of genome-wide and replication association studies on prostate cancer. Prostate. 2011 Feb 1;71(2):209-24.
SLC22A3	rs9364554	6q25.3	0.02	literature	22459122	Tsilidis KK, Travis RC, Appleby PN, Allen NE, Lindstrom S, Schumacher FR, et al. Interactions between genome-wide significant genetic variants and circulating concentrations of insulin-like growth factor 1, sex hormones, and binding proteins in relation to prostate cancer risk in the National Cancer Institute Breast and Prostate Cancer Cohort Consortium. Am J Epidemiol. 2012 May 1;175(9):926-35.
SLC22A3	rs9364554	6q25.3	0.002	literature	21456070	Xu Z, Bensen JT, Smith GJ, Mohler JL, Taylor JA. GWAS SNP Replication among African American and European American men in the North Carolina-Louisiana prostate cancer project (PCaP). Prostate. 2011 Jun 1;71(8):881-91.
SLC22A3	rs9364554	6q25.3	9.3x10-7	literature	19639606	Zhong H, Prentice RL. Correcting "winner's curse" in odds ratios from genomewide association findings for major complex human diseases. Genet Epidemiol. 2010 Jan;34(1):78-91.
SLC22A3	rs9364554	6q25.3	6e-12	GWASTABLE	26034056	Hoffmann TJ	2015-06-01	Cancer Discov
SLC25A37	rs2928679	8p21.2	2.64x10-1	literature	19767753	Eeles RA, Kote-Jarai Z, Al Olama AA, Giles GG, Guy M, Severi G, Muir K. et al. Identification of seven new prostate cancer susceptibility loci through a genome-wide association study. Nat Genet. 2009 Oct;41(10):1116-21.
SLC25A37	rs2928679	8p21.2	0.003	literature	21390317	Lindstrom S, Schumacher F, Siddiq A, Travis RC, Campa D, et al. Characterizing associations and SNP-environment interactions for GWAS-identified prostate cancer risk markers--results from BPC3. PLoS One. 2011 Feb 24;6(2):e17142.
SLC25A37	rs4614003	8p21.2	1e-15	GWASTABLE	28139693	Hoffmann TJ	2017-01-31	Nat Commun
SLC41A1	rs1775148	1q32.1	4e-08	GWASTABLE	25217961	Al Olama AA	2014-09-14	Nat Genet
SLC41A1	rs6679073	1q32.1	4e-15	GWASTABLE	25434496	Kim S	2014-11-27	Gene
SLC45A3	rs12409639	1q32.1	2.36x10-19	literature	23269536	Sun J, Tao S, Gao Y, Peng T, Tan A, Zhang H, Yang X, Qin X, Hu Y, et al. Genome-wide association study identified novel genetic variant on SLC45A3 gene associated with serum levels prostate-specific antigen (PSA) in a Chinese population. Hum Genet. 2013 Apr;132(4):423-9.
SLC45A3	rs16856139	1q32.1	2e-11	GWAS Database	24919509	Terao C
SLC45A3	rs2153904	1q32.1	1e-13	GWAS Database	25434496	Kim S
SLC45A3	rs4951018	1q32.1	1e-08	GWASTABLE	28139693	Hoffmann TJ	2017-01-31	Nat Commun
SLC7A	rs6625711	Xq13.1	6e-07	GWASTABLE	25217961	Al Olama AA	2014-09-14	Nat Genet
SNX16	rs13264970 x rs1571801	8q21.13 x 9q33.2	4e-06	GWASTABLE	22219177	Tao S	2012-01-04	Carcinogenesis
SOX9	rs4793529	17q24.3	2e-13	GWASTABLE	24753544	Knipe DW	2014-04-21	Cancer Epidemiol Biomarkers Prev
SP8	rs12155172	7p21.2	4.95x10-13	literature	23535732	Eeles RA, Olama AA, Benlloch S, Saunders EJ, Leongamornlert DA, Tymrakiewicz M, et al. Identification of 23 new prostate cancer susceptibility loci using the iCOGS custom genotyping array. Nat Genet. 2013 Apr;45(4):385-91.
SPATA16	rs11720607 x rs10486567	3q26.31 x 7p15.1	5e-06	GWASTABLE	22219177	Tao S	2012-01-04	Carcinogenesis
SRRM1P1	rs12682344	8q24.21	5e-12	GWASTABLE	24753544	Knipe DW	2014-04-21	Cancer Epidemiol Biomarkers Prev
SRRM1P1	rs6983267	8q24.21	4e-15	GWASTABLE	24753544	Knipe DW	2014-04-21	Cancer Epidemiol Biomarkers Prev
STAT3	rs744166	17q21	0.03	literature	22542949	Kwon EM, Holt SK, Fu R, Kolb S, Williams G, Stanford JL, Ostrander EA. Androgen metabolism and JAK/STAT pathway genes and prostate cancer risk. Cancer Epidemiol. 2012 Aug;36(4):347-53.
STMN3	rs6062509	20q13.33	4e-16	GWASTABLE	23535732	Eeles RA	2013-04-01	Nat Genet
SULT2A1	rs182420	19q13.3	0.04	literature	22542949	Kwon EM, Holt SK, Fu R, Kolb S, Williams G, Stanford JL, Ostrander EA. Androgen metabolism and JAK/STAT pathway genes and prostate cancer risk. Cancer Epidemiol. 2012 Aug;36(4):347-53.
SYK	rs290258 x rs7679673	9q22.2 x 4q24	1e-06	GWASTABLE	22219177	Tao S	2012-01-04	Carcinogenesis
TBX1	rs2238776	22q11.21	2e-08	GWASTABLE	25217961	Al Olama AA	2014-09-14	Nat Genet
TBX3	rs11067228	12q24.21	1e-14	GWASTABLE	28139693	Hoffmann TJ	2017-01-31	Nat Commun
TBX5	rs10774740	12q24.21	3e-10	GWASTABLE	25939597	Berndt SI	2015-05-05	Nat Commun
TBX5	rs1270884	12q24.1	6.75x10-11	literature	23535732	Eeles RA, Olama AA, Benlloch S, Saunders EJ, Leongamornlert DA, Tymrakiewicz M, et al. Identification of 23 new prostate cancer susceptibility loci using the iCOGS custom genotyping array. Nat Genet. 2013 Apr;45(4):385-91.
TCF2	rs11649743	17q12	7.55x10-8	literature	21390317	Lindstrom S, Schumacher F, Siddiq A, Travis RC, Campa D, et al. Characterizing associations and SNP-environment interactions for GWAS-identified prostate cancer risk markers--results from BPC3. PLoS One. 2011 Feb 24;6(2):e17142.
TCF2	rs11649743	17q12	7.5x10-8	literature	19117981	Sun J, Zheng SL, Wiklund F, Isaacs SD, Li G, Wiley KE. Et al. Sequence variants at 22q13 are associated with prostate cancer risk. Cancer Res. 2009 Jan 1;69(1):10-5.
TCF2	rs11649743	17q12	0.04	literature	22459122	Tsilidis KK, Travis RC, Appleby PN, Allen NE, Lindstrom S, Schumacher FR, et al. Interactions between genome-wide significant genetic variants and circulating concentrations of insulin-like growth factor 1, sex hormones, and binding proteins in relation to prostate cancer risk in the National Cancer Institute Breast and Prostate Cancer Cohort Consortium. Am J Epidemiol. 2012 May 1;175(9):926-35.
TCF2	rs2005705	17q12	1e-06	GWASTABLE	24740154	Lange EM	2014-04-16	PLoS One
TCF2	rs4430796	17q12	0.001	literature	17603485	Gudmundsson J, Sulem P, Steinthorsdottir V, Bergthorsson JT, Thorleifsson G, Manolescu A, Rafnar T, et al. Two variants on chromosome 17 confer prostate cancer risk, and the one in TCF2 protects against type 2 diabetes. Nat Genet. 2007 Aug;39(8):977-83. Epub 2007 Jul 1.
TCF2	rs4430796	17q12	0.008	literature	19902474	Hooker S, Hernandez W, Chen H, Robbins C, Torres JB, Ahaghotu C, Carpten J, Kittles RA. Replication of prostate cancer risk loci on 8q24, 11q13, 17q12, 19q33, and Xp11 in African Americans. Prostate. 2010 Feb 15;70(3):270-5.
TCF2	rs4430796	17q12	0.009	literature	18701471	Levin AM, Machiela MJ, Zuhlke KA, Ray AM, Cooney KA, Douglas JA. Chromosome 17q12 variants contribute to risk of early-onset prostate cancer. Cancer Res. 2008 Aug 15;68(16):6492-5.
TCF2	rs4430796	17q12	2.09x10-28	literature	21390317	Lindstrom S, Schumacher F, Siddiq A, Travis RC, Campa D, et al. Characterizing associations and SNP-environment interactions for GWAS-identified prostate cancer risk markers--results from BPC3. PLoS One. 2011 Feb 24;6(2):e17142.
TCF2	rs4430796	17q12	3.53x10-9	literature	22459122	Tsilidis KK, Travis RC, Appleby PN, Allen NE, Lindstrom S, Schumacher FR, et al. Interactions between genome-wide significant genetic variants and circulating concentrations of insulin-like growth factor 1, sex hormones, and binding proteins in relation to prostate cancer risk in the National Cancer Institute Breast and Prostate Cancer Cohort Consortium. Am J Epidemiol. 2012 May 1;175(9):926-35.
TCF2	rs7501939	17q12	2.78x10-20	literature	18264097	Eeles RA, Kote-Jarai Z, Giles GG, Olama AA, Guy M, Jugurnauth SK, Mulholland S, Leongamornlert DA, et al. Multiple newly identified loci associated with prostate cancer susceptibility. Nat Genet. 2008 Mar;40(3):316-21.
TCF2	rs7501939	17q12	0.001	literature	17603485	Gudmundsson J, Sulem P, Steinthorsdottir V, Bergthorsson JT, Thorleifsson G, Manolescu A, Rafnar T, et al. Two variants on chromosome 17 confer prostate cancer risk, and the one in TCF2 protects against type 2 diabetes. Nat Genet. 2007 Aug;39(8):977-83. Epub 2007 Jul 1.
TCF2	rs7501939	17q12	0.008	literature	18701471	Levin AM, Machiela MJ, Zuhlke KA, Ray AM, Cooney KA, Douglas JA. Chromosome 17q12 variants contribute to risk of early-onset prostate cancer. Cancer Res. 2008 Aug 15;68(16):6492-5.
TCF2	rs7501939	17q12	2.78x10-20	literature	21390317	Lindstrom S, Schumacher F, Siddiq A, Travis RC, Campa D, et al. Characterizing associations and SNP-environment interactions for GWAS-identified prostate cancer risk markers--results from BPC3. PLoS One. 2011 Feb 24;6(2):e17142.
TCF2	rs7501939	17q12	1.01x10-6	literature	22459122	Tsilidis KK, Travis RC, Appleby PN, Allen NE, Lindstrom S, Schumacher FR, et al. Interactions between genome-wide significant genetic variants and circulating concentrations of insulin-like growth factor 1, sex hormones, and binding proteins in relation to prostate cancer risk in the National Cancer Institute Breast and Prostate Cancer Cohort Consortium. Am J Epidemiol. 2012 May 1;175(9):926-35.
TCF2	rs7501939	17q12	2e-06	GWASTABLE	21743057	Schumacher FR	2011-07-08	Hum Mol Genet
TCF7L2	rs7903146	10q25.3	0.009	literature	23193118	Machiela MJ, Lindstr≈m S, Allen NE, Haiman CA, Albanes D, Barricarte A, et al. Association of type 2 diabetes susceptibility variants with advanced prostate cancer risk in the Breast and Prostate Cancer Cohort Consortium. Am J Epidemiol. 2012 Dec 15;176(12):1121-9.
TERT	rs2242652	5p15.33	2.7x10-24	literature	18708398	Kote-Jarai Z, Easton DF, Stanford JL, Ostrander EA, Schleutker J, Ingles SA, et al. Multiple novel prostate cancer predisposition loci confirmed by an international study: the PRACTICAL Consortium. Cancer Epidemiol Biomarkers Prev. 2008 Aug;17(8):2052-61.
TERT	rs2242652	5p15.33	2.7x10-24	literature	21743467	Kote-Jarai Z, Olama AA, Giles GG, Severi G, Schleutker J, Weischer M, Campa D, et al. Seven prostate cancer susceptibility loci identified by a multi-stage genome-wide association study. Nat Genet. 2011 Jul 10;43(8):785-91.
TERT	rs2242652	5p15.33	3e-24	nggri	18264096	Thomas G, Jacobs KB, Yeager M, Multiple loci identified in a genome-wide association study of prostate cancer. 2008 Mar;40(3):310-5
TERT	rs2736098	5p15.33	3x10-10	literature	21160077	Gudmundsson J, Besenbacher S, Sulem P, Gudbjartsson DF, Olafsson I, et al. Genetic correction of PSA values using sequence variants associated with PSA levels. Sci Transl Med. 2010 Dec 15;2(62):62ra92.
TERT	rs37004	5p15.33	9e-13	GWASTABLE	28139693	Hoffmann TJ	2017-01-31	Nat Commun
TERT	rs7725218	5p15.33	3e-11	GWASTABLE	25939597	Berndt SI	2015-05-05	Nat Commun
TET2	rs7679673	4q24	1.19x10-2	literature	19767753	Eeles RA, Kote-Jarai Z, Al Olama AA, Giles GG, Guy M, Severi G, Muir K. et al. Identification of seven new prostate cancer susceptibility loci through a genome-wide association study. Nat Genet. 2009 Oct;41(10):1116-21.
TET2	rs7679673	4q24	6.74x10-10	literature	21390317	Lindstrom S, Schumacher F, Siddiq A, Travis RC, Campa D, et al. Characterizing associations and SNP-environment interactions for GWAS-identified prostate cancer risk markers--results from BPC3. PLoS One. 2011 Feb 24;6(2):e17142.
TET2	rs7679673	4q24	9.39x10-3	literature	21756274	Liu F, Hsing AW, Wang X, Shao Q, Qi J, Ye Y, Wang Z, Chen H, Gao X, et al. Systematic confirmation study of reported prostate cancer risk-associated single nucleotide polymorphisms in Chinese men. Cancer Sci. 2011 Oct;102(10):1916-20.
TET2	rs7679673	4q24	2.02x10-4	literature	22459122	Tsilidis KK, Travis RC, Appleby PN, Allen NE, Lindstrom S, Schumacher FR, et al. Interactions between genome-wide significant genetic variants and circulating concentrations of insulin-like growth factor 1, sex hormones, and binding proteins in relation to prostate cancer risk in the National Cancer Institute Breast and Prostate Cancer Cohort Consortium. Am J Epidemiol. 2012 May 1;175(9):926-35.
TET2	rs7679673	4q24	4e-09	GWASTABLE	25939597	Berndt SI	2015-05-05	Nat Commun
TH	rs7126629	11p15.5	2e-08	GWASTABLE	24740154	Lange EM	2014-04-16	PLoS One
TH	rs7127900	11p15.5	3.06x10-1	literature	19767753	Eeles RA, Kote-Jarai Z, Al Olama AA, Giles GG, Guy M, Severi G, Muir K. et al. Identification of seven new prostate cancer susceptibility loci through a genome-wide association study. Nat Genet. 2009 Oct;41(10):1116-21.
THADA	rs1465618	2p21	1.6x10-8	literature	19767753	Eeles RA, Kote-Jarai Z, Al Olama AA, Giles GG, Guy M, Severi G, Muir K, Identification of seven new prostate cancer susceptibility loci through a genome-wide association study. Nat Genet. 2009 Oct;41(10):1116-21.
THADA	rs1465618	2p21	4.92x10-3	literature	20564319	Kim ST, Cheng Y, Hsu FC, Jin T, Kader AK, Zheng SL, Isaacs WB, Xu J, Sun J. Prostate cancer risk-associated variants reported from genome-wide association studies: meta-analysis and their contribution to genetic Variation. Prostate. 2010 Dec 1;70(16):1729-38.
THADA	rs1465618	2p21	1.02x10-5	literature	21390317	Lindstrom S, Schumacher F, Siddiq A, Travis RC, Campa D, et al. Characterizing associations and SNP-environment interactions for GWAS-identified prostate cancer risk markers--results from BPC3. PLoS One. 2011 Feb 24;6(2):e17142.
THADA	rs1465618	2p21	0.02	literature	21756274	Liu F, Hsing AW, Wang X, Shao Q, Qi J, Ye Y, Wang Z, Chen H, Gao X, et al. Systematic confirmation study of reported prostate cancer risk-associated single nucleotide polymorphisms in Chinese men. Cancer Sci. 2011 Oct;102(10):1916-20.
THADA	rs1465618	2p21	2e-08	nggri	18264096	Thomas G, Jacobs KB, Yeager M, Multiple loci identified in a genome-wide association study of prostate cancer. 2008 Mar;40(3):310-5
THEG5	rs11084596	19q12	1e-15	GWASTABLE	28139693	Hoffmann TJ	2017-01-31	Nat Commun
TIMM23	rs10763567	10q11.22	6e-10	GWASTABLE	27262462	Teerlink CC	2016-06-04	Hum Genet
TLR4	rs6478343	9q33.1	2e-08	GWASTABLE	28139693	Hoffmann TJ	2017-01-31	Nat Commun
TMPRSS2	rs1041449	21q22.3	3e-08	GWASTABLE	25217961	Al Olama AA	2014-09-14	Nat Genet
TMTC2	rs12317459	12q21.31 x 8q24.21	4e-06	GWASTABLE	22219177	Tao S	2012-01-04	Carcinogenesis
TNC	rs7847271	9q33.1 x 3q21.3	4e-06	GWASTABLE	22219177	Tao S	2012-01-04	Carcinogenesis
TNFSF10	rs3774315	3q26	0.002	literature	21467234	FitzGerald LM, Kwon EM, Conomos MP, Kolb S, Holt SK, Levine D, Feng Z, Ostrander EA, Stanford JL. Genome-wide association study identifies a genetic variant associated with risk for more aggressive prostate cancer. Cancer Epidemiol Biomarkers Prev. 2011 Jun;20(6):1196-203.
TNRC6B	rs11704416	22q13.1	4e-06	GWASTABLE	23065704	Amin Al Olama A	2012-10-12	Hum Mol Genet
TNRC6B	rs7291691	22q13	5.61x10-5	literature	19117981	Sun J, Zheng SL, Wiklund F, Isaacs SD, Li G, Wiley KE. Et al. Sequence variants at 22q13 are associated with prostate cancer risk. Cancer Res. 2009 Jan 1;69(1):10-5.
TNRC6B	rs9623117	22q13	1.22x10-3	literature	20564319	Kim ST, Cheng Y, Hsu FC, Jin T, Kader AK, Zheng SL, Isaacs WB, Xu J, Sun J. Prostate cancer risk-associated variants reported from genome-wide association studies: meta-analysis and their contribution to genetic Variation. Prostate. 2010 Dec 1;70(16):1729-38.
TNRC6B	rs9623117	22q13	5e-07	nggri	18264096	Thomas G, Jacobs KB, Yeager M, Multiple loci identified in a genome-wide association study of prostate cancer. 2008 Mar;40(3):310-5
TNRC6B	rs9623117	22q13.1	5e-07	GWASTABLE	19117981	Sun J	2009-01-01	Cancer Res
TNRC6B	rs12628051	22q13.1 x 11p15.5	3e-06	GWASTABLE	22219177	Tao S	2012-01-04	Carcinogenesis
TNRC6B	rs4821941	22q13.1 x 11p15.5	4e-06	GWASTABLE	22219177	Tao S	2012-01-04	Carcinogenesis
TNS3	rs56232506	7p12.3	9e-09	GWASTABLE	25217961	Al Olama AA	2014-09-14	Nat Genet
TRIM31	rs115457135	6p22.1	1e-07	GWASTABLE	25217961	Al Olama AA	2014-09-14	Nat Genet
TRIM8	rs3850699	10q24.3	4.87x10-10	literature	23535732	Eeles RA, Olama AA, Benlloch S, Saunders EJ, Leongamornlert DA, Tymrakiewicz M, et al. Identification of 23 new prostate cancer susceptibility loci using the iCOGS custom genotyping array. Nat Genet. 2013 Apr;45(4):385-91.
TSEN2	rs6766510	3p25.2 x 10q11.22	2e-06	GWASTABLE	22219177	Tao S	2012-01-04	Carcinogenesis
TTC7A	rs10194115	2p16.3	5e-07	erdisfanct/nggri	20932654	Kerns SL, Ostrer H, Stock R, Genome-wide association study to identify single nucleotide polymorphisms (SNPs) associated with the development of erectile dysfunction in African-American men after radiotherapy for prostate cancer. 2010 Dec 1;78(5):1292-300.
TTC9	rs8014671	14q24.2	3e-07	GWASTABLE	25217961	Al Olama AA	2014-09-14	Nat Genet
TTLL1	rs5759167	22q13.1	3.01x10-3	literature	19767753	Eeles RA, Kote-Jarai Z, Al Olama AA, Giles GG, Guy M, Severi G, Muir K. et al. Identification of seven new prostate cancer susceptibility loci through a genome-wide association study. Nat Genet. 2009 Oct;41(10):1116-21.
TUBA1	rs10875943	2q36.1	0.002	literature	21743467	Kote-Jarai Z, Olama AA, Giles GG, Severi G, Schleutker J, Weischer M, Campa D, et al. Seven prostate cancer susceptibility loci identified by a multi-stage genome-wide association study. Nat Genet. 2011 Jul 10;43(8):785-91.
TXLNG	rs5969745	Xp22.2	3e-13	GWASTABLE	28139693	Hoffmann TJ	2017-01-31	Nat Commun
UPF2 x NR	rs10795917 x rs8102476	10p14 x 19q13.2	7e-07	GWASTABLE	22219177	Tao S	2012-01-04	Carcinogenesis
VAMP8	RS10187424	2p12-p11.2	0.003	literature	21743467	Kote-Jarai Z, Olama AA, Giles GG, Severi G, Schleutker J, Weischer M, Campa D, et al. Seven prostate cancer susceptibility loci identified by a multi-stage genome-wide association study. Nat Genet. 2011 Jul 10;43(8):785-91.
VDR	rs731236	12q12-q14	0.04	literature	21358824	Bonilla C, Hooker S, Mason T, Bock CH, Kittles RA. Prostate cancer susceptibility Loci identified on chromosome 12 in African Americans. PLoS One. 2011 Feb 16;6(2):e16044.
VDR	rs7975128	12q12-q14	0.02	literature	21358824	Bonilla C, Hooker S, Mason T, Bock CH, Kittles RA. Prostate cancer susceptibility Loci identified on chromosome 12 in African Americans. PLoS One. 2011 Feb 16;6(2):e16044.
VEGFA	rs6920449	6p21.1	6e-12	GWASTABLE	28139693	Hoffmann TJ	2017-01-31	Nat Commun
VGLL3	rs2660753	3p12.1	6e-06	GWASTABLE	26443449	Wang M	2015-10-07	Nat Commun
VGLL3	rs9757252 x rs17021918	3p12.1 x 4q22.3	5e-06	GWASTABLE	22219177	Tao S	2012-01-04	Carcinogenesis
WDR11	rs10749415	10q26.13	9e-25	GWASTABLE	28139693	Hoffmann TJ	2017-01-31	Nat Commun
WDR11	rs200367988	10q26.12	5e-18	GWASTABLE	28139693	Hoffmann TJ	2017-01-31	Nat Commun
WDR52	rs7611694		4e-13	GWASTABLE	23535732	Eeles RA	2013-04-01	Nat Genet
WWOX	rs11150069	16q23.3-q24.1	9.43x10-6	literature	21467234	FitzGerald LM, Kwon EM, Conomos MP, Kolb S, Holt SK, Levine D, Feng Z, Ostrander EA, Stanford JL. Genome-wide association study identifies a genetic variant associated with risk for more aggressive prostate cancer. Cancer Epidemiol Biomarkers Prev. 2011 Jun;20(6):1196-203.
XAGE3	rs2807031	Xp11.22	3e-11	GWASTABLE	25217961	Al Olama AA	2014-09-14	Nat Genet
XYLT1	rs12918539	16p12	7.38x104	literature	21960693	Feng J, Sun J, Kim ST, Lu Y, Wang Z, Zhang Z, Gronberg H, Isaacs WB, Zheng SL, Xu J. A genome-wide survey over the ChIP-on-chip identified androgen receptor-binding genomic regions identifies a novel prostate cancer susceptibility locus at 12q13.13. Cancer Epidemiol Biomarkers Prev. 2011 Nov;20(11):2396-403.
ZBTB38	rs1991431	3q23	3e-11	GWASTABLE	28139693	Hoffmann TJ	2017-01-31	Nat Commun
ZBTB38	rs6763931	3q23	2.0x10-8	literature	18708398	Kote-Jarai Z, Easton DF, Stanford JL, Ostrander EA, Schleutker J, Ingles SA, et al. Multiple novel prostate cancer predisposition loci confirmed by an international study: the PRACTICAL Consortium. Cancer Epidemiol Biomarkers Prev. 2008 Aug;17(8):2052-61.
ZBTB38	rs6763931	3q23	2e-08	nggri	17401363	Yeager M, Orr N, Hayes RB, Genome-wide association study of prostate cancer identifies a second risk locus at 8q24. 2007 May;39(5):645-9
ZBTB38	rs6763931	3q23	2e-08	GWASTABLE	21743467	Kote-Jarai Z	2011-07-10	Nat Genet
ZGPAT	rs6062509	20q13.3	3.57x10-16	literature	23535732	Eeles RA, Olama AA, Benlloch S, Saunders EJ, Leongamornlert DA, Tymrakiewicz M, et al. Identification of 23 new prostate cancer susceptibility loci using the iCOGS custom genotyping array. Nat Genet. 2013 Apr;45(4):385-91.
ZNF280B x TET2	rs5751168 x rs7679673	22q11.22 x 4q24	4e-06	GWASTABLE	22219177	Tao S	2012-01-04	Carcinogenesis
ZNF652	rs7210100	17q21.32	3.4x10-13	literature	21637779	Haiman CA, Chen GK, Blot WJ, Strom SS, Berndt SI, Kittles RA. Et al. Characterizing genetic risk at known prostate cancer susceptibility loci in African Americans. PLoS Genet. 2011 May;7(5):e1001387.
ZNF652	rs7210100	17q21.32	3e-13	nggri	17401363	Yeager M, Orr N, Hayes RB, Genome-wide association study of prostate cancer identifies a second risk locus at 8q24. 2007 May;39(5):645-9
ZNF652	rs7210100	17q21.33	3e-13	GWASTABLE	21602798	Haiman CA	2011-05-22	Nat Genet
ZNF827	rs13149290	4q31.22	2.56x10-5	literature	18073375	Duggan D, Zheng SL, Knowlton M, Benitez D, Dimitrov L, Wiklund F, Robbins C. et al. Two genome-wide association studies of aggressive prostate cancer implicate putative prostate tumor suppressor gene DAB2IP. J Natl Cancer Inst. 2007 Dec 19;99(24):1836-44.
ZNF827	rs56935123	4q31.22	4e-09	GWASTABLE	28139693	Hoffmann TJ	2017-01-31	Nat Commun

## Sheet: Unique genes
2018-03-08
ABLIM1
ACOXL
ADAM15
ADAMTS12
ADCY5
ADNP
AKR1C3
AMIGO2
AR
ARL15
ARMC4
ATF7IP
BAIAP2L1
BCL11A
BIK
BMP5
BMPR1A
BOD1
BOK
BRCA1
C9orf3
CASC8
CASP3
CCDC88C
CCHCR1
CD180
CDH13
CDKAL1
CDKN2A
CDKN2B
CHEK2
CHMP2B
CHST9
CLDN11
HNF1B
CNNM2
COMMD3
COX18
CPNE3
CTBP2
CTDSPL
DBIL5P
DDHD1
DERL1
DLEU1
DNAH5
EBF2
EEFSEC
EHBP1
EHF
EIF2S3
ELAC2
EPHA10
ERG
ESR2
EVC
PPP1R14A
FAM111A
FAM111B
FAM124A
FAM84B
FARP2
FBXO34
FCHSD1
FERMT2
FGF10
FGFR2
FOXP4
FREM1
FTO
FYCO1
GADD45A
GALNTL6
GGCX
GHR
GLI2
GLIS2
GOLPH3L
GPR143
HAPLN1
HERC2
HLA-DRB6
HOXB13
HSD17B3
IGF2
IKZF2
IL16
IL1RAPL1
INHBA
IRS2
IRX4
ITGA6
JAK2
JAZF1
KCNN3
KCNQ1
KIAA1211
KLF4
KLF5
KLK13
KLK15
KLK2
KLK3
KRT8
LINC00506
LMO4
LMTK2
LRP1B
LRRN2
MAML3
MDM4
MLPH
MMP7
MN1
MSMB
MSR1
MYC
MYO6
NAALADL2
NCOA4
NEDD9
NGFR
NKX3-1
NLGN3
NOL10
NOTCH2
NOTCH4
NR2F2
NSMCE2
NUCKS1
NUDT10
NUDT11
OTUD7A
PARG
PARK7
PDGFC
PDLIM5
PEX14
PHF19
PHF20L1
PHLPP2
PIK3R1
PKHD1
PLEKHM3
POLR2E
POU5F1B
PPFIA2
PPFIBP2
PRDM15
PRKAG2
PRKCI
PTGFRN
RAB14
RACGAP1
RAD23B
RAD51B
RAI2
RASA1
RFX6
RGS17
RMST
RNASEL
RRAGB
RUVBL1
RXRA
SALL3
ATP9B
SERPINA3
SHROOM2
SIDT1
SIX1
SLC19A2
SLC22A1
SLC22A3
SLC25A37
SLC41A1
SLC45A3
SOX9
SP8
STAT3
STMN3
TBX1
TBX3
TBX5
TCF7L2
TET2
THADA
TIMM23
TLR4
TMPRSS2
TMTC2
TNC
TNFSF10
TNRC6B
TNS3
TRIM31
TRIM8
TSEN2
TTC7A
TTC9
TTLL1
TXLNG
UPF2
VAMP8
VDR
VEGFA
VGLL3
WDR11
WWOX
XYLT1
ZBTB38
ZGPAT
ZNF280B
ZNF652
ZNF827
AKIRIN2
BMPR1B
CCDC86
CCL19
CCNH
CEACAM21
CFHR3
CNTNAP5
CTNNA2
CXCL14
CYP17A1
DAB21P
DAB2IP
DEPDC2
DUSP6
ELA2A
ETV1
FANCC
FBX034
FLT1
FSHB
GPLD1
GPR161
GZF1
HIST1H1A
HIST1H3E
HSD17B4
ILRAPL1
ITGAX
KIAA1045
KIAA1128
KIAA1505
LDAH
LMTK
LPCAT2
LUCAT1
MMP-7
MOB3B
MYEOV
NSFL1C
ORC3
OXR1
PCAT19
PGBD1
POU1F1
SCAPER
SIGLEC14
SLC35B4
SLC8A
SULT2A1

## Sheet: Frequency
Gene symbol	SNP_ID	REGION	GWAS P-Value	frequency
2018-03-08	rs76934034	10q11.22	1e-08	1
ABLIM1	rs10885582	10q25.3	4e-06	1
ACOXL	rs3789080	2q13	4e-06	1
ACTBL2	rs10940579	5q11.2	4e-06	1
ACTC1	rs543686	15q14	4e-06	1
ADAM15	rs1218582	1q21.3	2e-08	1
ADAMTS12	rs2548035	q35	5.11x10-5	1
ADCY5	rs11708067	3q21.1	0.03	1
ADNP	rs12480328	20q13.13	5e-11	1
AKR1C3	rs4881400	10p15-p14	0.03	1
AMIGO2	rs2711721	12q13.11 x 22q13.2	2e-06	1
ANK2	rs7694725	4q25 x 8q24.21	2e-06	1
ANP32D	rs4489787	12q13.11 x 17q12	1e-06	1
ANXA13	rs13258681	8q24.13 x 11p15.5	4e-06	1
AR	rs5919432	Xq12	1e-08	1
ARL15	rs792017	5p15.2	5.4x10-19	1
ARMC4	rs2492906	10p12.1	1e-08	1
ATF7IP	rs3213764	12p13.1	2e-09	1
ATP5SL	rs11672691	19q13.2	1e-08	1
ATP9B	rs7241993	18q23	2e-09	1
BAI3	rs9351730	6q12 x 6q25.3	5e-06	1
BAIAP2L1	rs9649213	7q21.3 x 10q26.13	1e-06	1
BCL11A	rs2556375	2p16.1	6e-19	1
BIK	rs742134	22q13.31	6e-06	2
BMP5	rs3734444	6p12.1	<0.04	1
BMPR1A	rs11597689	10q22.3	0.03	1
BOD1	rs6869841	5q35.2	5e-08	1
BOK	rs3771570	2q37.3	5e-09	1
BRCA1	rs1799950	17q21.31	0.01	1
C14ORF118	rs3813546	14q24.3	7.42x10-4	1
C16orf78	rs8057939	16q12.1	5e-06	1
C18orf34	rs6507016	18q12.1	4e-06	1
C2ORF43	rs13385191	2p24.1	7.5x10-8	2
C2orf48	rs11902236	2p25.1	3e-08	1
C7orf66	rs10277209	7q31.1	4e-06	1
C9orf123	rs12682851	9p24.1	2e-06	1
C9orf3	rs3802458	9q22	4e-06	1
C9ORF46	rs1535453	9p24.1	6.84x10-5	1
CASC19	rs138042437	8q24.21	2e-08	1
CASC8	rs4506170	8q24.21	2e-09	1
CASP3	rs4862396	4q34	0.04	1
CCDC88C	rs17127296	14q32.12	9.00x10-5	1
CCHCR1	rs130067	6p21.3	3.2x10-8	1
CD180	rs7717572	5q13.1 x 3p12.1	3e-06	1
CD200R1L	rs1002979	3q13.2 x 2q31.1	3e-06	1
CDH13	rs4782780	16q23.3	1.1x10-6	2
CDKAL1	rs12198220	6p22.3	2e-07	1
CDKN2A	rs10811661	9p21	0.04	1
CDKN2B	rs17694493	9p21.3	1e-06	1
CEP152	rs784411	15q21.1 x 11q13.3	1e-07	1
CHEK2	rs78554043	22q12.1	8e-10	1
CHL1	rs12485321	3p26.3 x 7q21.3	3e-06	1
CHMP2B	rs2660753	3p12.1	0.007	1
CHST9	rs6983561	18q12.1	0.003	1
CLDN11	rs10936632	3q26.2	7e-22	1
CNGB3	rs4961199	8q21.3	2.79x10-2	1
CNNM2	rs3850699	10q24.32	5e-10	1
CNTN6	rs6763848	3p26.3 x 22q13.1	4e-06	1
COMMD3	rs116940348	10p12.31	1e-14	1
COX18	rs1894292	4q13.3	5e-13	2
CPNE3	rs4961199	8q21	0.01	1
CTBP2	rs4962416	10q26.13	1.05x10-7	1
CTDSPL	rs9311171	3p21.3	2e-06	1
CWC22	rs16867225 x rs1859962	2q31.3 x 17q24.3	3e-06	1
CYP17A1	rs10786712	10q24.3	0.03	1
CYP21A2	rs3096702	6p21.32	5e-09	1
DAB2IP	rs1571801	9p21	2.01x10-3	1
DBIL5P	rs684232	17p13.3	5e-15	1
DDHD1	rs8008270	14q22.1	2e-14	1
DERL1	rs13259131	8q24.13	5.25x10-5	1
DLEU1	rs202346	13q14.3	3e-22	1
DNAH12	rs1916284 x rs12418451	3p14.3 x 11q13.3	1e-06	1
DNAH5	rs4463179 x rs887391	5p15.2 x 19q13.2	2e-06	1
EBF2	rs11135910	8p21.2	8e-11	1
EEFSEC	rs4857841	3q21.3	6.79x10-6	2
EHBP1	rs2430386	2p15	9e-12	6
EHF	rs4378355	11p13	2e-10	1
EIF2S3	rs6627995	Xp22.11	1e-13	1
ELA2A	rs2901964	1p36.21	5e-06	1
ELAC2	rs11545302	17p11.2	1.0x10-5	2
EPHA10	rs731174 x rs4430796	1p34.3 x 17q12	5e-06	1
ERG	rs2836370	21q22.3	0.01	1
ESR2	rs58262369	14q23.2	6e-10	1
EVC	rs735172 x rs887391	4p16.2 x 19q13.2	2e-06	1
FAM111A	rs1938781	11q12.1	1.10x10-10	1
FAM111B	rs1938781	11q12.1	1.10x10-10	1
FAM124A	rs10492519	13q14.3	5.6x10-6	1
FAM82A1	rs6741148	2p22.2	4e-06	1
FAM84B	rs2293850	8q24.13	0.01	5
FARP2	rs3771570	2q37.3	5.22x10-9	1
FBXO34	rs8015211	14q22.1	1.64x10-5	1
FCHSD1	rs251177	5q31.3	0.0002	1
FERMT2	rs8008270	14q22.1	1.78x10-14	1
FGF10	rs2121875	5p13-p12	4.0x10-8	1
FGFR2	rs10886902	10q26.12	2e-53	2
FOXP4	rs1983891	6p21.1	7.6x10-8	1
FREM1	rs1552895	9p22.3	0.002	1
FSHR	rs2268363	2p21-p16	5e-08	1
FTO	rs9939609	16q12.2	0.04	1
FYCO1	rs1545985	3p21.3	6.61x10-6	2
GADD45A	rs520820	1p31.2	0.02	2
GALNTL6	rs494770	4q34.1	0.01	1
GGC	RS10187424	7p15-p14	3.1x10-15	1
GGCX	rs10187424	2p11.2	3e-15	2
GHR	rs2940920	5p14-p12	3.76x10-4	2
GLI2	rs11122834	2q14	5e-06	1
GLIS2	rs9921192	16p13.3	1e-09	1
GOLPH3L	rs17599629	1q21.3	6e-11	1
GPR143	rs2405942	Xp22.2	2e-10	1
GPRC6A	rs339331	6q22.31	1.6x10-12	1
GTPBP5	rs2427345	20q13.33	4e-08	1
HAPLN1	rs4466137	5q14.3	3e-06	1
HERC2	rs6497287	15q13	0.004	1
HLA-DRB6	rs115306967	6p21.32	3e-09	1
HNF1B	rs8064454	17q12	8e-29	14
HOXB13	rs188140481	8q24.21	6e-34	2
HSD17B3	rs2253502	9q22	0.004	3
HTR3B	rs11214775	11q23.2	5e-08	1
IGF2	rs7127900	11p15.5	3.06x10-1	1
IGF2AS	rs7127900	11p15.5	3.06x10-1	1
IKZF2	rs7569918	2q13.1	8.85x10-4	1
IL16	rs7175701	15q26.3	9.8x10-8	1
IL1RAPL1	rs225061	Xp22.1-p21.3	9.71x10-4	1
INHBA	rs7789197 x rs1447295	7p14.1 x 8q24.21	3e-06	1
INS	rs7127900	11p15.5	3.06x10-1	1
INSC	rs11605083 x rs7679673	11p15.2 x 4q24	4e-06	1
IRS2	rs75823044	13q34	6e-12	2
IRX4	rs12653946	5p15.33	3.9x10-18	1
ITGA6	rs126212278	2q31.1	0.001	2
JAK2	rs10429491	9p24	0.002	1
JAZF1	rs1080784	7p15.2-p15.1	2.96x10-10	7
KCNN3	rs1218582	1q21.3	1.95x10-8	1
KCNQ1	rs231362	11p15.5	0.01	1
KCTD16	rs6580317	5q32	4.66x10-5	1
KIAA1211	rs629242	4q12	7.25x10-7	1
KIF13A	rs10456809	6p22.3 x 8q24.21	5e-06	1
KLF4	rs817826	9q31.2	5e-14	1
KLF5	rs9600079	13q22.1	1e-06	1
KLK13	rs2736433	19q13.33	0.05	1
KLK15	rs2659056	19q13.4	2.7x10-4	3
KLK2	rs1354774	19q13.33	6e-20	5
KLK3	rs2739472; rs6070; rs11665748; rs17632542; rs266849; rs266868; rs61752561	19q13.41	9e-186	15
KLK5	rs268908	19q13.33	0.001	1
KRT8	rs4919743	12q13.13	3.64x10-4	2
LACE1	rs2273669	6q21	8e-09	1
LILRA3	rs103294	19q13.4	5.34x10-16	1
LINC00506	rs17023900	3p12.1	1e-11	1
LMO4	rs6662386	1p22.3	7e-20	1
LMTK2	rs6465657	7q22.1	0.007	1
LOC100505495	rs887391	19	3.2x10-7	1
LOC285232	rs2660753	3p12.1	4.88x10-1	1
LOC285830	rs2523395	6p22.1 x 8p21.2	2e-06	1
LOC338694	rs7929962	11q13.3	2e-13	1
LOC340602	rs5945572	Xp11.22	4e-13	1
LOC63930	rs6089829	20q13.33 x 19q13.33	3e-06	1
LOC727677	rs4242382	8q24.21	1e-34	4
LOC729852	rs13225697	7p21.3	0.008	2
LRP1B	rs10210358	2q21.2	2e-06	1
LRRN2	rs4245739	1q32.1	2e-11	1
MAML3	rs736349	4q28	0.002	1
MDM4	rs4245739	1q32	2.01x10-11	1
MIR4319	rs998124 x rs10934853	18q12.3 x 3q21.3	5e-06	1
MIR622	rs16944141 x rs1512268	13q31.3 x 8p21.2	3e-06	1
MIR656	rs2400997 x rs10934853	14q32.31 x 3q21.3	3e-06	1
MLPH	rs2292884	2q37.2	4e-08	1
MMP7	rs12285347	11q22.2	8e-12	2
MMP8	rs11568818	11q22.2	2e-11	1
MN1	rs6005451	22q12.1 x 8q24.21	4e-06	1
MSMB	RS0993994	10q11.2	8.7x10-29	8
MSR1	rs12718376	8p22	0.004	5
MTNR1B	rs10830963	11q21-q22	0.03	1
MYC	rs10505477	8q24.21	7e-21	8
MYEOV	rs12270641	11q13.3	1e-11	3
MYO6	rs9443189	6q14.1	4e-08	1
NAALADL2	rs78943174	3q26.31	4e-08	1
NCOA4	rs10761581	10q11.2	2.0x10-3	5
NCRNA00284	rs9567349	13q14.11 x 2p21	4e-06	1
NEDD9	rs4713266	6p24.2	3e-09	1
NGFR	rs11650494	17q21.32	2e-09	1
NKX3-1	rs13272392	8p21.2	4e-34	4
NLGN3	rs4844289	Xq13.1	1e-09	1
NOL10	rs9287719	2p25.1	3e-08	1
NOTCH2	rs10923931	1p13-p11	0.008	1
NOTCH4	rs3096702	6p21.3	4.78x10-9	1
NR2F2	rs11637980 x rs1447295	15q26.2 x 8q24.21	2e-06	1
NSMCE2	rs7008482	NSMCE2	0.04	1
NUCKS1	rs823123	1q32.1	5e-13	1
NUDT10	rs5945619	Xp11.22-p11.1	1.89x10-4	3
NUDT11	rs5945619	Xp11.22-p11.1	1.5x10-9	2
OTUD7A	rs16956801	15q13.1	7.65x10-5	1
PARG	rs10993994	10q11.22	1e-15	1
PARK7	rs6703670	1p36.23	9.09x10-4	1
PDGFC	rs10023685	4q32.1	2e-09	1
PDLIM5	rs17021918	4q22	4.2x10-15	2
PEX14	rs636291	1p36.22	2e-08	1
PHF19	rs59482735	9q33.2	4e-09	1
PHF20L1	rs2472537	8q24.22	2.12x10-4	1
PHLPP2	rs12051443	16q22.2	3e-08	1
PIK3R1	rs706711	5q13.1	0.01	2
PKD1L3	rs12597458	16q22.2	1e-07	1
PKHD1	rs10498792	6p21.2-p12	3e-06	1
PKIA	rs2219968 x rs1571801	8q21.13 x 9q33.2	6e-07	1
PLCL1	rs13398206 x rs10896449	2q33.1 x 11q13.3	4e-06	1
PLEKHM3	rs6712527	2q33.3	3.76x10-4	1
POLR2E	rs3787016	19p13.3	7.22x10-7	1
POU5F1B	rs16901979	8q24.21	1e-16	2
POU5F1P1	rs6998061	8q24.21	0.001	1
PPF1BP2	rs12791447	11p15.4	4e-08	1
PPFIA2	rs10778826	12q21.31	0.006	1
PPFIBP2	rs12791447	11p15.4	4e-08	1
PRDM15	rs6586243	21q22.3	7.79x10-6	1
PRKAG2	rs11763144	7q35-q36	0.008	1
PRKCI	rs71277158	3q26.2	8e-14	3
PRNCR1	rs56005245	8q24.21	1e-08	1
PRPH	rs10875943	12q12-q13	6.9x10-12	1
PTGFRN	rs2806864	1p13.1	6e-07	1
PTPRU	rs1866967 x rs8102476	1p35.3 x 19q13.2	5e-06	1
RAB14	rs942152	9q32-q34.11	0.002	1
RACGAP1	rs615382	12q13	0.009	1
RAD23B	rs817826	9q31.2	5.45x10-14	1
RAD51B	rs7141529	14q23-q24.2	2.77x10-10	1
RAI2	rs16980679	Xp22.13	3e-15	1
RASA1	rs35148638	5q14.3	6.49x10-9	1
RFX6	rs339331	6q22.31	2e-12	2
RGS17	rs1933488	6q25.2	4e-18	1
RMST	rs75718479	12q23.1	1e-06	1
RNASE9	rs1243647 x rs12418451	14q11.2 x 11q13.3	1e-06	1
RNASEL	rs486907	1q25	0.004	3
RP1	rs80130819	12q13.11	2e-09	1
RRAGB	rs10855058	Xp11.21	1e-08	1
RSG17	rs1933488		4.34x10-18	1
RUVBL1	rs7641133	3q21	1.0x10-4	1
RXRA	rs3118536	9q34	0.02	1
SALL	rs7241993	16q12.1	2.19x10-9	1
SALL3	rs7241993	18q23	2e-09	2
SERPINA3	rs8023057	14q32.13	2e-15	1
SHROOM2	rs2405942	Xp22.2	2.37x10-10	1
SIDT1	rs7611694	3q13.31	3.80x10-13	1
SIX1	rs7153648	14q23.1	2e-09	1
SLC19A2	rs3765227	1q23.3	1.26x10-4	2
SLC22A1	rs4646284	6q25.3	1.3x10-23	2
SLC22A2	rs4646284G	6q25.3	1e-19	1
SLC22A3	rs4646284	6q25.3	3.2x10-52	4
SLC25A37	rs4614003	8p21.2	1e-15	2
SLC41A1	rs6679073	1q32.1	4e-15	2
SLC45A3	rs12409639	1q32.1	2.36x10-19	4
SLC7A	rs6625711	Xq13.1	6e-07	1
SNX16	rs13264970 x rs1571801	8q21.13 x 9q33.2	4e-06	1
SOX9	rs4793529	17q24.3	2e-13	1
SP8	rs12155172	7p21.2	4.95x10-13	1
SPATA16	rs11720607 x rs10486567	3q26.31 x 7p15.1	5e-06	1
SRRM1P1	rs6983267	8q24.21	4e-15	2
STAT3	rs744166	17q21	0.03	1
STMN3	rs6062509	20q13.33	4e-16	1
SULT2A1	rs182420	19q13.3	0.04	1
SYK	rs290258 x rs7679673	9q22.2 x 4q24	1e-06	1
TBX1	rs2238776	22q11.21	2e-08	1
TBX3	rs11067228	12q24.21	1e-14	1
TBX5	rs1270884	12q24.1	6.75x10-11	2
TCF2	rs7501939	17q12	2.78x10-20	4
TCF7L2	rs7903146	10q25.3	0.009	1
TERT	rs2242652	5p15.33	2.7x10-24	4
TET2	rs7679673	4q24	1.19x10-2	1
TH	rs7126629	11p15.5	2e-08	2
THADA	rs1465618	2p21	1.6x10-8	1
THEG5	rs11084596	19q12	1e-15	1
TIMM23	rs10763567	10q11.22	6e-10	1
TLR4	rs6478343	9q33.1	2e-08	1
TMPRSS2	rs1041449	21q22.3	3e-08	1
TMTC2	rs12317459	12q21.31 x 8q24.21	4e-06	1
TNC	rs7847271	9q33.1 x 3q21.3	4e-06	1
TNFSF10	rs3774315	3q26	0.002	1
TNRC6B	rs12628051	22q13.1 x 11p15.5	3e-06	1
TNS3	rs56232506	7p12.3	9e-09	1
TRIM31	rs115457135	6p22.1	1e-07	1
TRIM8	rs3850699	10q24.3	4.87x10-10	1
TSEN2	rs6766510	3p25.2 x 10q11.22	2e-06	1
TTC7A	rs10194115	2p16.3	5e-07	1
TTC9	rs8014671	14q24.2	3e-07	1
TTLL1	rs5759167	22q13.1	3.01x10-3	1
TUBA1	rs10875943	2q36.1	0.002	1
TXLNG	rs5969745	Xp22.2	3e-13	1
UPF2	rs10795917 x rs8102476	10p14 x 19q13.2	7e-07	1
VAMP8	RS10187424	2p12-p11.2	0.003	1
VDR	rs7975128	12q12-q14	0.02	2
VEGFA	rs6920449	6p21.1	6e-12	1
VGLL3	rs9757252 x rs17021918	3p12.1 x 4q22.3	5e-06	1
WDR11	rs10749415	10q26.13	9e-25	2
WDR52	rs7611694		4e-13	1
WWOX	rs11150069	16q23.3-q24.1	9.43x10-6	1
XAGE3	rs2807031	Xp11.22	3e-11	1
XYLT1	rs12918539	16p12	7.38x104	1
ZBTB38	rs1991431	3q23	3e-11	2
ZGPAT	rs6062509	20q13.3	3.57x10-16	1
ZNF280B	rs5751168 x rs7679673	22q11.22 x 4q24	4e-06	1
ZNF652	rs7210100	17q21.32	3.4x10-13	1
ZNF827	rs56935123	4q31.22	4e-09	2
