# Supplementary material for: Interactions between Germline and Somatic Mutated Genes in Aggressive Prostate Cancer
Source: Prostate Cancer. 2019 Mar 17;2019:4047680. doi: 10.1155/2019/4047680 (PMC6441536; doi:10.1155/2019/4047680)
Supplement: Supplementary Materials — Table S1B: list of significantly differentially expressed nonsomatic mutated genes associated with aggressive PCa along with estimates of P values, adjusted P values, and log fold change. Table SA: a comprehensive list of single nucleotide polymorphisms (herein called genetic variants). Table S1A: list of significantly differentially expressed somatic mutated genes associated with aggressive PCa. [file 4047680.f1.zip › TARUN_HICKS-PROJECT2-PCA-Table S1B-SUBMITTED.xlsx]

## Sheet: non_somatic_sign
Table S1B List of significantly differentially expressed non somatic mutated genes associated with aggressive PCa along with estimates of p-values, adjusted p-values and log fold change.
Genes	logFC	P.Value	adj.P.Val
C2orf88	-3.00596	7.44e-72	1.37e-67
PIK3C2G	-4.40111	1.15e-60	7.03e-57
MCF2	-3.37883	3.18e-56	1.17e-52
RAB9B	-2.20718	1.61e-54	3.58e-51
ASPA	-2.83945	1.49e-53	2.75e-50
QPRT	-2.29875	1.73e-53	2.9e-50
C8orf88	-2.51043	1.97e-53	3.03e-50
TMLHE	-2.09092	6.73e-53	8.85e-50
KY	-3.21568	1.43e-52	1.75e-49
PCP4L1	-2.92008	1.71e-51	1.97e-48
SBSPON	-2.4655	3.26e-51	3.54e-48
NECAB1	-2.25954	7.38e-51	7.15e-48
PHYHIPL	-2.41855	1.18e-50	1.09e-47
SERPINA5	-3.64811	4.68e-50	3.92e-47
ADAMTS9-AS1	-3.07915	5.5e-50	4.41e-47
APOBEC3C	-2.50719	9.62e-50	7.39e-47
COL4A6	-2.57495	1.36e-48	1e-45
PAK3	-2.43521	1.8e-48	1.27e-45
EFNB1	-1.44855	3.61e-47	2.29e-44
ACOX2	-2.23402	7.4e-47	4.54e-44
C15orf41	-1.46208	1.04e-46	6.2e-44
HPN	2.79788	1.87e-46	1.08e-43
SLC16A5	-2.32877	7.11e-46	3.74e-43
GPX2	-3.0341	1.17e-45	5.8e-43
RPE65	-4.1224	1.1e-45	5.63e-43
KCNJ15	-2.94929	2.33e-45	1.1e-42
GPRC5B	-1.84486	3.99e-45	1.84e-42
MARCKSL1	1.52811	1.02e-44	4.51e-42
GNAL	-1.79972	1.53e-44	6.55e-42
TMEM35A	-2.76149	1.62e-44	6.78e-42
PRDM11	-1.09068	1.87e-44	7.65e-42
LURAP1	-1.88742	4.33e-44	1.7e-41
RND2	-2.10779	5.5e-44	2.11e-41
CRTAC1	-2.67998	1.39e-43	5.11e-41
CPNE6	-3.74005	2.46e-43	8.57e-41
PRICKLE2	-1.74552	2.67e-43	9.13e-41
GATM	-1.6361	3.44e-43	1.11e-40
CYP3A5	-2.78967	4.22e-43	1.34e-40
HFE	-1.6513	5.48e-43	1.71e-40
NKAPL	-2.19929	6.18e-43	1.9e-40
MED21	-0.762133	2.64e-42	7.38e-40
ETNK2	-1.46931	3.54e-42	9.72e-40
ACTC1	-3.84927	6.08e-42	1.64e-39
ARL4D	-1.92109	6.41e-42	1.66e-39
RCBTB2	-1.04691	6.47e-42	1.66e-39
RHBDL3	-2.13382	6.44e-42	1.66e-39
EVX2	-3.25378	6.13e-42	1.64e-39
MAGI2-AS3	-1.70262	7.35e-42	1.83e-39
AC005180.2	-2.47855	1.07e-41	2.59e-39
AQP5	-2.89498	2.03e-41	4.86e-39
PPP1R3C	-2.01434	2.78e-41	6.56e-39
SNCG	-2.18881	4.84e-41	1.11e-38
HSPA4L	-1.72155	1.59e-40	3.53e-38
HOXD13	-2.47362	1.82e-40	3.94e-38
SIM2	2.89182	2.08e-40	4.41e-38
RBFOX3	-2.86927	2.31e-40	4.77e-38
RBMS3	-1.63124	2.49e-40	5.1e-38
AL109976.1	-2.21822	7.7e-40	1.54e-37
PNMT	-3.23772	1.24e-39	2.46e-37
CAMK2G	-0.980625	2.1e-39	4.07e-37
AC012085.2	-2.4902	2.27e-39	4.35e-37
MYOCD	-2.44078	2.64e-39	5.01e-37
CAV2	-1.69583	2.94e-39	5.52e-37
SOX15	-1.82369	4.04e-39	7.45e-37
BOLA3-AS1	-1.45562	4.45e-39	8.12e-37
PRKCB	-2.14261	6.44e-39	1.16e-36
TMEM252	-3.06042	7.3e-39	1.31e-36
DUSP19	-1.20652	1.01e-38	1.76e-36
GSTM4	-1.49575	1.01e-38	1.76e-36
GAS1RR	-2.21359	1.11e-38	1.92e-36
ADAMTS9-AS2	-2.05492	1.18e-38	2.01e-36
CYP4B1	-2.86945	1.3e-38	2.19e-36
MICALL1	-0.926035	1.8e-38	3.02e-36
AL031587.5	-1.16176	2.26e-38	3.72e-36
SLITRK6	-2.21369	2.55e-38	4.16e-36
CTF1	-1.78867	2.58e-38	4.17e-36
FAXDC2	-1.83182	3.75e-38	6e-36
TMEM132C	-2.76385	5e-38	7.95e-36
HIF3A	-2.29175	8.25e-38	1.3e-35
FRMD6	-1.86563	8.46e-38	1.32e-35
AC005180.1	-2.52892	1.24e-37	1.88e-35
RAB11FIP2	-1.05951	1.22e-37	1.87e-35
CNTFR	-2.31729	1.63e-37	2.42e-35
C15orf59	-1.73016	1.6e-37	2.42e-35
LINC00908	-2.2147	1.62e-37	2.42e-35
FBXO17	-1.8508	1.81e-37	2.66e-35
PABPC1P4	-1.63025	1.91e-37	2.79e-35
EMX2OS	-3.3069	2.37e-37	3.41e-35
FAM107A	-2.19212	2.36e-37	3.41e-35
PGM5-AS1	-3.123	2.73e-37	3.85e-35
PDZRN4	-2.10603	2.74e-37	3.85e-35
RNF180	-1.16237	2.73e-37	3.85e-35
ANXA2P2	-1.66098	2.89e-37	4.03e-35
DOK4	-1.27248	3.66e-37	5.03e-35
AFAP1L2	-1.61792	4.15e-37	5.67e-35
PENK	-3.1252	4.62e-37	6.26e-35
C20orf194	-1.25216	5.07e-37	6.82e-35
SCARA3	-1.94541	5.68e-37	7.58e-35
AC084880.1	-1.96968	6.82e-37	9.04e-35
DUOXA1	-2.76256	7.63e-37	1e-34
SBK1	1.64395	7.98e-37	1.04e-34
RMDN2	-0.788458	8.47e-37	1.1e-34
AC092376.2	-2.07769	9.6e-37	1.24e-34
EYA4	-2.04466	1.42e-36	1.8e-34
ULK3	1.03061	1.41e-36	1.8e-34
TSPAN18	-1.84588	1.87e-36	2.37e-34
CSRNP3	-1.92575	2.34e-36	2.93e-34
SLC25A12	-0.745599	2.48e-36	3.09e-34
MAT2B	-0.750328	3.29e-36	4.06e-34
PRR36	2.09565	3.7e-36	4.54e-34
PLBD1	-1.48048	3.79e-36	4.63e-34
SLC39A2	-4.06843	4.89e-36	5.89e-34
EZH2	1.63515	5.43e-36	6.5e-34
DPT	-2.76037	5.64e-36	6.7e-34
HOGA1	-2.10734	6.76e-36	7.98e-34
ZNF185	-1.98085	8.98e-36	1.05e-33
FAM212B	-1.07533	1.03e-35	1.18e-33
ALDH1A2	-2.03609	9.52e-36	1.1e-33
G0S2	-1.7675	1.08e-35	1.23e-33
PCDH7	-2.25204	1.19e-35	1.35e-33
ZNF204P	-1.96633	1.37e-35	1.55e-33
FAM46B	-2.18287	1.55e-35	1.72e-33
SNAI2	-1.97912	1.53e-35	1.71e-33
RAB7B	-1.61896	1.74e-35	1.9e-33
PLLP	-1.33882	1.72e-35	1.89e-33
NHS	-1.59382	2.08e-35	2.24e-33
NPY6R	-3.14005	2.14e-35	2.29e-33
QSOX2	0.921599	2.61e-35	2.76e-33
PIPOX	-1.42984	2.92e-35	3.06e-33
JAZF1-AS1	-2.26746	2.61e-35	2.76e-33
ST6GALNAC2	-1.74509	3.11e-35	3.23e-33
LMO3	-2.13194	3.35e-35	3.45e-33
CDC42EP4	-1.07766	3.28e-35	3.4e-33
LDB3	-2.42483	3.6e-35	3.68e-33
SLMAP	-1.12682	3.74e-35	3.81e-33
CD300LG	-2.67156	4.04e-35	4.09e-33
ANO5	-2.13869	4.48e-35	4.49e-33
LCA5	-1.22679	6.21e-35	6.12e-33
ARHGEF26	1.69129	6.91e-35	6.77e-33
INPP5F	-0.771385	7.61e-35	7.42e-33
MBNL1-AS1	-1.45264	8.38e-35	8.13e-33
SAMD12	-1.95223	1.02e-34	9.77e-33
GNL3	0.898783	1.16e-34	1.1e-32
PRKG1	-1.77928	1.38e-34	1.3e-32
ME1	-1.69509	1.61e-34	1.5e-32
SCN2B	-2.26636	2.06e-34	1.87e-32
AC087499.1	-2.09397	1.95e-34	1.8e-32
PLCD1	-0.82127	2e-34	1.83e-32
LINC00857	-1.71811	2.06e-34	1.87e-32
PLAG1	-1.81921	2.27e-34	2.05e-32
HCG11	-1.52574	2.28e-34	2.05e-32
MYZAP	-1.73712	2.44e-34	2.18e-32
PIP5K1B	-1.7373	2.63e-34	2.34e-32
POPDC2	-1.68274	2.82e-34	2.49e-32
ID4	-2.07841	2.83e-34	2.49e-32
FEZ1	-1.39374	3.07e-34	2.68e-32
APOBEC3G	-1.72194	3.3e-34	2.87e-32
C12orf75	-1.63562	3.07e-34	2.68e-32
LRFN1	1.62831	4.06e-34	3.5e-32
GATA3	-2.36268	4.02e-34	3.48e-32
SNX7	-1.30259	4.89e-34	4.18e-32
JAZF1	-1.53574	5.16e-34	4.38e-32
SLC2A5	-2.67367	5.54e-34	4.64e-32
LARGE1	-1.23671	5.27e-34	4.44e-32
NDRG4	-1.6892	6.38e-34	5.32e-32
RIMS3	-1.39353	6.55e-34	5.44e-32
LPAR1	-1.49399	8.02e-34	6.63e-32
PDE7B	-1.48223	1.1e-33	8.91e-32
	-1.32062	1.06e-33	8.74e-32
PAK5	-2.60807	1.1e-33	8.91e-32
NT5E	-1.57734	1.09e-33	8.91e-32
SLC19A1	1.45414	1.32e-33	1.06e-31
SOSTDC1	-2.48513	1.51e-33	1.19e-31
TCF7L1	-1.39634	1.42e-33	1.12e-31
B3GALT2	-2.20853	1.73e-33	1.35e-31
PLCL1	-2.02029	1.69e-33	1.32e-31
MR1	-1.43668	2.03e-33	1.57e-31
STK26	-1.31798	2.29e-33	1.76e-31
C3orf70	-1.69284	2.58e-33	1.94e-31
DAAM2	-1.90928	2.55e-33	1.93e-31
AC073343.1	-1.41715	2.59e-33	1.94e-31
SLC47A1	-1.72979	2.94e-33	2.18e-31
ALDH1L2	-1.85292	3.09e-33	2.28e-31
AL031123.2	2.41171	2.59e-33	1.94e-31
ANGPTL1	-2.288	4.29e-33	3.12e-31
PCAT7	2.96111	3.45e-33	2.54e-31
UBXN10-AS1	-2.67782	4.36e-33	3.17e-31
CAPN6	-2.78896	4.52e-33	3.27e-31
KCNIP3	-1.49695	5.55e-33	3.98e-31
VAV2	0.861962	5.05e-33	3.63e-31
MAL	-2.49133	6.62e-33	4.73e-31
KIAA1161	-1.38535	7.91e-33	5.59e-31
CFL2	-1.46597	7.67e-33	5.44e-31
MGAT4B	0.79235	8.27e-33	5.81e-31
TCEAL2	-2.10617	1.02e-32	7.15e-31
SNAP25	-2.14804	1.13e-32	7.86e-31
PARD6G	-0.814508	1.32e-32	9.11e-31
KIAA1210	-2.9373	1.52e-32	1.05e-30
AP001107.5	-2.26678	1.66e-32	1.13e-30
ARHGEF38	1.89157	1.73e-32	1.17e-30
CACHD1	-1.58751	1.89e-32	1.27e-30
PGRMC1	-0.930418	1.84e-32	1.24e-30
TSLP	-2.11133	2.23e-32	1.47e-30
GPR161	-1.49181	2.02e-32	1.35e-30
MRAP2	-1.52264	2.28e-32	1.5e-30
PLEKHG3	-1.14081	2.22e-32	1.47e-30
FOXP4-AS1	2.29438	2.09e-32	1.39e-30
LPCAT2	-1.43792	3.13e-32	2.04e-30
SDCCAG3	0.845762	3.73e-32	2.42e-30
GPM6B	-1.38021	3.77e-32	2.44e-30
KATNAL1	-1.10101	4.11e-32	2.64e-30
IP6K3	-2.74568	4.64e-32	2.96e-30
LIX1	-3.26448	4.65e-32	2.96e-30
ABCG2	-1.72368	4.98e-32	3.16e-30
PODXL2	1.66473	5.65e-32	3.58e-30
CLIP4	-1.36795	5.97e-32	3.77e-30
EDN3	-3.07863	8.15e-32	5.11e-30
AC036108.3	-1.82862	8.96e-32	5.58e-30
DNAJB5	-1.58027	7.88e-32	4.96e-30
KCNJ3	-2.79693	9.81e-32	6.09e-30
TMEM108	-2.05681	1.12e-31	6.88e-30
ARMCX1	-1.87615	1.1e-31	6.78e-30
NKX2-3	5.07539	8.21e-32	5.13e-30
RARB	-1.0596	1.28e-31	7.87e-30
NYAP1	-1.57146	1.51e-31	9.2e-30
PARVA	-0.875493	1.38e-31	8.47e-30
LONRF3	-1.82516	1.66e-31	1e-29
CYP11A1	-2.41179	1.61e-31	9.72e-30
ANO6	-1.53474	1.52e-31	9.2e-30
RAB17	1.63837	1.68e-31	1e-29
NDP	-2.29872	1.9e-31	1.13e-29
CAV1	-1.96036	1.67e-31	1e-29
ARHGAP23	-1.60768	1.93e-31	1.15e-29
ATP1A2	-2.489	2.02e-31	1.19e-29
HOXC6	4.18139	2.25e-31	1.32e-29
FAM124A	-1.54532	2.46e-31	1.42e-29
SNHG18	-2.05129	2.44e-31	1.41e-29
C16orf45	-1.35795	2.27e-31	1.32e-29
SLCO3A1	-1.39175	2.89e-31	1.65e-29
TMEM237	-0.753548	2.92e-31	1.67e-29
FXYD6	-1.82697	3.14e-31	1.78e-29
BNIPL	-2.02761	4.02e-31	2.28e-29
BHMT2	-1.74904	4.05e-31	2.28e-29
S100A14	-2.73702	4.16e-31	2.34e-29
KITLG	-1.43156	4.03e-31	2.28e-29
GPM6A	-2.21152	4.99e-31	2.77e-29
C19orf48	1.66915	4.3e-31	2.41e-29
ST5	-1.3534	4.99e-31	2.77e-29
AVPI1	-1.33553	5.58e-31	3.07e-29
SEC14L6	-1.99543	6.87e-31	3.77e-29
FOXI1	-4.02137	7.36e-31	4.03e-29
PRIMA1	-1.97229	7.89e-31	4.3e-29
FBXO30	-0.947952	8.54e-31	4.63e-29
ANO1	-1.79465	8.54e-31	4.63e-29
VWA5A	-1.55315	9.23e-31	4.99e-29
KLF8	-1.30698	1.08e-30	5.78e-29
TRO	-1.49266	1.07e-30	5.73e-29
CHP2	-3.2461	1.11e-30	5.93e-29
DGKG	-1.98891	1.17e-30	6.21e-29
FEM1B	-0.654598	9.93e-31	5.35e-29
NLGN3	-1.58974	1.17e-30	6.21e-29
GLIS1	-2.02619	1.48e-30	7.78e-29
B3GNT8	-1.7395	1.56e-30	8.15e-29
PINLYP	-1.48193	1.56e-30	8.15e-29
SH3GLB1	-0.59913	1.31e-30	6.91e-29
PRDM5	-1.25342	1.54e-30	8.09e-29
WWC3	-0.931912	1.41e-30	7.46e-29
SPATA18	-1.76461	1.66e-30	8.64e-29
PGF	-1.64348	1.76e-30	9.13e-29
RGN	-1.64909	1.77e-30	9.16e-29
LINC01018	-2.28878	1.89e-30	9.73e-29
RAP1GAP	1.71498	1.75e-30	9.07e-29
EID3	-1.39112	2.37e-30	1.22e-28
CYP2T1P	-1.59774	2.43e-30	1.24e-28
PGR	-1.85684	2.32e-30	1.19e-28
HPD	-1.80491	2.72e-30	1.38e-28
PITPNM3	-1.29987	2.48e-30	1.26e-28
	-2.2405	2.96e-30	1.5e-28
SCPEP1	-1.0393	2.65e-30	1.34e-28
SMIM10	-1.51637	3.25e-30	1.62e-28
LYVE1	-2.12106	3.41e-30	1.68e-28
HACD1	-1.41189	3.44e-30	1.69e-28
MFN2	-0.616509	3.07e-30	1.54e-28
SGCB	-1.17984	3.06e-30	1.54e-28
C11orf45	-1.70877	4.22e-30	2.06e-28
HSPB8	-2.55871	3.72e-30	1.82e-28
ZNF90	-1.71374	5.03e-30	2.43e-28
SEC23A	-1.11973	4.22e-30	2.06e-28
EOGT	-0.960331	4.83e-30	2.35e-28
TRHDE	-2.13023	7.01e-30	3.36e-28
BNIP2	-0.696097	6.81e-30	3.27e-28
LRCH2	-1.75002	8.24e-30	3.93e-28
CBX8	1.18982	9.34e-30	4.44e-28
C16orf74	-1.75465	9.52e-30	4.51e-28
FGF10	-2.39409	1.02e-29	4.81e-28
COLCA2	-1.12099	1.02e-29	4.81e-28
ASB2	-1.87552	1.11e-29	5.19e-28
ZNF663P	-1.99906	1.33e-29	6.13e-28
GPR156	-1.5443	1.27e-29	5.93e-28
PLP2	-1.38708	1.15e-29	5.4e-28
PJA1	-0.827622	1.21e-29	5.66e-28
NPR2	-1.2199	1.48e-29	6.83e-28
SCGB3A1	-2.9846	1.65e-29	7.6e-28
CCDC181	-1.37731	1.99e-29	9.11e-28
HPN-AS1	2.99044	1.32e-29	6.12e-28
ENTPD3	-1.48622	2.02e-29	9.23e-28
MSL3P1	1.40169	2.36e-29	1.07e-27
ADGRB3	-2.0454	2.62e-29	1.18e-27
ICA1	0.937145	2.25e-29	1.02e-27
DCUN1D4	-0.570714	2.39e-29	1.08e-27
SPTBN2	1.1642	2.36e-29	1.07e-27
CPLX1	1.61298	2.96e-29	1.31e-27
AP4S1	-0.556357	2.88e-29	1.28e-27
GPRASP1	-1.41921	2.63e-29	1.18e-27
PRRG4	-1.45933	2.61e-29	1.18e-27
PCAT29	2.63797	2.87e-29	1.28e-27
NDRG2	-1.43355	3.1e-29	1.37e-27
TRIM6	-1.51932	3.77e-29	1.65e-27
AF165147.1	-2.18053	3.7e-29	1.62e-27
SPRY2	-0.993989	3.58e-29	1.57e-27
COL23A1	-1.80221	4.37e-29	1.9e-27
HMGCLL1	-2.44864	5.37e-29	2.32e-27
DNAJC18	-0.792254	5.45e-29	2.35e-27
NUDT10	-1.66939	5.43e-29	2.34e-27
AKR1B1	-1.77211	5.67e-29	2.44e-27
KPNA3	-0.869044	5.83e-29	2.5e-27
CRYAB	-2.10795	6.11e-29	2.61e-27
TPRXL	-2.24575	6.98e-29	2.97e-27
CAND2	-1.40797	7.54e-29	3.19e-27
AL049555.1	-2.57025	8.54e-29	3.58e-27
GSTP1	-2.2279	7.92e-29	3.34e-27
RGS22	-1.61034	9.68e-29	4.03e-27
AJUBA	-1.30343	8.61e-29	3.61e-27
CLU	-2.24664	9.32e-29	3.9e-27
GALR1	-2.6173	1.08e-28	4.45e-27
PRNP	-0.967686	9.77e-29	4.05e-27
BNIP3L	-0.895144	1.14e-28	4.7e-27
FGF14-AS2	-1.84978	1.45e-28	5.94e-27
NRK	-2.24098	1.48e-28	6.06e-27
CLIC6	-1.73712	1.63e-28	6.64e-27
TMEM120B	0.955006	1.72e-28	7e-27
TOR1AIP1	-0.793408	1.56e-28	6.37e-27
P2RX6	-2.05498	1.97e-28	7.94e-27
AC015922.3	-1.62344	2.14e-28	8.62e-27
TRAF4	1.01885	1.77e-28	7.18e-27
EIF1B-AS1	-1.07528	2.32e-28	9.27e-27
KCNJ8	-1.45587	2.3e-28	9.21e-27
SLC25A22	1.08264	2.22e-28	8.91e-27
PYGM	-1.97102	2.47e-28	9.84e-27
PCYT1B	-2.09344	2.92e-28	1.15e-26
ESRP2	1.13747	2.42e-28	9.64e-27
GPLD1	-1.40111	3.03e-28	1.2e-26
TMEM37	-1.54702	3.29e-28	1.3e-26
STX19	2.03462	3.49e-28	1.36e-26
AP002884.3	-1.52927	3.67e-28	1.43e-26
CMTM5	-2.2942	3.59e-28	1.4e-26
WBP4	-0.632885	3.48e-28	1.36e-26
IRAK3	-1.3519	3.71e-28	1.44e-26
ILK	-1.03009	3.39e-28	1.33e-26
CLIP3	-1.59283	3.75e-28	1.45e-26
LINC01679	-1.7696	4.71e-28	1.81e-26
AL356599.1	-1.15827	4.86e-28	1.86e-26
ANP32E	-1.14852	4.17e-28	1.61e-26
RBBP8	-0.778651	4.31e-28	1.66e-26
HAAO	-1.56692	4.88e-28	1.86e-26
CYP4F22	-2.57725	5.98e-28	2.26e-26
HLF	-1.49138	5.06e-28	1.93e-26
MECOM	-1.42249	5.44e-28	2.06e-26
CXorf57	-1.81951	6.4e-28	2.41e-26
FAM13B	-0.840551	5.31e-28	2.02e-26
AF111167.2	-1.35397	6.84e-28	2.57e-26
TROAP	2.25825	7.12e-28	2.67e-26
TPM1	-1.51386	7.16e-28	2.68e-26
ACOT11	-1.52235	8.2e-28	3.05e-26
DIXDC1	-1.23856	7.36e-28	2.75e-26
EIF4EBP2	-0.654386	7.78e-28	2.9e-26
ZBTB7C	-1.60871	8.99e-28	3.33e-26
OGFRL1	-0.894841	8.62e-28	3.2e-26
YPEL1	1.28876	1.29e-27	4.78e-26
MEIS1	-1.4804	1.08e-27	4.01e-26
ADCYAP1R1	-2.3273	1.39e-27	5.11e-26
KIAA1644	-1.96911	1.54e-27	5.59e-26
P2RY2	-1.98047	1.67e-27	6.08e-26
FAM83H	1.04363	1.36e-27	5.01e-26
ATRNL1	-1.8944	1.7e-27	6.14e-26
CALM1	-0.887889	1.5e-27	5.49e-26
GALNT9	-2.07169	1.73e-27	6.23e-26
SKA3	2.02915	1.9e-27	6.83e-26
VSNL1	-2.55707	2.03e-27	7.25e-26
GDF10	-2.5407	1.99e-27	7.12e-26
PKP3	1.02763	1.69e-27	6.12e-26
CENPA	2.57307	1.94e-27	6.97e-26
TES	-1.06915	2.02e-27	7.23e-26
ALDH3A1	-2.24674	2.84e-27	9.95e-26
UNC5B	-1.57094	2.53e-27	8.97e-26
ARHGEF9	-0.706965	2.57e-27	9.06e-26
FGF2	-1.52647	2.83e-27	9.95e-26
MEIS2	-1.76321	2.65e-27	9.32e-26
GLCE	-0.755566	2.8e-27	9.83e-26
TAF3	-0.56504	3.18e-27	1.11e-25
LAPTM4A	-0.669493	3.27e-27	1.13e-25
KCNMB1	-1.97431	3.12e-27	1.09e-25
CAMKK2	1.5205	3.18e-27	1.11e-25
NTF3	-1.63601	4e-27	1.38e-25
TRPC6	-1.62823	4.31e-27	1.48e-25
ACSF2	-1.58688	3.68e-27	1.27e-25
MFSD2A	-2.19021	4.76e-27	1.61e-25
DSE	-1.01863	4.16e-27	1.43e-25
DBNDD2	-1.3692	4.97e-27	1.68e-25
KIT	-1.63612	4.62e-27	1.58e-25
PCGF3	0.624427	4.13e-27	1.42e-25
AL031985.3	1.10352	5.33e-27	1.79e-25
SLC2A4	-1.88549	4.98e-27	1.68e-25
FOLH1	2.62211	4.61e-27	1.57e-25
2018-09-10	-0.815579	4.73e-27	1.61e-25
MTMR8	-1.61339	6.17e-27	2.07e-25
ABO	-2.24952	5.88e-27	1.97e-25
PPP1R1A	-2.11302	6.77e-27	2.26e-25
SOX7	-1.40247	7.11e-27	2.36e-25
CGREF1	2.23821	7.24e-27	2.4e-25
HECTD2	-0.978954	6.44e-27	2.15e-25
CEND1	-1.91907	8.07e-27	2.66e-25
WDR1	-0.599254	7.37e-27	2.43e-25
ALAD	-0.991058	7.11e-27	2.36e-25
MRO	-1.76878	8.94e-27	2.91e-25
USP44	-1.51571	9.15e-27	2.97e-25
CDHR1	-1.949	9.86e-27	3.18e-25
GAS1	-1.68277	8.47e-27	2.77e-25
DUSP3	-0.784906	8.23e-27	2.7e-25
CDKL1	-1.28497	1.05e-26	3.38e-25
TTC28	-1.11128	8.66e-27	2.83e-25
LGI3	-2.08758	1.11e-26	3.54e-25
KCTD9	-0.86086	9.04e-27	2.94e-25
CBX7	-0.958729	8.86e-27	2.89e-25
CRYZ	-0.952508	9.18e-27	2.97e-25
ITGB8	-1.65281	9.41e-27	3.04e-25
GIPC2	-1.52165	1.22e-26	3.87e-25
SRRM2-AS1	1.52177	1.24e-26	3.91e-25
LINC01410	-1.65434	1.24e-26	3.91e-25
RTL5	-1.05353	1.12e-26	3.59e-25
EPHA2	-1.67368	1.07e-26	3.44e-25
MEX3D	0.886176	1.13e-26	3.62e-25
TMEM200B	-1.58667	1.16e-26	3.68e-25
GLIS3	-1.44913	1.2e-26	3.82e-25
MYBL2	2.59871	1.33e-26	4.17e-25
AC006042.1	1.68562	1.37e-26	4.3e-25
AFF2	-1.9413	1.43e-26	4.49e-25
SEMA3A	-1.92891	1.46e-26	4.57e-25
TCEAL1	-0.614632	1.27e-26	4e-25
BEND5	-1.32167	1.7e-26	5.3e-25
ITPRIPL1	-1.82844	2.12e-26	6.56e-25
CDCA8	1.39849	2.14e-26	6.62e-25
LINC00665	1.12141	1.84e-26	5.73e-25
AC104667.2	2.50994	2.21e-26	6.81e-25
TCN2	-1.06895	2.01e-26	6.25e-25
CD200	-1.39915	2.33e-26	7.15e-25
RBFOX2	-0.713155	2.27e-26	6.97e-25
LRRC37A7P	-1.70297	2.89e-26	8.78e-25
RBM38	-1.07008	2.47e-26	7.53e-25
DYNC1I1	-1.40238	2.91e-26	8.83e-25
RAB38	-1.5715	3.2e-26	9.65e-25
FOLR1	-2.56044	3.58e-26	1.07e-24
DZIP1	-1.2477	3.14e-26	9.5e-25
NRG1	-2.10273	3.73e-26	1.11e-24
NIPAL4	-2.08391	3.85e-26	1.14e-24
FUT10	-0.879988	3.9e-26	1.16e-24
SSPN	-1.34327	3.28e-26	9.88e-25
E2F5	1.03045	3.96e-26	1.17e-24
TMEM19	-0.618665	3.44e-26	1.03e-24
AC015845.2	-2.23079	4.18e-26	1.23e-24
SVIL	-1.51052	3.55e-26	1.06e-24
KIF4A	2.36112	4.38e-26	1.29e-24
NEURL1B	-1.20917	3.85e-26	1.14e-24
PSIP1	-0.753655	4.06e-26	1.2e-24
C20orf166-AS1	-2.0935	5.45e-26	1.59e-24
PPP1R12A	-0.905566	4.45e-26	1.31e-24
PARP3	-0.856866	4.72e-26	1.38e-24
ZNF454	-1.41268	5.9e-26	1.71e-24
HACD4	-1.23022	5.65e-26	1.64e-24
ADGRL3	-1.97074	6.13e-26	1.77e-24
CRABP2	-1.96814	5.12e-26	1.5e-24
TNK2	0.957908	5.21e-26	1.52e-24
AC018413.1	-1.7363	6.75e-26	1.93e-24
FGFRL1	1.52978	5.64e-26	1.64e-24
FOXO1	-0.893478	5.92e-26	1.71e-24
CERK	-1.19434	6.18e-26	1.78e-24
SLC26A6	1.33678	7.02e-26	2.01e-24
PIK3R1	-1.14011	6.17e-26	1.78e-24
C9orf163	2.02715	6.73e-26	1.93e-24
WFDC2	-2.77114	6.41e-26	1.84e-24
TRPC1	-1.25804	7.58e-26	2.15e-24
ASXL3	-1.77845	8.65e-26	2.43e-24
KCNS1	-2.86917	9.02e-26	2.52e-24
ADCY5	-1.62189	7.11e-26	2.02e-24
CAVIN2	-1.60171	7.19e-26	2.05e-24
CDC25C	2.21398	8.33e-26	2.35e-24
CCDC89	-1.53364	9.8e-26	2.74e-24
SEC16A	0.796023	8.32e-26	2.35e-24
RGS7BP	-2.00001	1.04e-25	2.89e-24
GAS6-AS2	-1.30151	1.16e-25	3.23e-24
CRIP3	-1.97068	1.19e-25	3.32e-24
EMILIN3	-1.49575	1.15e-25	3.21e-24
MGARP	-1.49065	1.28e-25	3.55e-24
TLR3	-1.35976	1.27e-25	3.52e-24
ACSL4	-1.23106	1.19e-25	3.3e-24
SPDEF	1.83539	1.31e-25	3.61e-24
CEP120	-0.654052	1.33e-25	3.68e-24
AC093297.2	-1.12254	1.74e-25	4.76e-24
MELK	2.21575	1.74e-25	4.75e-24
C16orf59	1.52445	1.91e-25	5.21e-24
LETM1	0.683024	1.51e-25	4.14e-24
AC008669.1	-0.954405	1.95e-25	5.32e-24
AC007906.2	-2.36456	1.97e-25	5.34e-24
SMIM10L2B	-1.4092	2.16e-25	5.82e-24
EFS	-1.76702	1.98e-25	5.37e-24
EPCAM	1.16353	2.04e-25	5.51e-24
RNF165	-1.78266	2.54e-25	6.82e-24
KCNB1	-1.62621	2.53e-25	6.81e-24
PRELID2	-1.24237	2.79e-25	7.46e-24
NUDT19	0.731889	2.3e-25	6.2e-24
TP63	-2.89143	2.48e-25	6.68e-24
ERGIC1	0.829722	2.93e-25	7.8e-24
C14orf37	-1.33861	3.68e-25	9.67e-24
CSK	0.563922	2.89e-25	7.72e-24
ANKRD65	-1.28416	3.2e-25	8.45e-24
LRIG1	1.04225	3.05e-25	8.07e-24
CERS4	1.03388	3.07e-25	8.13e-24
CORO2B	-1.37445	4.11e-25	1.08e-23
ARHGEF40	-1.09086	3.28e-25	8.65e-24
PDE4A	-1.1905	3.55e-25	9.35e-24
GRK2	0.687061	3.79e-25	9.96e-24
IQANK1	1.40353	4.18e-25	1.09e-23
CWF19L2	-0.569187	4.18e-25	1.09e-23
C5orf34	-0.950196	5.61e-25	1.45e-23
PDGFC	-1.36187	4.51e-25	1.17e-23
PLK1	1.69826	6.03e-25	1.55e-23
POLR2H	0.878984	4.97e-25	1.29e-23
INAVA	-2.00777	6.24e-25	1.6e-23
GPR160	1.25759	5.8e-25	1.49e-23
LINC01138	1.18561	7.43e-25	1.89e-23
METTL7A	-1.31323	6.51e-25	1.67e-23
VAMP3	-0.488634	6.41e-25	1.64e-23
SPOCK3	-1.9908	6.62e-25	1.69e-23
PDPN	-1.40548	7.49e-25	1.9e-23
STX12	-0.459051	7.37e-25	1.88e-23
DLGAP5	2.28061	9.36e-25	2.36e-23
SLC52A1	-2.13808	9.79e-25	2.45e-23
TINAGL1	-1.38295	7.52e-25	1.91e-23
PAQR7	-1.01499	8.21e-25	2.08e-23
TMEM117	-0.712334	9.25e-25	2.33e-23
	2.22542	9.83e-25	2.46e-23
LEPROT	-0.571534	7.78e-25	1.97e-23
AC004846.1	-1.55326	1.02e-24	2.54e-23
RGS10	1.22893	8.2e-25	2.08e-23
SAMD10	1.01171	9.81e-25	2.46e-23
TBL1X	-0.757363	8.33e-25	2.1e-23
CLVS2	-2.29796	1.08e-24	2.69e-23
ZBTB4	-0.6533	9.57e-25	2.41e-23
GJB4	-2.52319	1.3e-24	3.21e-23
AC107959.1	-1.2434	1.33e-24	3.28e-23
FOXM1	1.74875	1.34e-24	3.31e-23
PGM5	-2.4548	1.1e-24	2.73e-23
ITGB3	-1.7565	1.41e-24	3.47e-23
IQGAP3	2.11482	1.48e-24	3.64e-23
SLC51B	-1.55448	1.5e-24	3.67e-23
RHOBTB2	-0.841364	1.27e-24	3.14e-23
ZNF660	-1.14629	1.62e-24	3.94e-23
RAB40A	-1.54504	1.7e-24	4.13e-23
METTL24	-1.82404	1.84e-24	4.46e-23
UBE2C	2.39783	1.84e-24	4.46e-23
DAPL1	-3.08471	2.04e-24	4.92e-23
NCS1	-1.23823	1.56e-24	3.81e-23
ADRA2B	-1.53949	2.08e-24	5e-23
TENM2	-1.68174	1.98e-24	4.76e-23
CHST3	-1.31213	1.75e-24	4.25e-23
JPT2	0.662374	1.76e-24	4.27e-23
MSRB3	-1.7402	1.81e-24	4.39e-23
XKR5	-1.77926	2.35e-24	5.63e-23
CEP68	-0.739211	1.84e-24	4.46e-23
PPP3CB	-0.499501	1.91e-24	4.61e-23
EVA1A	-1.53838	2.59e-24	6.16e-23
REPIN1	0.643448	2.06e-24	4.95e-23
PLEKHA1	-0.680833	2.18e-24	5.22e-23
MYO19	0.770593	2.48e-24	5.9e-23
TTC23	-0.640343	2.4e-24	5.74e-23
STXBP5L	-1.91746	2.9e-24	6.86e-23
CKM	-3.26276	3.06e-24	7.24e-23
SOX5	-1.43799	3.42e-24	8.04e-23
KAT2A	0.993499	2.65e-24	6.29e-23
DERA	-0.624188	2.86e-24	6.77e-23
GSC	1.95507	3.69e-24	8.66e-23
DLX2	4.6194	3.23e-24	7.61e-23
RAP1A	-0.630177	3.14e-24	7.41e-23
SNHG3	1.6183	3.85e-24	9.03e-23
AC023024.2	1.5775	4.01e-24	9.39e-23
C8orf31	-1.46215	5.16e-24	1.2e-22
CDKN2AIP	-0.480425	4.13e-24	9.67e-23
PIMREG	1.98322	5.29e-24	1.23e-22
PCSK7	-0.863436	4.16e-24	9.71e-23
AP000696.1	2.78152	5.28e-24	1.22e-22
AC022893.1	-1.32896	5.71e-24	1.31e-22
LIPE	-1.07512	5.66e-24	1.31e-22
LRRC56	1.22344	6.11e-24	1.4e-22
PTPN14	-1.02201	4.86e-24	1.13e-22
CRNDE	1.42912	6.31e-24	1.44e-22
SLC24A3	-1.39694	5.31e-24	1.23e-22
TMEM51	-0.879942	5.71e-24	1.31e-22
LRRC34	-0.998911	7.03e-24	1.6e-22
AC096745.2	-1.75052	7.05e-24	1.6e-22
LINC00675	-2.36673	7.29e-24	1.65e-22
DPH3	-0.509618	5.81e-24	1.33e-22
CASKIN1	1.76773	7.9e-24	1.77e-22
B4GALT6	-1.00554	7.1e-24	1.61e-22
AP002761.4	-2.09539	8.45e-24	1.88e-22
PHYHIP	-1.66489	7.63e-24	1.72e-22
FAM162B	-1.41931	8.86e-24	1.97e-22
VCL	-1.51437	7.03e-24	1.6e-22
LRRK2	-1.40383	8.03e-24	1.8e-22
MIR100HG	-1.41209	7.34e-24	1.66e-22
RRM2	2.31436	9.24e-24	2.05e-22
SPART	-1.35851	7.2e-24	1.63e-22
BVES	-1.41234	8.26e-24	1.84e-22
A2M-AS1	-0.929941	1.04e-23	2.3e-22
FHOD3	-1.49145	8.08e-24	1.81e-22
CDC20P1	-1.57915	1.04e-23	2.3e-22
RND3	-1.57881	8.11e-24	1.81e-22
ITIH5	-1.51215	8.49e-24	1.89e-22
IQSEC3	-1.79125	1.12e-23	2.48e-22
CDCA5	1.60703	1.15e-23	2.53e-22
MAML2	-1.29839	8.9e-24	1.98e-22
STK33	-1.54142	1.15e-23	2.53e-22
GRAMD1A	0.725367	1.04e-23	2.3e-22
TCEAL7	-1.42724	1.47e-23	3.22e-22
GPX7	-1.37439	1.43e-23	3.15e-22
KRT13	-3.61445	1.48e-23	3.25e-22
PPP1R14B	1.35816	1.39e-23	3.05e-22
AC004967.1	0.985099	1.78e-23	3.88e-22
CYB5R2	-1.0954	1.54e-23	3.37e-22
CERS3	-2.08713	1.81e-23	3.94e-22
AC011472.1	-1.09809	1.84e-23	3.99e-22
FBLIM1	-0.888113	1.47e-23	3.23e-22
RCC1	0.946253	1.6e-23	3.5e-22
OR7E14P	1.16363	2.03e-23	4.4e-22
ELF3-AS1	1.35295	2.04e-23	4.41e-22
AC099676.1	1.16054	2.13e-23	4.58e-22
HMGN4	-0.654388	1.77e-23	3.86e-22
PLSCR4	-1.20451	2.04e-23	4.4e-22
VPS9D1-AS1	1.9327	2.5e-23	5.34e-22
MXRA7	-1.46436	2.08e-23	4.49e-22
MAP3K20	-1.38349	2.13e-23	4.58e-22
RNF175	-1.63277	2.85e-23	6.08e-22
GJA1	-1.60639	2.23e-23	4.78e-22
MOB3B	-1.05217	2.7e-23	5.78e-22
	-1.16986	3.04e-23	6.46e-22
ZSCAN2	0.74615	2.86e-23	6.1e-22
STEAP1	1.43457	2.3e-23	4.92e-22
TESMIN	0.982899	3.55e-23	7.48e-22
SMARCA4	0.543889	2.92e-23	6.22e-22
SNHG20	0.973457	3.88e-23	8.15e-22
S100A16	-1.41274	3.07e-23	6.5e-22
RHOQ	-0.649223	3.01e-23	6.4e-22
SAPCD2	1.45772	3.54e-23	7.47e-22
PARM1	-1.4813	3.27e-23	6.92e-22
U73166.1	1.90939	4.23e-23	8.84e-22
AC011523.1	2.95478	3.47e-23	7.33e-22
NPTN	-0.738209	3.45e-23	7.3e-22
AL031587.6	-0.811088	4.35e-23	9.06e-22
RP9P	-1.33049	4.9e-23	1.02e-21
MAMSTR	-1.07525	5.01e-23	1.04e-21
LMO4	-0.933005	3.73e-23	7.85e-22
RHPN1	1.75912	4.48e-23	9.32e-22
SGCE	-1.19914	4.24e-23	8.85e-22
WISP2	-2.39182	5e-23	1.04e-21
APBB1	-0.949851	4.02e-23	8.44e-22
C1QTNF1	-1.51703	4.07e-23	8.52e-22
PLP1	-2.39837	5.6e-23	1.16e-21
GNL2	0.565605	4.56e-23	9.49e-22
SNHG25	2.41116	5.79e-23	1.19e-21
PNCK	-1.54956	5.43e-23	1.12e-21
WFIKKN2	-1.66703	6.42e-23	1.31e-21
ARHGEF28	-1.30822	5.47e-23	1.13e-21
NACAD	-1.34925	6.24e-23	1.28e-21
NMUR1	-1.63046	6.81e-23	1.38e-21
DENND2C	-0.930196	6.67e-23	1.36e-21
SYNM	-2.26365	5.89e-23	1.21e-21
FBXL22	-1.0975	6.79e-23	1.38e-21
CREB3L4	1.05449	5.86e-23	1.21e-21
PALLD	-1.58559	6.53e-23	1.33e-21
ZNF74	0.628643	7.31e-23	1.48e-21
EFEMP1	-1.59398	6.5e-23	1.33e-21
YAP1	-0.981581	6.63e-23	1.35e-21
PTCHD1	-1.91429	9.59e-23	1.93e-21
DBNDD1	1.46512	8.8e-23	1.77e-21
MPZL2	-1.13698	8.69e-23	1.75e-21
ADAD2	-1.76781	1.17e-22	2.33e-21
RAB11FIP3	0.55873	8.78e-23	1.77e-21
WWC2-AS2	-1.41306	1.25e-22	2.48e-21
CRTAP	-0.610614	9.99e-23	2e-21
VPS37C	0.642652	9.66e-23	1.94e-21
SPAG5	1.38479	1.38e-22	2.72e-21
RPL13P5	-0.896799	1.42e-22	2.8e-21
RAVER2	-0.625743	1.07e-22	2.14e-21
AL353622.1	2.10857	1.5e-22	2.93e-21
P2RX1	-1.88087	1.37e-22	2.7e-21
HIST3H2A	1.93395	1.36e-22	2.69e-21
RBPMS2	-1.2622	1.24e-22	2.46e-21
AC105219.4	1.66023	1.54e-22	3.02e-21
FAAP100	0.706229	1.28e-22	2.54e-21
TACR2	-1.57326	1.73e-22	3.36e-21
ARL10	-0.985402	1.62e-22	3.17e-21
NFE2L2	-0.745361	1.34e-22	2.64e-21
RUVBL1	0.759055	1.44e-22	2.83e-21
DMKN	-1.74273	1.58e-22	3.08e-21
DAB2IP	-0.882892	1.46e-22	2.87e-21
LMX1B	3.01865	1.98e-22	3.84e-21
ARVCF	0.860656	1.68e-22	3.27e-21
RAP2C-AS1	-0.975284	2.2e-22	4.25e-21
KLHL42	-0.651264	1.63e-22	3.18e-21
AC110285.7	2.74514	1.87e-22	3.63e-21
PRR7	1.81316	2.5e-22	4.82e-21
LRTOMT	0.65591	2.03e-22	3.94e-21
HOXA7	-1.52715	2.72e-22	5.21e-21
AC080013.1	-1.18008	2.71e-22	5.2e-21
SCUBE3	-1.39434	2.64e-22	5.06e-21
GCOM1	-1.52058	2.89e-22	5.52e-21
AIFM2	-0.826645	2.53e-22	4.87e-21
UCN	1.99551	3.08e-22	5.85e-21
SLC16A2	-1.07341	2.53e-22	4.86e-21
CARMN	-1.67082	2.91e-22	5.54e-21
STX7	-0.481671	2.38e-22	4.6e-21
TMX4	-0.671712	2.52e-22	4.84e-21
RNF112	-1.78506	3.37e-22	6.36e-21
CCNA2	1.56122	3.5e-22	6.59e-21
CALD1	-1.3758	2.88e-22	5.49e-21
SMYD4	-0.495869	2.83e-22	5.41e-21
TMEM43	-0.534	2.73e-22	5.22e-21
C1orf186	-1.82691	3.76e-22	7.05e-21
TUBA4A	-1.33303	2.82e-22	5.4e-21
OSBPL11	-0.59284	3.17e-22	6e-21
PLIN4	-1.55383	3.01e-22	5.72e-21
CPA6	-2.52062	3.87e-22	7.24e-21
AC026356.2	2.05283	3.95e-22	7.39e-21
GNG12	-0.766812	3.13e-22	5.93e-21
AC093908.1	-1.41313	4.33e-22	8.08e-21
PDE4D	-1.03484	3.16e-22	5.98e-21
KANK2	-1.30459	3.48e-22	6.56e-21
NPPC	-2.92567	4.83e-22	8.93e-21
PPP2R2B	-1.46814	4.81e-22	8.91e-21
ARHGEF4	-0.966356	3.87e-22	7.25e-21
CORO1C	-0.938796	3.54e-22	6.65e-21
TRIM27	0.53211	3.58e-22	6.72e-21
CENPM	1.88353	5.06e-22	9.34e-21
MICU3	-1.26567	4.83e-22	8.93e-21
TEPP	-2.10765	5.3e-22	9.77e-21
HS3ST3A1	-1.6598	5.32e-22	9.78e-21
ITGB6	-1.89499	4.36e-22	8.11e-21
RPL7P16	3.30484	5.32e-22	9.78e-21
SPTY2D1-AS1	1.00975	5.77e-22	1.06e-20
AP000911.1	-1.30289	5.86e-22	1.07e-20
ARHGEF25	-1.26781	4.37e-22	8.13e-21
LRFN5	-1.66187	5.94e-22	1.08e-20
MEIS3P1	-1.58462	5.94e-22	1.08e-20
	1.12778	6.36e-22	1.15e-20
CACFD1	0.896645	4.64e-22	8.62e-21
LINC00092	-1.49253	6.37e-22	1.15e-20
PLCD3	-1.03243	4.95e-22	9.16e-21
AC009299.2	-1.46902	6.88e-22	1.24e-20
DLK2	-1.698	5.91e-22	1.08e-20
GPSM2	-0.732242	6.06e-22	1.1e-20
BAIAP2L1	0.869281	5.39e-22	9.9e-21
ZMYND19	0.832874	6.09e-22	1.11e-20
RASD2	-1.14043	5.72e-22	1.05e-20
SFPQ	0.454339	5.78e-22	1.06e-20
PABPC4L	-1.27596	7.29e-22	1.31e-20
GGT6	-2.07618	6.67e-22	1.2e-20
BOP1	1.15748	5.96e-22	1.09e-20
BIK	1.3166	6.82e-22	1.23e-20
PLS3	-1.14175	6.26e-22	1.14e-20
FBXL7	-0.844193	6.48e-22	1.17e-20
MNX1-AS2	3.59865	7.45e-22	1.33e-20
HEPH	-1.39364	6.76e-22	1.22e-20
CAMK1G	-1.53398	9.03e-22	1.6e-20
ADGRF3	-0.840798	9.32e-22	1.65e-20
VARS	0.66095	6.72e-22	1.21e-20
CIDEB	-1.04099	9.34e-22	1.65e-20
NNT-AS1	-0.792219	7.9e-22	1.41e-20
RAPGEFL1	-1.12937	7.95e-22	1.42e-20
LINC00672	-1.52501	9.92e-22	1.75e-20
MAP1LC3B	-0.629328	7.27e-22	1.3e-20
AC106881.1	-1.54165	1.02e-21	1.79e-20
ZSCAN26	-0.416271	8.44e-22	1.5e-20
SHMT2	0.834567	7.75e-22	1.38e-20
GGA2	-0.486929	7.79e-22	1.39e-20
B4GALT3	0.586911	7.82e-22	1.4e-20
PKMYT1	1.6984	1.09e-21	1.9e-20
CCDC88A	-1.02919	8.8e-22	1.56e-20
AL359915.2	0.762277	1.06e-21	1.86e-20
SPC24	1.73333	1.15e-21	1.99e-20
DAZAP1	0.540395	8.19e-22	1.46e-20
C3orf18	-0.858284	9.77e-22	1.72e-20
CAP2	-1.27799	8.79e-22	1.56e-20
C1QL1	-2.14185	1.18e-21	2.04e-20
C10orf95	1.35963	1.19e-21	2.07e-20
NACC2	-0.86615	8.77e-22	1.55e-20
GTPBP3	0.612503	1.03e-21	1.8e-20
EFHC2	-1.30677	1.23e-21	2.12e-20
HMMR	1.97495	1.31e-21	2.27e-20
APOBEC3F	-1.3172	1.16e-21	2.01e-20
FAM229B	-0.81584	1.13e-21	1.97e-20
CASQ1	-2.20957	1.36e-21	2.35e-20
SYNPO2	-2.26789	1.12e-21	1.95e-20
NR3C1	-1.07846	1.01e-21	1.79e-20
CFAP65	1.97571	1.47e-21	2.51e-20
ZNF853	-0.998808	1.16e-21	2.02e-20
AP002800.1	-2.04575	1.43e-21	2.46e-20
SEMA5A	-1.41334	1.16e-21	2.02e-20
SYNGR2	0.840399	1.14e-21	1.98e-20
INMT	-1.47426	1.12e-21	1.95e-20
RASSF5	-1.14317	1.17e-21	2.03e-20
HR	-1.3859	1.3e-21	2.24e-20
GPX3	-1.73214	1.13e-21	1.97e-20
ITGB1BP2	-1.42355	1.58e-21	2.69e-20
CAPG	-1.42797	1.2e-21	2.08e-20
TRHDE-AS1	-1.76777	1.7e-21	2.9e-20
SOWAHC	-0.674818	1.37e-21	2.36e-20
ARHGAP10	-1.00403	1.39e-21	2.38e-20
EFCAB1	-1.81302	1.83e-21	3.1e-20
CCND2	-1.491	1.37e-21	2.36e-20
HNRNPA2B1	0.437382	1.54e-21	2.63e-20
LINC01977	2.13152	1.91e-21	3.23e-20
PROK1	-2.40393	1.96e-21	3.31e-20
TRMT1L	-0.507317	1.58e-21	2.7e-20
WDFY2	-0.656143	1.7e-21	2.9e-20
AC139783.1	3.97224	1.91e-21	3.22e-20
PLAC9	-1.71134	2.13e-21	3.58e-20
AC009812.4	1.30604	2.26e-21	3.79e-20
DUX4L50	-1.51822	2.36e-21	3.95e-20
FZD1	-0.861756	1.69e-21	2.88e-20
NEXN	-1.64803	1.72e-21	2.92e-20
SGCG	-2.14974	2.43e-21	4.07e-20
SDHD	-0.56176	1.72e-21	2.93e-20
AP000892.3	-1.63488	1.87e-21	3.16e-20
SLC25A33	0.947435	2.11e-21	3.56e-20
NCAPG	1.8761	2.59e-21	4.32e-20
TPD52	0.98603	2.08e-21	3.5e-20
TPRG1	-1.2307	2.9e-21	4.82e-20
GJC1	-1.2435	2.38e-21	3.99e-20
TTC6	1.59869	2.65e-21	4.41e-20
TMEM158	-1.43836	2.48e-21	4.14e-20
KCNMA1	-1.5981	2.3e-21	3.86e-20
HIST1H2BN	1.20987	3.34e-21	5.55e-20
ATCAY	-1.89522	3.21e-21	5.33e-20
NOC2L	0.540532	2.54e-21	4.24e-20
CIRBP-AS1	1.21807	3.63e-21	6e-20
PPP1R12B	-1.52114	2.81e-21	4.68e-20
TLCD1	1.40404	3.37e-21	5.59e-20
ATP6V0D2	-2.18167	3.8e-21	6.25e-20
ONECUT2	3.40696	3.8e-21	6.25e-20
AC061975.7	-1.38533	3.61e-21	5.96e-20
AC104170.1	1.68767	3.79e-21	6.25e-20
ARHGAP24	-1.01924	3.67e-21	6.06e-20
ARHGEF38-IT1	2.33135	3.81e-21	6.26e-20
DPYSL3	-1.32797	3.4e-21	5.63e-20
C7orf31	-1.09536	4.34e-21	7.11e-20
DNAJC27	-0.514879	4.02e-21	6.6e-20
RGL2	0.80531	3.24e-21	5.38e-20
HOXD11	-1.97046	5.07e-21	8.25e-20
NEK2	2.15219	5.24e-21	8.53e-20
HGNC:18790	-1.858	4.39e-21	7.19e-20
FAM212A	-1.48499	5.33e-21	8.65e-20
TMEM106A	-1.08839	5.32e-21	8.64e-20
AURKB	1.8314	5.69e-21	9.2e-20
FUT3	-2.26056	5.86e-21	9.46e-20
SKA1	1.66891	5.8e-21	9.37e-20
DNASE1	0.920725	4.63e-21	7.57e-20
ANO7L1	-1.08608	6.04e-21	9.73e-20
PPP1R26-AS1	0.909829	5.79e-21	9.35e-20
TPRN	1.16024	4.74e-21	7.74e-20
GRIA3	-2.06226	6.33e-21	1.02e-19
CDCA3	1.38113	6.38e-21	1.02e-19
SERPINB1	-1.29243	4.75e-21	7.76e-20
FAM19A1	-1.81952	6.62e-21	1.06e-19
REEP1	-1.28742	5.45e-21	8.84e-20
FCRLB	-1.28453	6.8e-21	1.08e-19
TAF1D	0.817586	5e-21	8.16e-20
FBXO32	-1.10683	5.05e-21	8.23e-20
CDKN3	1.63676	7.1e-21	1.13e-19
LINC01503	-1.40942	6.71e-21	1.07e-19
AC138904.1	1.97481	6.66e-21	1.07e-19
SNHG4	2.05683	7.59e-21	1.2e-19
TMOD1	-1.16638	6.42e-21	1.03e-19
ANKRD35	-1.3991	6.75e-21	1.08e-19
FNDC10	2.07015	7.67e-21	1.21e-19
CCDC158	-1.25882	7.84e-21	1.24e-19
RERG	-1.08805	6.52e-21	1.05e-19
INPPL1	0.425377	5.98e-21	9.64e-20
PEX14	-0.558987	6.12e-21	9.85e-20
VAMP4	-0.434525	6.68e-21	1.07e-19
POLD2	0.771775	6.35e-21	1.02e-19
ARMCX4	-1.17962	7.28e-21	1.15e-19
MTMR10	-0.482554	6.86e-21	1.09e-19
GPRIN1	1.35938	9.69e-21	1.51e-19
AL031123.3	1.93583	8.99e-21	1.41e-19
CA11	-1.14665	8.24e-21	1.3e-19
HSPB6	-1.98808	7.3e-21	1.16e-19
PIAS1	-0.718082	7.2e-21	1.14e-19
MTFR1L	-0.446832	7.21e-21	1.14e-19
TIMP3	-1.65496	8.9e-21	1.39e-19
RCAN2	-1.27573	7.85e-21	1.24e-19
CCK	-3.18776	1.04e-20	1.62e-19
P2RY12	-1.57608	1.15e-20	1.78e-19
EFEMP2	-1.29698	8.26e-21	1.3e-19
PPTC7	-0.543504	8.47e-21	1.33e-19
SCRIB	0.798619	8.32e-21	1.31e-19
CDS2	-0.498395	8.68e-21	1.36e-19
ZNF121	0.710145	9.39e-21	1.47e-19
HRH2	-1.74315	1.37e-20	2.11e-19
SBDS	-0.486979	9.82e-21	1.53e-19
RRAS	-1.15457	1.03e-20	1.61e-19
WDR55	0.444185	1.12e-20	1.74e-19
GLT1D1	-1.89976	1.55e-20	2.38e-19
B3GALT6	0.945368	1.2e-20	1.87e-19
GGCT	1.08184	1.24e-20	1.92e-19
ZNF316	0.605032	1.28e-20	1.98e-19
ANKRD53	-1.21741	1.79e-20	2.73e-19
SYNC	-1.44284	1.68e-20	2.57e-19
PLPPR2	0.742415	1.27e-20	1.96e-19
AC012073.1	0.955139	1.83e-20	2.78e-19
AC015922.4	-1.09643	1.76e-20	2.69e-19
ZSCAN16	0.747241	1.84e-20	2.8e-19
LAYN	-1.09512	1.62e-20	2.48e-19
BBX	-0.891434	1.44e-20	2.22e-19
IL33	-1.2965	1.5e-20	2.31e-19
EDNRB	-1.59435	1.57e-20	2.41e-19
ASPH	-1.1199	1.5e-20	2.3e-19
LMOD1	-1.99249	1.59e-20	2.44e-19
NOX4	2.29997	2.18e-20	3.29e-19
PRODH	-1.67622	2.46e-20	3.71e-19
CHST11	-1.08046	2.07e-20	3.13e-19
AC008764.8	1.25321	2.74e-20	4.11e-19
RBBP7	-0.552139	1.97e-20	2.98e-19
CFAP221	-1.70367	2.82e-20	4.23e-19
CENPF	1.93124	2.74e-20	4.11e-19
TWIST2	-1.46978	2.57e-20	3.88e-19
IL11	1.73562	3.16e-20	4.71e-19
CCNB2	1.45075	3.24e-20	4.82e-19
EFHD1	-1.22473	2.67e-20	4.02e-19
UNQ6494	1.99549	3.33e-20	4.95e-19
CTBP1-AS	2.37228	3.49e-20	5.16e-19
FAM136A	0.564401	2.54e-20	3.83e-19
CHST6	-1.49336	3.89e-20	5.74e-19
MYH11	-2.30804	3.43e-20	5.07e-19
SP6	-1.20241	3.54e-20	5.23e-19
EIF3B	0.659787	2.84e-20	4.25e-19
CHST15	-1.17473	2.98e-20	4.45e-19
SPC25	1.71508	4.05e-20	5.93e-19
RBMS1	-0.943526	2.87e-20	4.29e-19
ATP6V1G1	0.722778	3e-20	4.48e-19
KLHL17	1.13694	3.98e-20	5.84e-19
EHMT2-AS1	1.80198	3.89e-20	5.73e-19
TMEM51-AS1	-1.19722	4.22e-20	6.18e-19
INPP1	-1.05248	3.41e-20	5.05e-19
SCRG1	-1.46689	3.93e-20	5.78e-19
ENTPD6	0.71041	3.1e-20	4.62e-19
PPM1L	-0.958279	3.37e-20	5e-19
GPX8	-1.13449	4.03e-20	5.91e-19
SSTR2	-1.36199	5.11e-20	7.44e-19
CHMP1B	-0.550264	3.99e-20	5.86e-19
TGM1	-1.5068	5.8e-20	8.4e-19
VEPH1	-1.73671	6.19e-20	8.94e-19
SHCBP1	1.63667	6.26e-20	9.03e-19
SLC25A45	1.10267	5.58e-20	8.09e-19
CBX4	0.845014	4.84e-20	7.06e-19
ZIC2	5.28148	6.11e-20	8.83e-19
SYNE4	1.01811	5.21e-20	7.57e-19
DDR2	-1.35789	4.87e-20	7.11e-19
NCAPH	1.685	7.14e-20	1.03e-18
CLDN3	1.38236	5.12e-20	7.45e-19
UBE2QL1	-1.26343	6.4e-20	9.24e-19
ERC1	-0.747768	5.26e-20	7.65e-19
MOGS	0.583277	5.42e-20	7.87e-19
RASGRF1	-1.59785	7.93e-20	1.13e-18
AC007541.1	-0.877913	7.89e-20	1.13e-18
C2CD4C	2.25652	8.15e-20	1.16e-18
DEPDC1B	1.91283	8.41e-20	1.2e-18
PDCD2L	0.772992	7.89e-20	1.13e-18
BDH2	-1.09047	6.7e-20	9.64e-19
PRC1	1.14588	8.18e-20	1.17e-18
FERMT1	-1.55255	7.01e-20	1.01e-18
EHD2	-1.32753	6.65e-20	9.59e-19
MNX1	3.88707	9.17e-20	1.3e-18
MROH8	-0.682331	9.37e-20	1.33e-18
RGS9	-1.55503	9.12e-20	1.3e-18
MPZ	-1.97301	9.44e-20	1.34e-18
TRIP6	-1.12	7.04e-20	1.01e-18
RARG	-1.02522	7.71e-20	1.11e-18
CEP83	0.716768	9.49e-20	1.34e-18
CLIC4	-1.08792	7.98e-20	1.14e-18
CTU1	1.12489	1.17e-19	1.64e-18
IL1R2	-1.30119	1.2e-19	1.69e-18
CDKN1C	-0.990441	9.24e-20	1.31e-18
AC115284.2	-1.55056	1.33e-19	1.86e-18
SOWAHA	-1.44745	1.25e-19	1.75e-18
CAMK1D	-1.16921	1.07e-19	1.51e-18
FRMD3	-1.13411	1.35e-19	1.89e-18
SPTLC3	-1.17392	1.23e-19	1.73e-18
PLN	-1.51324	1.15e-19	1.62e-18
MTM1	-0.711272	1.22e-19	1.71e-18
CHST9	-2.11686	1.35e-19	1.88e-18
LINC00654	-1.44943	1.56e-19	2.17e-18
PTGIS	-1.59749	1.14e-19	1.6e-18
HNRNPAB	0.548756	1.13e-19	1.59e-18
AC092111.1	-1.21865	1.71e-19	2.36e-18
METTL3	0.552863	1.21e-19	1.7e-18
FKBP7	-0.629036	1.43e-19	1.99e-18
PHF19	-0.658038	1.27e-19	1.77e-18
TSACC	1.3876	1.7e-19	2.35e-18
AC026356.1	1.92809	1.76e-19	2.43e-18
LINC00844	-2.20431	1.61e-19	2.23e-18
CREBRF	-0.686859	1.28e-19	1.79e-18
DNAH14	0.859024	1.78e-19	2.46e-18
GPR135	-0.762139	1.76e-19	2.43e-18
C11orf80	0.80106	1.43e-19	1.99e-18
RGS13	-1.62911	1.97e-19	2.69e-18
TMEM139	-1.40505	1.98e-19	2.7e-18
OLFML2A	-1.18723	1.46e-19	2.03e-18
Z83851.1	0.935687	2.1e-19	2.86e-18
BCL2	-1.21229	1.46e-19	2.03e-18
NAALADL1	-1.1572	1.91e-19	2.61e-18
ANKRD66	2.65426	1.89e-19	2.59e-18
GAB1	-0.760794	1.57e-19	2.17e-18
STARD4	-1.2316	1.7e-19	2.34e-18
EPS8	-0.894113	1.61e-19	2.23e-18
ETV5	-1.28095	1.89e-19	2.59e-18
MTSS1L	-0.687579	1.8e-19	2.47e-18
SNAPC4	0.712528	1.93e-19	2.64e-18
CCDC78	2.54069	2.58e-19	3.47e-18
FKBP9P1	-1.12862	2.6e-19	3.49e-18
NDUFB2-AS1	0.703276	2.68e-19	3.59e-18
AC010326.4	0.87127	2.67e-19	3.58e-18
SLC38A5	-1.27882	2.59e-19	3.48e-18
DRAIC	2.40683	2.58e-19	3.47e-18
SNX8	0.626984	2.12e-19	2.89e-18
PTBP2	-0.564208	2.09e-19	2.86e-18
CEP126	-1.09568	2.53e-19	3.41e-18
FAM92A	-0.627988	2.34e-19	3.17e-18
PMEPA1	1.04255	2.16e-19	2.93e-18
EDA2R	-1.3406	2.71e-19	3.62e-18
FAM167A	-1.74413	2.77e-19	3.69e-18
DTNA	-1.37887	2.18e-19	2.96e-18
SLC4A11	-1.20973	2.7e-19	3.6e-18
C19orf47	-0.440866	2.32e-19	3.14e-18
TSPAN13	0.993718	2.11e-19	2.88e-18
ATP13A1	0.557515	2.14e-19	2.91e-18
STAC2	-2.3114	2.83e-19	3.77e-18
NUDT17	-0.715959	3.11e-19	4.12e-18
LINC00886	-1.22204	3.08e-19	4.09e-18
KCTD17	-1.02255	2.67e-19	3.58e-18
NUPL2	0.455301	2.4e-19	3.25e-18
SOX4	0.954314	2.24e-19	3.04e-18
CD59	-0.696047	2.43e-19	3.29e-18
EDAR	-2.04696	3.39e-19	4.49e-18
CAMSAP3	0.792209	2.4e-19	3.25e-18
PTGER3	-1.42875	3.19e-19	4.23e-18
VPS37A	-0.605581	2.52e-19	3.4e-18
TMEM154	-1.25757	3.29e-19	4.35e-18
KANSL3	-0.347315	2.51e-19	3.38e-18
DCAF13	0.655001	2.72e-19	3.63e-18
BDH1	0.860287	2.68e-19	3.59e-18
IRAK1BP1	-0.802848	3.33e-19	4.41e-18
CYTH2	0.554999	2.66e-19	3.56e-18
PANO1	1.10938	3.98e-19	5.22e-18
MRRF	0.60569	2.98e-19	3.97e-18
PLPP7	-1.35783	3.92e-19	5.15e-18
RRP12	0.718128	3.01e-19	4e-18
OAT	-1.21087	2.94e-19	3.91e-18
KIF9	0.843227	3.88e-19	5.1e-18
SLC26A1	1.11195	4.23e-19	5.52e-18
ANKDD1A	-0.766793	3.82e-19	5.03e-18
LINC01509	2.2034	4.19e-19	5.47e-18
ZBTB38	-0.890164	3.05e-19	4.05e-18
GJB3	-1.98548	4.23e-19	5.52e-18
DNAJC15	-1.43083	3.5e-19	4.62e-18
TP53AIP1	-1.53246	4.75e-19	6.16e-18
STIL	1.1616	4.5e-19	5.87e-18
C14orf132	-1.19931	3.46e-19	4.58e-18
ANKZF1	0.784888	3.41e-19	4.51e-18
BEX1	-2.11712	4.73e-19	6.15e-18
LINC02492	3.16203	4.46e-19	5.82e-18
RAB12	-0.618387	3.6e-19	4.74e-18
EIF3EP1	-0.768051	5.09e-19	6.59e-18
IPO4	0.870357	4.85e-19	6.29e-18
MBNL1	-0.665177	3.66e-19	4.82e-18
ITM2B	-0.702566	4.06e-19	5.32e-18
PCED1A	0.838986	4.06e-19	5.31e-18
AC053503.6	-1.97568	5.71e-19	7.33e-18
HAPLN2	-1.59388	5.64e-19	7.26e-18
TIMM10B	-0.445359	3.99e-19	5.23e-18
RBPMS	-1.32705	4.05e-19	5.31e-18
LINC00641	-0.797641	4.96e-19	6.43e-18
AC009119.1	2.91011	6.09e-19	7.77e-18
SCGB1A1	-3.19604	5.14e-19	6.64e-18
TMEM241	0.953178	5.67e-19	7.29e-18
LZTFL1	-0.633665	4.66e-19	6.05e-18
MEF2C-AS1	-1.33732	6.53e-19	8.31e-18
CENPO	0.722147	5.98e-19	7.65e-18
RTN4RL2	1.38103	6.51e-19	8.29e-18
RBM45	0.400138	5.74e-19	7.35e-18
NKIRAS1	-0.483956	5.46e-19	7.05e-18
PAICS	0.702452	4.63e-19	6.02e-18
MXD3	1.54268	6.72e-19	8.53e-18
COL10A1	3.88504	6.91e-19	8.76e-18
SHF	-0.78346	5.91e-19	7.56e-18
LEMD2	0.455368	4.74e-19	6.15e-18
GNG11	-1.02608	5.09e-19	6.59e-18
TMEM185A	-0.492263	5.72e-19	7.34e-18
NETO2	1.98038	7.26e-19	9.2e-18
SREK1IP1	-0.587512	5.33e-19	6.89e-18
PKMP3	-0.874553	7.93e-19	9.99e-18
BTN2A1	-0.492758	5.77e-19	7.38e-18
NOP56	0.513069	5.5e-19	7.09e-18
AC098614.1	-0.87365	8.19e-19	1.03e-17
PRKN	-0.865184	7.53e-19	9.52e-18
SLC25A37	0.762823	5.66e-19	7.28e-18
RHOB	-1.30245	6.31e-19	8.05e-18
DVL1	0.758808	5.73e-19	7.35e-18
AL135999.1	1.74197	8.73e-19	1.09e-17
CAPN10-AS1	1.32117	9.21e-19	1.15e-17
SECISBP2	0.456409	6.24e-19	7.96e-18
FBXO46	0.594641	6.84e-19	8.68e-18
ZNF655	-1.49698	6.54e-19	8.32e-18
AC096540.1	1.1911	9.54e-19	1.19e-17
CNRIP1	-1.0615	7.78e-19	9.81e-18
CHIC1	-0.505408	7.37e-19	9.32e-18
C9orf3	-0.89465	6.71e-19	8.53e-18
PDE2A	-1.10135	7.78e-19	9.81e-18
AMACR	2.93165	8.08e-19	1.02e-17
TMEM40	-2.29325	1.03e-18	1.27e-17
DGKH	-1.00084	8.79e-19	1.1e-17
LPCAT1	0.727534	7.53e-19	9.52e-18
FAM110C	-1.70339	9.01e-19	1.12e-17
AC145207.9	1.69318	1.07e-18	1.32e-17
SCRN1	-1.15187	7.7e-19	9.72e-18
RCC2	0.62813	7.94e-19	9.99e-18
FCHSD2	-0.751465	8.55e-19	1.07e-17
DKK3	-1.39553	8.68e-19	1.09e-17
LINC00900	-1.14913	1.27e-18	1.55e-17
FLRT2	-1.40377	1.01e-18	1.25e-17
SRM	0.907989	8.94e-19	1.12e-17
TNFRSF10D	-1.23428	1.2e-18	1.47e-17
HSPD1	0.710608	9.43e-19	1.17e-17
FABP3	-1.37711	1.02e-18	1.26e-17
RSU1	-0.639431	9.33e-19	1.16e-17
APOE	1.83417	9.94e-19	1.23e-17
ZNF711	-1.39589	1.3e-18	1.6e-17
PDCD6	0.487986	9.81e-19	1.22e-17
FAM178B	-1.43617	1.5e-18	1.82e-17
VSTM4	-1.24054	1.04e-18	1.28e-17
STEAP2-AS1	1.71004	1.48e-18	1.8e-17
LINC00115	1.28341	1.55e-18	1.88e-17
SLC37A1	0.93667	1.06e-18	1.31e-17
RAB3D	0.773841	1.07e-18	1.32e-17
ZNF3	0.506045	1.11e-18	1.37e-17
DKC1	0.472354	1.1e-18	1.35e-17
WNT16	-1.69608	1.66e-18	2e-17
DNM3	-0.815572	1.55e-18	1.88e-17
RPRM	-1.56526	1.53e-18	1.86e-17
AC098934.1	1.22827	1.66e-18	2e-17
HVCN1	-0.898093	1.54e-18	1.87e-17
SESTD1	-0.633288	1.21e-18	1.48e-17
SRF	-0.669366	1.18e-18	1.46e-17
IER3	-1.6223	1.24e-18	1.52e-17
PPP1R14A	-1.43589	1.3e-18	1.59e-17
PLEKHN1	1.1769	1.77e-18	2.12e-17
C12orf73	0.731963	1.63e-18	1.97e-17
TOR2A	0.717984	1.5e-18	1.82e-17
CAVIN1	-1.31231	1.41e-18	1.72e-17
RBM15B	0.430258	1.31e-18	1.61e-17
TRIB1	1.48067	1.35e-18	1.65e-17
SFXN3	-0.889723	1.47e-18	1.78e-17
AC097468.1	1.52354	2.17e-18	2.59e-17
ANKRD33B	-1.38396	1.96e-18	2.35e-17
FOXJ2	-0.487172	1.5e-18	1.83e-17
AC239868.2	1.48564	1.93e-18	2.31e-17
PCLAF	1.38694	2.2e-18	2.62e-17
RAB3B	1.47191	1.53e-18	1.85e-17
TRUB2	0.555636	1.58e-18	1.91e-17
CLCA4	-2.97632	2.36e-18	2.8e-17
TMEM47	-1.13399	1.62e-18	1.96e-17
TONSL	0.895621	2.17e-18	2.59e-17
WDR5	0.450541	1.74e-18	2.09e-17
AF001548.1	-1.75448	2.62e-18	3.09e-17
DLEU1	-0.802642	2.35e-18	2.79e-17
SH3BGR	-1.03824	2.06e-18	2.46e-17
SGCA	-1.45569	2.03e-18	2.43e-17
GPR89A	0.703736	2.58e-18	3.05e-17
ITFG2	-0.507966	1.9e-18	2.29e-17
TWNK	0.783949	2.23e-18	2.66e-17
PLCD4	-0.757773	2.5e-18	2.97e-17
CLDN11	-1.22778	2.29e-18	2.72e-17
AP000808.1	-2.23099	2.71e-18	3.2e-17
LINC01134	1.21218	2.98e-18	3.48e-17
NPRL3	0.546539	2.13e-18	2.55e-17
PNMA1	-1.04163	2.2e-18	2.62e-17
AL391244.3	1.05684	3.31e-18	3.85e-17
PRRG1	-0.981396	2.78e-18	3.27e-17
TMEM100	-1.56891	3.01e-18	3.52e-17
AIFM1	0.541992	2.44e-18	2.9e-17
ZMAT3	-0.71759	2.54e-18	3.01e-17
ZNF25	-0.487687	2.78e-18	3.27e-17
GAL	2.69377	3.81e-18	4.42e-17
EMP3	-1.03895	2.91e-18	3.41e-17
PAPPA	-1.18663	3.78e-18	4.38e-17
SLC12A4	-0.892122	2.62e-18	3.1e-17
CAPNS2	-2.64131	4.01e-18	4.63e-17
TRERF1	-1.08346	2.94e-18	3.45e-17
HGH1	0.803692	2.84e-18	3.33e-17
GPD1L	-0.863181	2.75e-18	3.24e-17
ACAA2	-0.972803	2.81e-18	3.3e-17
TRIB3	1.0067	3e-18	3.5e-17
WWTR1	-0.854274	2.78e-18	3.27e-17
FHL1	-1.91143	2.95e-18	3.46e-17
CTSB	-0.915814	3.17e-18	3.69e-17
FAM21EP	1.17041	4.27e-18	4.92e-17
SSSCA1-AS1	0.759159	4.24e-18	4.89e-17
JDP2	-0.86202	3.17e-18	3.69e-17
C21orf58	0.882992	4.13e-18	4.76e-17
MSLN	-2.27808	4.08e-18	4.71e-17
AC007342.7	-0.762045	4.35e-18	5e-17
HIST3H2BB	1.94538	4.49e-18	5.15e-17
NUDT7	-0.799485	4.28e-18	4.92e-17
AC074117.1	0.795164	4.55e-18	5.22e-17
AL513497.1	1.21056	4.8e-18	5.48e-17
HPX	1.50928	4.86e-18	5.54e-17
FAM109A	0.627634	3.89e-18	4.5e-17
NRSN2-AS1	-0.523991	5.05e-18	5.75e-17
HSD17B13	-2.4185	4.9e-18	5.59e-17
ZNF383	-0.349508	4.34e-18	5e-17
RUNDC3A-AS1	1.54375	5.56e-18	6.3e-17
RUSC2	-0.799388	3.74e-18	4.34e-17
ID3	-1.41139	3.71e-18	4.3e-17
EME1	1.12346	5.64e-18	6.38e-17
SMKR1	1.68286	5.65e-18	6.39e-17
AXIN1	0.498816	3.83e-18	4.43e-17
ACTN1	-0.971865	4.05e-18	4.68e-17
AC010326.3	0.671788	5.41e-18	6.13e-17
XKR4	-1.96137	5.79e-18	6.54e-17
PNMA8A	-1.4408	4.45e-18	5.11e-17
AL032819.2	1.93333	5.16e-18	5.87e-17
SMTNL2	-1.9213	5.79e-18	6.55e-17
AL158211.5	-1.38927	5.94e-18	6.71e-17
UST	-1.01996	4.7e-18	5.38e-17
AMDHD2	0.744037	5.12e-18	5.83e-17
ZNF219	-0.886575	4.43e-18	5.09e-17
ACTG2	-2.24506	5.17e-18	5.89e-17
SERP2	-1.33251	6.12e-18	6.9e-17
NUF2	1.45937	6.68e-18	7.5e-17
MEF2A	-0.786797	4.41e-18	5.07e-17
ENO2	-0.936387	4.72e-18	5.4e-17
ROR1	-1.10976	5.37e-18	6.08e-17
GDF15	1.8083	4.55e-18	5.22e-17
PAQR5	-1.06825	6.78e-18	7.61e-17
SRSF6	0.519279	4.75e-18	5.43e-17
WFDC1	-1.50769	4.7e-18	5.38e-17
HIST1H2AM	2.00461	6.97e-18	7.8e-17
F10	-1.21932	6.04e-18	6.81e-17
C3orf80	1.2818	7.83e-18	8.71e-17
MPP6	1.15683	6.49e-18	7.3e-17
MARVELD1	-1.08391	5.21e-18	5.93e-17
NDUFAF6	0.704063	6.51e-18	7.32e-17
AC010719.1	2.21775	8.91e-18	9.87e-17
NEGR1	-1.34537	7.07e-18	7.9e-17
PMP2	-2.1645	9.05e-18	1e-16
ST8SIA1	-1.253	7.38e-18	8.24e-17
NDNF	-1.66029	7.37e-18	8.23e-17
NECTIN2	0.68001	6.4e-18	7.21e-17
CD38	-2.78267	6.58e-18	7.4e-17
GRSF1	0.399371	6.42e-18	7.23e-17
NRXN1	-1.80507	9.36e-18	1.03e-16
AMPH	-1.1804	1.02e-17	1.12e-16
BMP7	-1.69795	7.81e-18	8.7e-17
B3GLCT	-0.535757	8.6e-18	9.55e-17
QSOX1	-1.11677	7.33e-18	8.19e-17
TK1	1.40428	9.73e-18	1.07e-16
ZNF350	0.894068	7.6e-18	8.47e-17
SNRNP70	0.88558	7.7e-18	8.58e-17
RSPO2	-1.92302	1.06e-17	1.16e-16
GRAMD1B	-1.13744	1.1e-17	1.21e-16
PCGF5	-0.615745	7.82e-18	8.71e-17
GALNT6	-1.10823	1.09e-17	1.2e-16
TMEM268	0.616674	8.17e-18	9.08e-17
C21orf91	-0.588833	9.36e-18	1.03e-16
SULT1C2P1	-2.17482	1.28e-17	1.4e-16
PLCL2	-1.02263	1.13e-17	1.23e-16
HDHD5	0.562347	8.67e-18	9.61e-17
ATG5	-0.534728	8.62e-18	9.57e-17
PRAC1	2.15814	9.39e-18	1.04e-16
LIMS2	-1.44594	8.64e-18	9.59e-17
Y_RNA	0.879025	1.35e-17	1.46e-16
AC023024.1	1.08676	1.33e-17	1.45e-16
PDLIM1	-1.14579	8.84e-18	9.8e-17
HAGHL	2.02053	1.33e-17	1.45e-16
MNX1-AS1	3.52413	1.32e-17	1.43e-16
KLF16	0.948632	1.11e-17	1.21e-16
AC010809.1	1.05184	1.4e-17	1.52e-16
SH3BGRL	-1.14535	9.5e-18	1.05e-16
ARHGDIG	3.0189	1.44e-17	1.55e-16
AC018629.1	-2.364	1.41e-17	1.53e-16
FAM222A-AS1	2.03847	1.46e-17	1.58e-16
AC007743.1	-1.34721	1.54e-17	1.66e-16
PRRG3	-1.78391	1.54e-17	1.66e-16
DARS-AS1	0.979995	1.54e-17	1.66e-16
PIGW	0.748279	1.41e-17	1.53e-16
PRICKLE1	-1.0153	1.42e-17	1.54e-16
ZFAND5	-0.668229	1.18e-17	1.29e-16
SSPO	1.8022	1.67e-17	1.8e-16
ROCK2	-0.685967	1.14e-17	1.25e-16
SNPH	-1.13336	1.3e-17	1.42e-16
MTURN	-0.89985	1.17e-17	1.28e-16
HLA-F-AS1	-1.03426	1.75e-17	1.87e-16
TRNP1	-0.936977	1.48e-17	1.6e-16
HLA-K	-1.32124	1.76e-17	1.88e-16
SLC25A53	-0.438566	1.74e-17	1.87e-16
MFSD12	0.801893	1.27e-17	1.39e-16
LGALS3	-1.39178	1.29e-17	1.41e-16
AC097634.1	1.59537	2e-17	2.13e-16
JAK2	-0.687	1.48e-17	1.6e-16
ERCC6L	1.23482	2.06e-17	2.19e-16
NEAT1	1.4942	1.42e-17	1.54e-16
TFE3	-0.415963	1.36e-17	1.47e-16
IMPDH2	0.857298	1.4e-17	1.52e-16
ZNF419	0.625093	1.77e-17	1.88e-16
SMTN	-1.37389	1.48e-17	1.6e-16
AL139260.1	0.823522	2.19e-17	2.32e-16
HMGB3	0.766388	1.55e-17	1.66e-16
VEZF1	-0.512805	1.45e-17	1.57e-16
MSL1	0.441651	1.46e-17	1.57e-16
MTMR11	-0.914837	1.89e-17	2.01e-16
ARSJ	-1.23267	1.8e-17	1.92e-16
SLC25A10	1.1568	1.71e-17	1.83e-16
FAM111A	0.853065	1.52e-17	1.64e-16
PTP4A3	1.50037	1.56e-17	1.68e-16
HSPB7	-1.49754	1.65e-17	1.77e-16
AC096992.2	0.724863	2.46e-17	2.61e-16
RNFT2	1.29127	2.56e-17	2.7e-16
TMEM210	1.40753	2.59e-17	2.73e-16
PBK	1.90839	2.64e-17	2.77e-16
SLC37A3	0.680775	1.76e-17	1.88e-16
DUSP15	-1.38768	2.52e-17	2.67e-16
PUM3	0.482611	1.93e-17	2.06e-16
NLGN4Y	-0.853974	2.02e-17	2.15e-16
POU2F3	-0.970682	2.62e-17	2.76e-16
CEP112	-0.634902	2.28e-17	2.42e-16
LHFPL2	-0.86499	2.04e-17	2.16e-16
P4HTM	0.602395	1.94e-17	2.07e-16
ARFGEF3	1.16965	1.98e-17	2.11e-16
NONO	0.392259	2.14e-17	2.26e-16
Z99129.4	-0.785369	2.55e-17	2.69e-16
MDM1	-0.465631	2.44e-17	2.58e-16
CERS1	2.257	3.18e-17	3.32e-16
LINC00342	1.31386	3.04e-17	3.18e-16
LINC01637	-1.3333	3.24e-17	3.36e-16
NDE1	-0.65879	2.23e-17	2.36e-16
CEP162	-0.636691	2.64e-17	2.77e-16
	1.078	2.73e-17	2.86e-16
AC016737.1	1.62569	3.25e-17	3.37e-16
CTHRC1	1.94731	3.32e-17	3.45e-16
C17orf51	-0.656392	2.89e-17	3.03e-16
RRS1	0.831628	2.63e-17	2.76e-16
HSPB2	-1.38899	3.63e-17	3.75e-16
HCG4	-1.65399	3.82e-17	3.93e-16
TXN	0.794518	2.47e-17	2.61e-16
SPRED1	-0.885999	2.59e-17	2.72e-16
AC008741.2	1.47269	3.91e-17	4.01e-16
AC060766.1	-1.28254	4.04e-17	4.13e-16
TIMP4	-1.77654	3.83e-17	3.93e-16
AL163051.1	1.20032	4.17e-17	4.25e-16
MLPH	0.902278	2.83e-17	2.96e-16
SYT9	-1.79887	3.98e-17	4.07e-16
AC105942.1	-1.17873	3.64e-17	3.76e-16
LINGO3	1.65395	4.31e-17	4.39e-16
HMG20A	-0.750751	3.19e-17	3.32e-16
AC013726.1	1.51995	4.47e-17	4.54e-16
SCHIP1	-1.38102	4.58e-17	4.65e-16
LDAH	-1.41102	3.59e-17	3.72e-16
TMEM106B	-0.74192	3.12e-17	3.26e-16
SEMG2	-4.12267	4.66e-17	4.72e-16
BICDL1	1.05511	4.02e-17	4.1e-16
SMPDL3B	1.55593	4.13e-17	4.21e-16
ACTA2	-1.68232	3.87e-17	3.97e-16
WIPF3	-1.06372	3.95e-17	4.05e-16
KLHL35	1.52967	5.1e-17	5.15e-16
RNF217	-0.598601	3.74e-17	3.85e-16
BTG3-AS1	-1.01646	5.19e-17	5.23e-16
ZNF696	0.665673	4.53e-17	4.6e-16
NSUN2	0.393511	3.46e-17	3.58e-16
ZCCHC24	-0.764098	3.49e-17	3.61e-16
CNN1	-1.98635	3.96e-17	4.06e-16
RABGAP1L	-0.554429	3.74e-17	3.85e-16
S100B	-1.74799	5.17e-17	5.22e-16
PTP4A2	-0.463234	3.74e-17	3.85e-16
VTCN1	-2.18693	5.05e-17	5.11e-16
NRP2	-1.20489	3.84e-17	3.94e-16
GFRA1	-1.42267	4.55e-17	4.63e-16
AP000438.1	1.86203	6.01e-17	6.02e-16
PPP1R14BP3	1.30506	5.45e-17	5.47e-16
TUBB6	-1.03405	4.01e-17	4.1e-16
CDK5R1	1.10106	6.04e-17	6.05e-16
SERPINF2	-1.37397	4.35e-17	4.43e-16
MITF	-0.873079	4.59e-17	4.66e-16
POLR3E	0.439674	4.18e-17	4.26e-16
AC106028.3	1.1629	6.62e-17	6.59e-16
DDX19A	-0.419425	4.35e-17	4.43e-16
IQCK	-0.653889	5.4e-17	5.43e-16
BX324167.2	1.99883	6.43e-17	6.42e-16
MYOM1	-1.54538	5.4e-17	5.43e-16
FAM76A	-0.369732	4.98e-17	5.03e-16
RASL10B	-1.2552	6.25e-17	6.25e-16
ACP4	1.6829	6.83e-17	6.79e-16
LINC00593	2.44238	6.57e-17	6.54e-16
NHSL2	-1.55506	6.69e-17	6.65e-16
MSANTD4	-0.752175	5.22e-17	5.26e-16
AP001610.2	3.76435	6.94e-17	6.89e-16
AC004982.2	1.68996	7.05e-17	6.98e-16
C4orf19	-1.91167	6.95e-17	6.9e-16
EIF4E3	-0.656314	4.88e-17	4.94e-16
AC108860.2	1.09323	7.35e-17	7.27e-16
RNF219	-0.449108	6.4e-17	6.39e-16
GRK5	-0.800109	5.87e-17	5.88e-16
ZBTB47	-0.701071	5.33e-17	5.36e-16
BGN	1.2314	5.31e-17	5.34e-16
STARD5	-0.617637	7.55e-17	7.46e-16
ZNF442	-0.533072	7.78e-17	7.66e-16
KLF5	-1.21449	5.46e-17	5.48e-16
STEAP3	-0.946213	5.93e-17	5.94e-16
NIT2	0.524648	5.77e-17	5.79e-16
FKBP14	-0.475722	6.45e-17	6.43e-16
GNA14	-0.678751	7.16e-17	7.09e-16
AC011468.1	0.942533	9.08e-17	8.9e-16
ID2-AS1	-1.04515	9.52e-17	9.29e-16
AC024060.1	1.30298	9.33e-17	9.11e-16
ARHGEF17	-0.872521	6.15e-17	6.16e-16
PYCR3	0.951762	6.99e-17	6.93e-16
MPC2	0.939877	6.44e-17	6.42e-16
GAR1	0.510908	7.66e-17	7.55e-16
WNT10A	-1.43829	9.7e-17	9.46e-16
OGN	-1.6169	6.81e-17	6.77e-16
ZFP1	-0.522176	8.6e-17	8.45e-16
LINC01311	1.6128	1.07e-16	1.04e-15
MECP2	-0.41442	6.99e-17	6.93e-16
TMTC4	0.95904	7.32e-17	7.24e-16
AC018521.6	-0.941749	1.11e-16	1.07e-15
FAM169A	-1.26522	9.24e-17	9.03e-16
NOP16	0.851045	8.6e-17	8.45e-16
CD3EAP	0.628723	1.03e-16	1e-15
ATAT1	0.70784	8.52e-17	8.38e-16
AMT	-1.09702	7.86e-17	7.74e-16
AC002128.1	1.49045	1.15e-16	1.11e-15
CLMP	-1.10666	8.87e-17	8.71e-16
ADRB1	1.53568	9.11e-17	8.92e-16
MOV10	0.47513	7.42e-17	7.33e-16
SIK3	-0.526479	7.63e-17	7.53e-16
SLC12A9-AS1	1.21078	1.2e-16	1.16e-15
MYL9	-1.84715	9.04e-17	8.86e-16
CENPU	1.29845	1.13e-16	1.1e-15
MAZ	0.750861	7.74e-17	7.63e-16
AL669831.5	1.23883	1.24e-16	1.2e-15
PLXNA3	0.664979	7.9e-17	7.78e-16
RPS2	0.864968	9.19e-17	8.99e-16
	-1.2682	1.25e-16	1.21e-15
IGDCC4	-1.56895	1.33e-16	1.28e-15
CERNA1	-0.931306	1.36e-16	1.3e-15
AC004918.1	1.05506	1.39e-16	1.33e-15
AAAS	0.403702	9.04e-17	8.86e-16
LY6D	-2.76779	1.43e-16	1.37e-15
FNBP1	-0.653165	9.35e-17	9.12e-16
GDPD1	1.29941	1.29e-16	1.24e-15
CBX2	1.60355	1.42e-16	1.36e-15
FAM84B	0.770357	9.83e-17	9.58e-16
KIF2C	1.15345	1.48e-16	1.41e-15
CYTL1	-1.42114	1.5e-16	1.43e-15
PRSS16	-1.7392	1.24e-16	1.2e-15
MARF1	-0.451403	1.05e-16	1.02e-15
STOM	-1.09015	1.09e-16	1.06e-15
AL133355.1	-0.552189	1.53e-16	1.46e-15
PDIA5	0.814754	1.07e-16	1.04e-15
AC091544.5	1.91622	1.76e-16	1.67e-15
PLA2G4C-AS1	2.64889	1.71e-16	1.63e-15
SLC40A1	-1.06602	1.15e-16	1.11e-15
RNF152	-0.929764	1.28e-16	1.23e-15
DCUN1D5	0.571634	1.32e-16	1.27e-15
2018-09-05	0.925791	1.35e-16	1.29e-15
SRCIN1	1.26352	1.66e-16	1.58e-15
IRAK1	0.619882	1.22e-16	1.18e-15
AC010809.2	1.38781	1.94e-16	1.83e-15
ASF1B	1.37756	1.86e-16	1.76e-15
BMT2	-0.485238	1.41e-16	1.36e-15
SHC3	-1.10849	1.92e-16	1.81e-15
SNHG8	1.01204	1.29e-16	1.25e-15
CYSRT1	1.38806	2.08e-16	1.95e-15
FOXF1	-1.28619	1.44e-16	1.38e-15
AC005261.2	0.728812	1.5e-16	1.43e-15
CLIP2	-0.81877	1.45e-16	1.39e-15
DBF4	0.688542	1.94e-16	1.83e-15
CHMP4C	0.963695	1.61e-16	1.53e-15
ACY1	0.875817	2.07e-16	1.95e-15
AL121906.2	1.04826	2.38e-16	2.23e-15
SYTL4	-0.720294	1.6e-16	1.52e-15
QSER1	-0.970106	1.67e-16	1.59e-15
RRP9	0.648791	1.7e-16	1.62e-15
MAP3K10	0.605516	1.83e-16	1.73e-15
AC124248.1	-1.63225	2.49e-16	2.32e-15
HNRNPA1P33	1.9453	2.53e-16	2.36e-15
HMGB1P6	-0.573227	2.03e-16	1.92e-15
IL1RL2	-1.71862	2.44e-16	2.28e-15
ZNF415	-0.574874	1.91e-16	1.8e-15
MIR22HG	-1.02337	1.77e-16	1.68e-15
IRF7	1.05889	1.86e-16	1.76e-15
ASNS	0.714352	1.8e-16	1.71e-15
USP11	-0.504489	1.67e-16	1.59e-15
ATP1B1	-1.16476	1.71e-16	1.63e-15
METTL12	0.926388	2.38e-16	2.23e-15
AL109811.2	1.10945	2.75e-16	2.56e-15
LINC00882	-1.03259	2.76e-16	2.57e-15
CNN2	-1.00273	1.82e-16	1.73e-15
MOB1A	-0.46646	1.85e-16	1.75e-15
CDIP1	-0.864489	1.88e-16	1.78e-15
DIAPH3	1.5447	2.99e-16	2.76e-15
DLX1	5.9343	3.01e-16	2.78e-15
PLEKHG5	-0.777533	2.26e-16	2.12e-15
AC016582.3	-1.48398	2.94e-16	2.72e-15
FAM46A	-1.05569	1.98e-16	1.87e-15
CPXM1	-1.45503	2.33e-16	2.18e-15
FOXRED2	0.736317	1.99e-16	1.88e-15
E2F2	1.54719	3.15e-16	2.9e-15
MAPK8IP2	1.45181	2.56e-16	2.38e-15
PHLDA1	-1.1411	2.11e-16	1.99e-15
SMARCD3	-0.925284	2.15e-16	2.02e-15
PVT1	1.08597	2.84e-16	2.63e-15
TM7SF2	1.03804	2.09e-16	1.97e-15
APOC1	2.21657	3.01e-16	2.78e-15
F2RL2	2.22952	3.41e-16	3.12e-15
AC006504.8	0.975992	3.42e-16	3.12e-15
RAP1B	-0.481291	2.22e-16	2.09e-15
AP006748.1	3.7889	3.39e-16	3.1e-15
SERTAD4	-1.1421	2.76e-16	2.57e-15
OLFML1	-1.15693	2.72e-16	2.53e-15
DPF1	1.02683	3.63e-16	3.31e-15
SRL	-1.5803	3.28e-16	3.01e-15
ACTA2-AS1	-1.37338	3.18e-16	2.93e-15
RABGGTB	0.599912	2.41e-16	2.25e-15
TLE2	-0.827386	2.38e-16	2.23e-15
	1.77998	3.83e-16	3.48e-15
AL354718.1	-1.16072	3.81e-16	3.47e-15
DFNA5	-0.827346	3.06e-16	2.82e-15
SLC45A2	4.35463	3.79e-16	3.46e-15
ZC3H12B	-1.06582	3.54e-16	3.23e-15
QRICH2	0.963949	3.68e-16	3.35e-15
PRAC2	1.69753	3.59e-16	3.28e-15
NFIA	-0.536905	2.63e-16	2.45e-15
TWSG1	-0.706589	2.65e-16	2.46e-15
PCAT1	2.45112	4.24e-16	3.85e-15
FAM111B	1.73198	4.08e-16	3.7e-15
REXO2	1.00968	2.66e-16	2.47e-15
AC020978.5	1.29513	4.24e-16	3.85e-15
PAQR6	2.12692	4e-16	3.63e-15
DDB2	-0.668197	2.87e-16	2.66e-15
TMEM250	0.531927	2.81e-16	2.61e-15
AL357054.4	-1.1541	4.28e-16	3.88e-15
P2RX5	1.85232	4.53e-16	4.08e-15
KLHL21	-0.58007	2.81e-16	2.61e-15
AL390719.1	1.63336	4.47e-16	4.04e-15
ZFHX2-AS1	1.38841	4.55e-16	4.1e-15
H1F0	0.624492	3.07e-16	2.82e-15
NFKB2	0.731074	2.92e-16	2.7e-15
ANXA1	-1.28325	3.02e-16	2.78e-15
KCNK3	-1.76342	3.01e-16	2.78e-15
NEK5	1.6245	4.36e-16	3.94e-15
GPC2	1.5074	4.8e-16	4.31e-15
ABCA2	0.648198	3.09e-16	2.84e-15
ADH1B	-1.62414	4.34e-16	3.93e-15
CYSLTR2	-1.4044	4.86e-16	4.36e-15
SYDE1	-0.947886	3.57e-16	3.25e-15
OPN1SW	-0.80648	4.71e-16	4.23e-15
ATP1B2	-1.12345	4.34e-16	3.93e-15
ARFIP2	0.585102	3.23e-16	2.96e-15
SMCO4	0.751787	3.28e-16	3.01e-15
GALNT7	1.13059	3.28e-16	3.01e-15
PKN1	0.789748	3.34e-16	3.07e-15
RABGAP1	-0.431572	3.35e-16	3.07e-15
UBR5-AS1	0.713971	4.47e-16	4.04e-15
SNORA33	1.62621	5.44e-16	4.87e-15
AC019080.1	-1.01208	5.77e-16	5.16e-15
IL17RE	-1.29193	4.3e-16	3.89e-15
CDADC1	-0.475304	4.69e-16	4.21e-15
CIB2	-1.16345	4.49e-16	4.05e-15
AC020633.1	1.50676	6.08e-16	5.42e-15
ASPHD1	1.52365	5.74e-16	5.13e-15
TRGJP2	2.24833	6.28e-16	5.59e-15
FRRS1L	-1.49869	5.18e-16	4.64e-15
ODAM	-1.95152	6.44e-16	5.72e-15
BRF1	0.444053	4.29e-16	3.89e-15
NOTCH1	-0.889289	4.28e-16	3.88e-15
FAM53A	0.855838	6.74e-16	5.97e-15
ZFP62	0.423538	4.67e-16	4.21e-15
USP2	-1.21601	6.57e-16	5.83e-15
PHLDB3	0.760405	4.78e-16	4.3e-15
COL4A5	-0.733579	4.47e-16	4.04e-15
AC092171.4	1.89294	7.2e-16	6.36e-15
ENPP6	-1.66359	6.61e-16	5.87e-15
MTHFD2L	0.73235	5.21e-16	4.67e-15
FENDRR	-1.51491	5.33e-16	4.77e-15
AP000487.1	0.710538	7.87e-16	6.91e-15
AL355488.2	1.26108	7.72e-16	6.79e-15
AC132192.2	1.6561	8.25e-16	7.23e-15
S100A6	-1.43134	5.43e-16	4.86e-15
SPRED3	0.904275	8.22e-16	7.21e-15
TMEM238	1.56018	7.63e-16	6.72e-15
SIX4	0.816279	6.34e-16	5.64e-15
POMC	-1.44589	8.51e-16	7.44e-15
AC009133.1	0.706752	7.69e-16	6.77e-15
A1BG-AS1	-1.22629	8.65e-16	7.55e-15
CYB5R3	-0.553358	5.88e-16	5.25e-15
SCN4B	-0.982369	7.27e-16	6.41e-15
ZNF75A	0.415852	6.08e-16	5.42e-15
PRKCE	-0.544771	7.01e-16	6.2e-15
PTTG1	1.35855	8.88e-16	7.74e-15
2018-03-09	0.556648	6.66e-16	5.91e-15
SGO1	1.55599	9.71e-16	8.44e-15
FOXO4	-0.539926	6.06e-16	5.41e-15
LPCAT4	-0.716167	6.88e-16	6.09e-15
ZDHHC18	0.464876	6.3e-16	5.61e-15
HEBP2	0.72401	6.19e-16	5.51e-15
GRIK5	-0.963313	7.99e-16	7.01e-15
AC105285.1	0.882795	9.78e-16	8.49e-15
TMEM86A	0.798277	8.5e-16	7.43e-15
COL13A1	-1.1538	9.04e-16	7.88e-15
DLX3	-1.47838	1.08e-15	9.31e-15
ITPRIP	-0.829306	6.94e-16	6.14e-15
ATOH8	-1.23255	7.29e-16	6.43e-15
SDS	1.74691	1.08e-15	9.38e-15
SLC14A1	-2.24445	7.03e-16	6.22e-15
LRRC45	0.858755	7.77e-16	6.83e-15
FAM69B	0.929263	8.89e-16	7.75e-15
ELF1	-0.845219	7.23e-16	6.38e-15
AURKA	1.03377	1.1e-15	9.53e-15
SFXN4	0.732664	7.74e-16	6.81e-15
GATA5	-1.90125	1.07e-15	9.24e-15
HCAR2	-1.45769	1.1e-15	9.5e-15
KMT5C	0.783224	1e-15	8.69e-15
NELFCD	0.410731	7.57e-16	6.68e-15
SPDYA	1.19241	1.27e-15	1.09e-14
FBXO27	-1.21445	9.92e-16	8.61e-15
NTN4	-1.33192	7.95e-16	6.98e-15
POC1A	0.938796	1.19e-15	1.02e-14
CCDC3	-1.18442	8.37e-16	7.33e-15
AP000842.3	2.80567	1.26e-15	1.09e-14
ACSL6	-1.385	1.2e-15	1.04e-14
PJA2	-0.764804	8.39e-16	7.34e-15
CBR3-AS1	0.863212	9.58e-16	8.33e-15
AC008764.6	0.97227	1.37e-15	1.17e-14
RIMKLA	0.995587	1.17e-15	1.01e-14
FEZ2	-0.431207	8.76e-16	7.64e-15
ARSK	-0.61089	1.06e-15	9.15e-15
TRIM11	0.571978	9.58e-16	8.33e-15
GADD45A	-0.910723	9.67e-16	8.4e-15
C17orf62	0.590374	9.08e-16	7.91e-15
DISP3	1.49622	1.46e-15	1.24e-14
KRT4	-2.62566	1.34e-15	1.15e-14
RGS11	1.71012	1.33e-15	1.14e-14
KCNH2	-1.08712	1.05e-15	9.12e-15
BICD2	-0.519553	1e-15	8.69e-15
AC025183.1	2.0348	1.65e-15	1.39e-14
RPP40	0.711362	1.47e-15	1.25e-14
SLC8A2	-1.51717	1.55e-15	1.31e-14
MFSD3	1.04986	1.08e-15	9.31e-15
KLHL29	-0.830851	1.15e-15	9.88e-15
ZBTB45	0.45064	1.16e-15	9.97e-15
PCAT6	1.00241	1.51e-15	1.28e-14
KLK15	2.40991	1.67e-15	1.41e-14
ZNF692	1.05863	1.15e-15	9.89e-15
EXO1	1.52279	1.74e-15	1.47e-14
PNMA8B	-1.11148	1.61e-15	1.36e-14
NTF4	-1.99324	1.59e-15	1.35e-14
VSIR	-0.967525	1.11e-15	9.59e-15
RHPN1-AS1	0.940321	1.82e-15	1.53e-14
TEF	-0.764121	1.14e-15	9.83e-15
FBXL2	-1.03328	1.52e-15	1.3e-14
SLC1A3	-1.04259	1.41e-15	1.2e-14
MSH5	1.24269	1.81e-15	1.52e-14
	-1.62922	1.77e-15	1.49e-14
AL662907.1	0.72806	1.9e-15	1.6e-14
YAF2	-0.355263	1.34e-15	1.15e-14
AC008870.2	1.30947	1.95e-15	1.64e-14
AC019069.1	1.30897	1.97e-15	1.66e-14
TANGO6	-0.494821	1.41e-15	1.21e-14
PER2	-0.827616	1.26e-15	1.09e-14
ANKRD40	-0.421352	1.26e-15	1.08e-14
LUC7L2	0.400759	1.28e-15	1.1e-14
ISYNA1	-1.01596	1.28e-15	1.1e-14
SLC25A17	0.601374	1.34e-15	1.15e-14
FGFR1	-0.900425	1.33e-15	1.14e-14
TAX1BP3	-0.66494	1.42e-15	1.21e-14
PLEKHA8P1	-0.966931	2.05e-15	1.72e-14
AC084018.1	1.61885	2.18e-15	1.82e-14
AC004982.1	1.68554	2.18e-15	1.82e-14
PMP22	-1.04215	1.38e-15	1.18e-14
ZNF587B	0.592853	1.69e-15	1.43e-14
	2.0719	2.24e-15	1.87e-14
PAGE4	-1.89441	1.68e-15	1.42e-14
SUCLA2	-0.57017	1.44e-15	1.23e-14
ZNF486	-1.14019	1.95e-15	1.64e-14
AC010504.1	0.70851	2.36e-15	1.96e-14
TAGLN	-1.61725	1.74e-15	1.47e-14
RBM43	-0.652762	1.66e-15	1.4e-14
SCAPER	-0.523896	1.64e-15	1.39e-14
ATG9B	1.3989	2.41e-15	2e-14
ARID3A	0.752773	2.12e-15	1.77e-14
AL049838.1	-1.15122	2.48e-15	2.06e-14
PLPP3	-1.0509	1.61e-15	1.36e-14
SORT1	-0.649556	1.6e-15	1.36e-14
EME2	1.38867	2.1e-15	1.76e-14
RABEP2	0.914109	1.67e-15	1.41e-14
FHL2	-1.21034	1.68e-15	1.42e-14
P3H3	-1.12475	1.72e-15	1.45e-14
AC010226.1	-0.776172	2.74e-15	2.27e-14
NTRK2	-1.26169	2.11e-15	1.77e-14
REEP2	-1.08378	2.32e-15	1.93e-14
FBXL6	0.884852	2.23e-15	1.86e-14
CSTA	-1.4413	2.38e-15	1.98e-14
REV3L	-0.842039	1.99e-15	1.67e-14
GID8	0.341626	1.94e-15	1.63e-14
MAP1LC3B2	-0.580161	3.19e-15	2.62e-14
PDE5A	-1.44558	2.03e-15	1.71e-14
AC010761.1	1.09628	3.3e-15	2.71e-14
ID1	-1.6847	2.04e-15	1.71e-14
LIME1	1.36666	3.26e-15	2.68e-14
OXER1	-1.31894	3.07e-15	2.53e-14
ZNF598	0.510727	2.13e-15	1.78e-14
KIF9-AS1	0.647831	3.21e-15	2.64e-14
NMRAL1	0.743096	2.09e-15	1.75e-14
GALNT5	-1.59306	3.06e-15	2.52e-14
LEPR	-1.06329	2.31e-15	1.93e-14
SIGLEC15	-1.26201	3.5e-15	2.86e-14
ASB3	-0.611195	3.12e-15	2.57e-14
HCN2	1.45449	3.6e-15	2.94e-14
NECAB3	0.744815	2.2e-15	1.84e-14
TCF3	0.467418	2.22e-15	1.85e-14
TDRKH-AS1	0.856856	3.82e-15	3.1e-14
CCDC68	-1.18402	3.22e-15	2.65e-14
C9orf24	-1.48258	3.79e-15	3.08e-14
PPIAP22	0.569458	2.75e-15	2.28e-14
AC021016.2	-0.648225	3.55e-15	2.9e-14
ZNF826P	-1.42562	3.6e-15	2.94e-14
AC010186.2	-0.682976	3.44e-15	2.81e-14
ADM2	1.26456	2.79e-15	2.31e-14
TRIP10	-0.698287	2.43e-15	2.02e-14
MANEAL	1.00643	3e-15	2.48e-14
ASCL2	-1.78539	3.72e-15	3.03e-14
AC012467.1	1.6793	4.03e-15	3.27e-14
BHLHB9	-0.509379	3.03e-15	2.51e-14
KCNQ4	-0.927009	3.55e-15	2.9e-14
FXYD1	-1.40034	3.97e-15	3.22e-14
LPAL2	-1.46531	3.88e-15	3.15e-14
SLC7A11	1.64533	3.89e-15	3.16e-14
CPT1B	1.45163	4.41e-15	3.56e-14
PPIC	-0.860285	2.87e-15	2.38e-14
COA4	0.519633	2.8e-15	2.32e-14
MRAS	-0.765137	3.01e-15	2.49e-14
AP002360.4	1.4691	4.63e-15	3.74e-14
MAL2	0.786547	2.79e-15	2.31e-14
DDX39A	0.670637	2.94e-15	2.43e-14
BMP5	-3.40918	4.33e-15	3.5e-14
RPS6KA4	0.660832	2.96e-15	2.45e-14
SAAL1	0.621785	3.69e-15	3.01e-14
DLG4	-0.806501	3.35e-15	2.75e-14
CTD-2201I18.1	1.34783	4.9e-15	3.94e-14
HES4	1.66059	4.18e-15	3.38e-14
B3GNTL1	0.690247	4.31e-15	3.48e-14
MRGPRF	-1.28903	3.15e-15	2.6e-14
TMEM262	0.857136	5.06e-15	4.06e-14
PGAM1	-0.491579	3.23e-15	2.66e-14
SLC43A1	1.39228	3.33e-15	2.73e-14
AC005336.2	-2.74771	4.91e-15	3.95e-14
ELL3	1.21731	5.35e-15	4.28e-14
TMEM221	-1.03408	5.3e-15	4.25e-14
KPNA2	0.78498	3.79e-15	3.08e-14
AC009549.1	-1.15975	5.32e-15	4.26e-14
PHACTR2	-0.787716	3.37e-15	2.76e-14
NAB1	-0.595691	3.44e-15	2.82e-14
PAFAH1B1	-0.400094	3.39e-15	2.78e-14
AC004918.3	0.707844	5.59e-15	4.47e-14
SLC25A39	0.729154	3.52e-15	2.88e-14
MTG1	0.936127	4.97e-15	3.99e-14
AC087741.1	1.6615	4.87e-15	3.91e-14
NCKAP5L	-0.801477	3.85e-15	3.13e-14
TMCC1-AS1	0.878972	5.34e-15	4.27e-14
AC060766.7	-1.12414	5.81e-15	4.62e-14
ORAOV1	0.489613	4.21e-15	3.4e-14
CLEC3B	-1.21482	4.65e-15	3.74e-14
MRPL41	1.09347	3.65e-15	2.98e-14
GPSM1	0.766923	4.06e-15	3.29e-14
CCNB1	0.952714	5.03e-15	4.03e-14
MAPKBP1	-0.493121	4.02e-15	3.26e-14
NFATC4	-0.913519	4.02e-15	3.26e-14
PTGDS	-1.94603	3.97e-15	3.22e-14
RAB6C	1.1406	5.95e-15	4.73e-14
AL163636.2	-1.35198	6.28e-15	4.98e-14
ID2	-1.06419	3.85e-15	3.13e-14
GFRA2	-1.24296	6.14e-15	4.88e-14
RASL11B	-1.21757	5.58e-15	4.46e-14
ZNF814	0.690387	4.7e-15	3.78e-14
CHRNB1	-0.690684	5.66e-15	4.51e-14
FADS1	-1.11893	4.21e-15	3.41e-14
LINC00623	1.05054	6.16e-15	4.9e-14
RHCG	-2.56903	6.93e-15	5.48e-14
LCLAT1	0.673102	4.63e-15	3.74e-14
HBB	-1.49594	5.7e-15	4.54e-14
FAM201A	1.04728	6.72e-15	5.33e-14
LYNX1	-0.881234	4.82e-15	3.88e-14
AQP9	-1.55894	7.55e-15	5.96e-14
RANGAP1	0.609352	4.68e-15	3.77e-14
EDRF1	0.789127	5.36e-15	4.29e-14
MSMO1	-0.839668	5.29e-15	4.24e-14
CANT1	0.66511	5.57e-15	4.45e-14
AC006504.1	1.60736	8.85e-15	6.95e-14
ZNF528-AS1	0.726614	6.93e-15	5.49e-14
TCEAL5	-1.36522	8.9e-15	6.98e-14
LRRC2	-1.57871	8.64e-15	6.78e-14
AC145285.7	1.17351	9.36e-15	7.31e-14
SLC20A2	-0.602992	5.61e-15	4.48e-14
AL022068.1	-1.65721	9.05e-15	7.08e-14
RPL22L1	1.17946	6.4e-15	5.07e-14
HASPIN	1.38641	9.99e-15	7.76e-14
TTK	1.40759	9.56e-15	7.45e-14
PSMG4	0.632976	7.29e-15	5.76e-14
AC011239.2	-1.41273	1.03e-14	7.96e-14
CXCL6	-1.68983	9.23e-15	7.2e-14
SORBS2	-0.721224	6.37e-15	5.06e-14
FBRSL1	0.50051	6.36e-15	5.05e-14
RITA1	0.501148	6.91e-15	5.48e-14
CD248	-1.0072	7.13e-15	5.64e-14
PITPNM2	-0.688252	7.93e-15	6.24e-14
TMEM57	0.480868	6.71e-15	5.32e-14
LRRC4	-1.26736	1.07e-14	8.26e-14
NAP1L5	-0.842358	8.34e-15	6.56e-14
TMEM35B	-0.548324	9.25e-15	7.22e-14
NPM1	0.521432	7.47e-15	5.9e-14
SCD5	-0.956804	7.33e-15	5.79e-14
OSR2	-0.823467	7.41e-15	5.85e-14
LGALS8-AS1	1.51797	1.21e-14	9.33e-14
NEFL	-2.55962	1.11e-14	8.59e-14
DES	-2.05466	9.11e-15	7.13e-14
AC123912.4	-1.49167	1.23e-14	9.44e-14
MAP1B	-1.35805	7.66e-15	6.04e-14
NAT9	0.600529	7.97e-15	6.28e-14
AC008438.1	0.732516	1.29e-14	9.89e-14
AC048341.3	1.64519	1.31e-14	1e-13
AC004066.2	1.6992	1.32e-14	1.01e-13
NCLN	0.614896	7.83e-15	6.17e-14
GPR89B	0.659057	1.23e-14	9.44e-14
PTRH2	0.666201	9.01e-15	7.06e-14
AKAP11	-0.74467	8.11e-15	6.38e-14
AC004803.1	-0.447032	1.17e-14	9e-14
PPIA	0.549852	8.58e-15	6.74e-14
NCL	0.357384	9.21e-15	7.19e-14
ACO1	-0.544636	8.42e-15	6.61e-14
SYTL3	-0.642407	1.03e-14	7.98e-14
AC008555.8	0.84545	1.33e-14	1.02e-13
ST14	0.661751	8.86e-15	6.95e-14
C15orf61	0.666046	1.14e-14	8.8e-14
PALM3	-1.56201	1.3e-14	9.98e-14
EIF4BP3	0.975179	1.46e-14	1.11e-13
DIP2C	-0.515627	9.01e-15	7.06e-14
RAI2	-0.794346	9.13e-15	7.14e-14
UTP6	0.319028	9.14e-15	7.15e-14
FRMPD3	1.62402	1.38e-14	1.05e-13
NRDC	0.36678	9.2e-15	7.19e-14
GNB2	0.666826	9.7e-15	7.55e-14
GABRD	1.83748	1.57e-14	1.19e-13
PLEKHH2	-1.08541	1.27e-14	9.78e-14
AC015689.1	1.27938	1.58e-14	1.2e-13
IP6K2	0.405012	9.41e-15	7.34e-14
DNM1P35	-1.03279	1.6e-14	1.21e-13
JAM3	-1.09987	9.68e-15	7.54e-14
QTRT1	0.822048	1e-14	7.8e-14
MRPL37	0.503016	9.83e-15	7.65e-14
DUSP2	-1.41597	1.1e-14	8.55e-14
CHURC1	-0.517843	9.95e-15	7.73e-14
BEND6	-0.923212	1.52e-14	1.16e-13
CYP27C1	-1.41953	1.7e-14	1.29e-13
CYTH3	0.86844	1.07e-14	8.33e-14
FBXO2	-1.12577	1.22e-14	9.41e-14
CSPG5	1.25308	1.65e-14	1.25e-13
ARMC6	0.549349	1.08e-14	8.34e-14
SNORD104	2.16887	1.79e-14	1.35e-13
FUS	0.456993	1.12e-14	8.64e-14
LHX6	0.985614	1.69e-14	1.28e-13
LINC00869	0.82148	1.55e-14	1.18e-13
AL139246.5	1.7103	1.76e-14	1.33e-13
RGMA	-0.973984	1.34e-14	1.02e-13
FOXN3	-0.677572	1.12e-14	8.67e-14
SNORA73B	1.87202	1.94e-14	1.46e-13
IFI27L2	-1.06216	1.49e-14	1.13e-13
FAM221A	1.12961	1.61e-14	1.22e-13
CAP1	-0.33217	1.23e-14	9.44e-14
VGLL1	-1.96272	1.88e-14	1.42e-13
GRIP1	-0.769616	1.56e-14	1.18e-13
AC117498.2	1.41329	2.06e-14	1.55e-13
AHR	-1.04688	1.22e-14	9.41e-14
BBS2	-0.450343	1.23e-14	9.48e-14
GMEB2	0.379918	1.31e-14	1.01e-13
TVP23A	-0.842674	1.89e-14	1.42e-13
FAM222A	1.58661	1.84e-14	1.38e-13
AC010260.1	1.23843	2.16e-14	1.62e-13
SYCE2	0.770937	2.16e-14	1.61e-13
AL022322.1	1.60925	2.11e-14	1.58e-13
NFYB	-0.466333	1.29e-14	9.9e-14
PCM1	-0.539984	1.31e-14	1e-13
IDS	-0.542744	1.3e-14	9.97e-14
CLCN2	0.59809	1.77e-14	1.34e-13
LAMTOR5-AS1	0.6141	2.15e-14	1.61e-13
PTPN21	-0.611923	1.36e-14	1.04e-13
CYLD	-0.504369	1.34e-14	1.03e-13
ISL1	-1.13541	1.78e-14	1.35e-13
EPOP	1.07351	2.03e-14	1.53e-13
CEL	-1.47816	2.19e-14	1.64e-13
UBE2O	0.348581	1.42e-14	1.09e-13
AATBC	-1.48744	2.21e-14	1.65e-13
THRA	-0.499861	1.41e-14	1.08e-13
CENPX	0.905199	1.43e-14	1.09e-13
ESPNL	-1.62521	2.33e-14	1.73e-13
RABIF	0.430225	1.74e-14	1.31e-13
RAB3IP	0.583016	1.5e-14	1.14e-13
EIF2B4	0.488462	1.51e-14	1.15e-13
ZNF667	0.619037	1.95e-14	1.47e-13
LANCL3	-1.43074	2.51e-14	1.86e-13
FAM19A2	-0.98882	2.31e-14	1.72e-13
RELL2	0.974706	2.53e-14	1.87e-13
TFAP4	0.675378	1.99e-14	1.49e-13
RBM39	0.373379	1.68e-14	1.28e-13
GPR39	-1.58183	2.68e-14	1.98e-13
AC005839.1	0.677055	2.74e-14	2.02e-13
LMNB1	1.06939	2.25e-14	1.67e-13
WNT2B	-1.07415	2.03e-14	1.52e-13
EPHA5	-2.00984	2.41e-14	1.78e-13
AARSD1	0.599033	2.57e-14	1.9e-13
C20orf144	1.09348	3.06e-14	2.24e-13
AP001453.2	1.29686	3.06e-14	2.24e-13
DYM	-0.400685	1.79e-14	1.35e-13
PFKFB3	-0.907061	1.87e-14	1.41e-13
AC012360.3	0.825176	3.03e-14	2.22e-13
CRACR2B	1.28606	1.97e-14	1.48e-13
FAAH	0.914981	1.92e-14	1.45e-13
HIST1H4I	1.04625	2.4e-14	1.78e-13
OR51A9P	2.28697	3.3e-14	2.41e-13
LIPG	-1.41805	2.76e-14	2.03e-13
THUMPD3-AS1	0.748031	2.46e-14	1.82e-13
FAM20B	-0.371592	1.97e-14	1.48e-13
FAM161B	-0.468869	2.4e-14	1.78e-13
MPPE1	-0.452329	2.37e-14	1.76e-13
DIRAS3	-1.06478	3.13e-14	2.28e-13
CXCL13	-2.37714	3.11e-14	2.27e-13
SPON2	2.23118	2.2e-14	1.64e-13
AC027031.2	-1.19412	3.51e-14	2.54e-13
HMG20B	0.804043	2.17e-14	1.62e-13
JCAD	-1.00994	2.17e-14	1.62e-13
YBX2	-1.37455	3.51e-14	2.55e-13
GAS5	0.919915	2.2e-14	1.64e-13
AP001453.3	0.822132	3.62e-14	2.62e-13
RIMS4	-1.52816	3.33e-14	2.42e-13
AL139011.1	0.717923	3.81e-14	2.75e-13
ZNF208	-1.35451	3.8e-14	2.74e-13
ORC6	1.0231	3.76e-14	2.72e-13
CORO1B	0.701626	2.44e-14	1.81e-13
TP53I11	0.692989	2.37e-14	1.76e-13
B4GALT5	-0.542552	2.38e-14	1.77e-13
CD99L2	-0.527945	2.39e-14	1.78e-13
BAIAP3	0.992959	2.68e-14	1.98e-13
SUPT3H	-0.680222	2.99e-14	2.19e-13
SNORA42	1.41063	4.29e-14	3.08e-13
CDKAL1	-0.29373	2.89e-14	2.12e-13
POLH	-0.560386	3.04e-14	2.23e-13
CLUAP1	-0.361533	2.74e-14	2.02e-13
ANKS1A	-0.455799	2.64e-14	1.95e-13
AC083923.2	0.906873	4.55e-14	3.26e-13
SOS2	-0.451677	2.67e-14	1.97e-13
WDR62	1.1534	4.33e-14	3.11e-13
RRP1	0.686129	2.94e-14	2.16e-13
TMEM127	-0.336218	2.85e-14	2.09e-13
GATD1	0.485717	2.82e-14	2.08e-13
SFRP5	-2.30985	4.76e-14	3.4e-13
DCAF6	0.458966	2.87e-14	2.11e-13
NARF	0.583448	2.97e-14	2.18e-13
ZBTB7B	0.601829	2.95e-14	2.16e-13
RPL36	0.899317	3.22e-14	2.35e-13
PPP4R1L	-0.805227	4.39e-14	3.15e-13
PPP1R9A	0.757705	3.39e-14	2.46e-13
[truncated: 8,249 more rows]
